# Supplementary material for: Diagenesis is key to unlocking outcrop fracture data suitable for quantitative extrapolation to geothermal targets
Source: Frontiers journal article supplement (doi:10.3389/feart.2025.1545052), 2025-04-02
Supplement: Table_2.xlsx [file Table_2.xlsx]

## Sheet: Potsdam HR results
Category	Brunell Rd	Route 16	Potsdam HR average	Assumed initial porosity (Pi) %
Detrital Quartz	64.3087	65.7491	65.0289	40
Detrital K-Feldspar	10.075	8.31128	9.19315
Albitized Feldspar	0	0	0
Calcite	0	0	0
Mica	0	0	0
Zircon	0.107181	0	0.0535906
Rutile	0.321543	0.211752	0.266648
Other Accessories	0	0.052938	0.026469
Fe-Oxide	0	0.158814	0.0794071
Quartz Cement	11.4684	13.711	12.5897
Illite Clays	2.89389	1.58814	2.24102
Kaolinite	2.03644	1.1117	1.57407
Chlorite	0	0	0
Feldspar Cement	3.9657	5.61143	4.78857
Primary Porosity	0.428725	1.21758	0.82315
Secondary Porosity	4.39443	2.27634	3.33538
Calculated IGV	20.7931	23.3986	22.0959
COPL	24.249	21.6724	22.9822
CEPL	15.4263	17.3739	16.3838
Icomp	0.611187	0.555044	0.583809

## Sheet: Condensed table
Category	Brunell Rd	Route 16	Potsdam HR average				Category	Brunell Rd	Route 16	Potsdam HR average
Detrital Quartz	64.3087	65.7491	65.0289				Detrital Quartz	64.3087	65.7491	65.0289
Detrital K-Feldspar	10.075	8.31128	9.19315				Detrital K-Feldspar	10.075	8.31128	9.19315
Albitized Feldspar	0	0	0				Calcite	0	0	0
Calcite	0	0	0				Accessories	0.428725	0.26469	0.346707
Mica	0	0	0				Fe-Oxide	0	0.158814	0.0794071
Zircon	0.107181	0	0.0535906				Quartz Cement	11.4684	13.711	12.5897
Rutile	0.321543	0.211752	0.266648				Feldspar Cement	3.9657	5.61143	4.78857
Other Accessories	0	0.052938	0.026469				Illite Clays	2.89389	1.58814	2.24102
Fe-Oxide	0	0.158814	0.0794071				Kaolinite	2.03644	1.1117	1.57407
Quartz Cement	11.4684	13.711	12.5897				Primary Porosity	0.428725	1.21758	0.82315
Illite Clays	2.89389	1.58814	2.24102				Secondary Porosity	4.39443	2.27634	3.33538
Kaolinite	2.03644	1.1117	1.57407				Assumed initial porosity (Pi) 40%
Chlorite	0	0	0				Calculated IGV	20.7931	23.3986	22.0959
Feldspar Cement	3.9657	5.61143	4.78857				COPL	24.249	21.6724	22.9822
Primary Porosity	0.428725	1.21758	0.82315				CEPL	15.4263	17.3739	16.3838
Secondary Porosity	4.39443	2.27634	3.33538				Icomp	0.611187	0.555044	0.583809

## Sheet: QFL
Counts
Category	Brunell Rd	Route 16				Q	F	L
Q	600	1242			Brunell Rd	0.864553	0.135447	0
F	94	157			Route 16	0.887777	0.112223	0
L	0	0
Total counts	694	1399				86.4553	13.5447	0
						88.7777	11.2223	0

## Sheet: Deformation Bands
	Cataclastic Zone	Damage zone				Cataclastic Zone	Damage zone
	(%)	(%)				(%)	(%)			Category	Cataclastic Zone	Damage zone		Avg
Detrital Quartz	0.491998	0.562576			Detrital Quartz	49.1998	56.2576			Detrital Quartz	49.1998	56.2576		52.7287
Detrital K-Feldspar	0.0243035	0.108141			Detrital K-Feldspar	2.43035	10.8141			Detrital K-Feldspar	2.43035	10.8141		6.62222
Albitized Feldspar	0	0			Albitized Feldspar	0	0			Calcite	0	0		0
Calcite	0	0			Calcite	0	0			Accessories	0.652045	0.72904		0.690543
Mica	0	0			Mica	0	0			Fe-Oxide	7.76526	5.4678		6.61653
Zircon	0.000592768	0.00121507			Zircon	0.0592768	0.121507			Quartz Cement	35.6846	11.9077		23.7962
Rutile	0.00592768	0.00607533			Rutile	0.592768	0.607533			Feldspar Cement	0.414938	1.94411		1.17952
Fe-Oxide	0.0776526	0.054678			Fe-Oxide	7.76526	5.4678			Illite Clays	1.36337	5.22479		3.29408
Other Accessories	0	0			Other Accessories	0	0			Kaolinite	0	0.36452		0.18226
Quartz Cement	0.356846	0.119077			Quartz Cement	35.6846	11.9077			Primary Porosity	2.01541	3.76671		2.89106
Illite Clays	0.0136337	0.0522479			Illite Clays	1.36337	5.22479			Secondary Porosity	0.474215	3.52369		1.99895
Kaolinite	0	0.0036452			Kaolinite	0	0.36452			Total Porosity	2.48963	7.2904		4.89001
Chlorite	0	0			Chlorite	0	0
Feldspar Cement	0.00414938	0.0194411			Feldspar Cement	0.414938	1.94411
Primary Porosity	0.0201541	0.0376671			Primary Porosity	2.01541	3.76671
Secondary Porosity	0.00474215	0.0352369			Secondary Porosity	0.474215	3.52369
