# Supplementary material for: Diagenesis is key to unlocking outcrop fracture data suitable for quantitative extrapolation to geothermal targets
Source: Frontiers journal article supplement (doi:10.3389/feart.2025.1545052), 2025-04-02
Supplement: Table_3.xlsx [file Table_3.xlsx]

## Sheet: Sheet1
Fig. 5 Legend	Location Number	ID	Compressive Strength (N/mm2)	Notes												1 N/mm2 = 1 MPa
	1A	1	68	Location 1 - rock with regularly spaced chess board pattern fractures
	1A	2	72
	1A	3	60											Summary				Avg Mpa	# tests
L2	1A	4	76	Avg 1A										reg spaced chessboard				72.25	20
	1A	5	77	69.75
	1A	6	75.5											fracture cluster				56.5	13
	1A	7	65
	1A	8	71.5		Avg Location 1									stained fracture cluster				65.3	12
	1A	9	55.5		72.25
	1A	10	77											sparse fractures				65	36
	1B	1	73.5
	1B	2	79											DBs				76.5	10
	1B	3	80.5	Avg 1B
	1B	4	67.5	74.75										HR S			47.75		10
L3	1B	5	69.5												DB-HR			49.5
	1B	6	72.5											HR N			51.25		12
	1B	7	74.5
	1B	8	74															113 total tests
	1B	9	77
	1B	10	79.5
	2A	1	45	Location 2A - rock with fracture cluster
	2A	2	57
	2A	3	62										Avg - All measurements			63.3938	n=113
	2A	4	76										Avg - All except DefBand			62.116	n=103
	2A	5	55										Avg - All away from DB/N-S HR			65.5	n=81	L1 on Fig. 5
L4, L5	2A	6	62	Avg 2A
	2A	7	61	56.46
	2A	8	47
	2A	9	55
	2A	10	61
	2A	11	44
	2A	12	57
	2A	13	52
	2B	1	62.5	Location 2B - rock with stained fracture cluster
	2B	2	59
	2B	3	63
	2B	4	67.5
L8	2B	5	74	Avg 2B
	2B	6	67	65.333
	2B	7	77
	2B	8	65
	2B	9	61
	2B	10	60
	2B	11	58
	2B	12	70
	3A	1	70	Location 3 - rock with sparse fractures
	3A	2	62
	3A	3	53
	3A	4	74
	3A	5	66	Avg 3A
	3A	6	55	61.7
	3A	7	58
	3A	8	62
	3A	9	66		Avg Location 3
L6	3A	10	51		65.65
	3B	1	66
	3B	2	66
	3B	3	79	Avg 3B
	3B	4	77	69.6
	3B	5	77.5
	3B	6	66
	3B	7	52
	3B	8	74
	3B	9	69
	3B	10	69.5
	4A	1	72.5	Location 4A - Deformation Band
	4A	2	73
	4A	3	77
L11	4A	4	72.5	Avg 4A
	4A	5	79.5	76.55
	4A	6	82
	4A	7	81
	4A	8	78.5
	4A	9	74.5
	4A	10	75
	4B	1	57	Location 4B - Rock South of Deformation Band
	4B	2	39
	4B	3	47
L9	4B	4	56	Avg 4B
	4B	5	42	47.75
	4B	6	49
	4B	7	53
	4B	8	46
	4B	9	45
	4B	10	43.5
	4C	1	58	Location 4C - Rock North of Deformation Band
	4C	2	55.5
	4C	3	49.5
	4C	4	55
L10	4C	5	56	Avg 4C
	4C	6	39	51.25
	4C	7	53
	4C	8	42.5
	4C	9	43.5
	4C	10	61.5
	4C	11	51
	4C	12	50.5
	5	1	54.5	Location 5 - Rock with sparse fractures
	5	2	66
	5	3	75
	5	4	72
	5	5	72.5
	5	6	67		Avg Location 5				Avg of Locations 3 & 5
L7	5	7	61.5		64.3438				64.9969
	5	8	65
	5	9	65
	5	10	50.5
	5	11	64.5
	5	12	65
	5	13	59
	5	14	55.5
	5	15	74
	5	16	62.5
			1A	1	68
			1A	2	72
			1A	3	60
			1A	4	76
			1A	5	77
			1A	6	75.5
			1A	7	65
			1A	8	71.5
			1A	9	55.5
			1A	10	77
			1B	1	73.5
			1B	2	79
			1B	3	80.5
			1B	4	67.5
			1B	5	69.5
			1B	6	72.5
			1B	7	74.5
			1B	8	74
			1B	9	77
			1B	10	79.5
			2A	1	45
			2A	2	57
			2A	3	62
			2A	4	76
			2A	5	55
			2A	6	62
			2A	7	61
			2A	8	47
			2A	9	55
			2A	10	61
			2A	11	44
			2A	12	57
			2A	13	52
			2B	1	62.5
			2B	2	59
			2B	3	63
			2B	4	67.5
			2B	5	74
			2B	6	67
			2B	7	77
			2B	8	65
			2B	9	61
			2B	10	60
			2B	11	58
			2B	12	70
			3A	1	70
			3A	2	62
			3A	3	53
			3A	4	74
			3A	5	66
			3A	6	55
			3A	7	58
			3A	8	62
			3A	9	66
			3A	10	51
			3B	1	66
			3B	2	66
			3B	3	79
			3B	4	77
			3B	5	77.5
			3B	6	66
			3B	7	52
			3B	8	74
			3B	9	69							4A	1	72.5
			3B	10	69.5							4A	2	73
			5	1	54.5							4A	3	77
			5	2	66							4A	4	72.5
			5	3	75							4A	5	79.5
			5	4	72							4A	6	82
			5	5	72.5							4A	7	81
			5	6	67							4A	8	78.5
			5	7	61.5							4A	9	74.5
			5	8	65							4A	10	75
			5	9	65							4B	1	57
			5	10	50.5							4B	2	39
			5	11	64.5							4B	3	47
			5	12	65							4B	4	56
			5	13	59							4B	5	42
			5	14	55.5							4B	6	49
			5	15	74							4B	7	53
			5	16	62.5							4B	8	46
												4B	9	45
												4B	10	43.5
												4C	1	58
												4C	2	55.5
												4C	3	49.5
												4C	4	55
												4C	5	56
												4C	6	39
												4C	7	53
												4C	8	42.5
												4C	9	43.5
												4C	10	61.5
												4C	11	51
												4C	12	50.5
