# Supplementary material for: Diagenesis is key to unlocking outcrop fracture data suitable for quantitative extrapolation to geothermal targets
Source: Frontiers journal article supplement (doi:10.3389/feart.2025.1545052), 2025-04-02
Supplement: Table_4.xlsx [file Table_4.xlsx]

## Sheet: Set A Spacings
	Set A Macrofractures_Scanline Rt16-1a				Set A Macrofractures_Scanline Rt16-1b				Set A Macrofractures_Scanline CBL-1 (3 smaller offset lines)				Set A Microfractures_Scanline R16-3-2C-1
	Fracture	Position (m)	Spacing (m)		Fracture	Position (m)	Spacing (m)		Fracture	Position (m)	Spacing (m)		Fracture	Position (mm)	Spacing (mm)
	1	0.16	0.27		1	0.025	0.005		1	0.176	0.16		1		0.068705
	2	0.43	0.36		2	0.03	0.014		2	0.336	0.132		2		0.095094
	3	0.79	0.25		3	0.044	0.326		3	0.468	0.084		3		0.793402
	4	1.04	0.13		4	0.37	0.126		4	0.552	0.044		4		0.138758
	5	1.17	0.05		5	0.496	0.308		5	0.596	0.076		5		0.136041
	6	1.22	0.27		6	0.804	0.026		6	0.672	0.006		6		0.471235
	7	1.49	0.07		7	0.83	0.134		7	0.678	0.014		7		0.517428
	8	1.56	0.09		8	0.964	0.176		8	0.692	0.578		8		1.17242
	9	1.65	0.04		9	1.14	0.014		9	1.27	0.04		9		0.046705
	10	1.69	0.21		10	1.154	0.556		10	1.31	0.098		10		0.133673
	11	1.9	0.06		11	1.71	0.1		11	1.408	0.066		11		0.020992
	12	1.96	0.22		12	1.81	0.304		12	1.474	0.002		12		0.452794
	13	2.18	0.24		13	2.114	0.076		13	1.476	0.006		13		0.163791
	14	2.42	0.25		14	2.19	0.206		14	1.482	0.024		14		0.558037
	15	2.67	0.07		15	2.396	0.478		15	1.506	0.074		15		0.032503
	16	2.74	0.24		16	2.874	0.256		16	1.58	0.096		16		0.277497
	17	2.98	0.15		17	3.13	0.01		17	1.676	0.056		17		0.040948
	18	3.13	0.14		18	3.14	0.312		18	1.732	0.034		18		0.035535
	19	3.27	0.06		19	3.452	0.116		19	1.766	0.178		19		0.037227
	20	3.33	0.07		20	3.568	0.248		20	1.944	0.116		20		0.096447
	21	3.4	0.03		21	3.816	0.044		21	2.06	0.122		21		0.098139
	22	3.43	0.14		22	3.86	0.376		22	2.182	0.118		22		0.205419
	23	3.57	0.03		23	4.236	0.17		23	2.3	0.132		23		0.018616
	24	3.6	0.26		24	4.406	0.18		24	2.432	0.034		24		0.079191
	25	3.86	0.06		25	4.586	0.004		25	2.466	0.04		25		0.023022
	26	3.92	0.13		26	4.59	0.378		26	2.506	1.948		26		0.397631
	27	4.05	0.04		27	4.968	0.392		27	0.558	2.018		27		0.280213
	28	4.09	0.2		28	5.36	0.062		28	2.576	0.042		28		0.116079
	29	4.29	0.02		29	5.422	0.076		29	2.618	0.184		29		0.019639
	30	4.31	0.004		30	5.498	0.476		30	2.802	0.066		30		0.26396
	31	4.314	0.296		31	5.974	0.02		31	2.868	0.06		31		0.334351
	32	4.61	0.11		32	5.994	0.576		32	2.928			32		0.275804
	33	4.72	0.148		33	6.57	0.57						33		0.248082
	34	4.868	0.002		34	7.14	0.03		33	0.116	0.184		34		0.029788
	35	4.87	0.008		35	7.17	0.36		34	0.3	0.154		35		0.075466
	36	4.878	0.032		36	7.53	0.22		35	0.454	0.114		36		0.02742
	37	4.91	0.006		37	7.75	0.29		36	0.568	0.09		37		0.397973
	38	4.916	0.076		38	8.04	0.016		37	0.658	0.012		38		0.294419
	39	4.992	0.088		39	8.056	0.362		38	0.67	0.072		39		0.24875
	40	5.08	0.07		40	8.418	0.154		39	0.742	0.504		40		0.017597
	41	5.15	0.17		41	8.572	0.012		40	1.246	0.17		41		1.35431
	42	5.32	0.21		42	8.584	0.146		41	1.416			42		0.404401
	43	5.53	0.12		43	8.73	0.25						43		0.016924
	44	5.65	0.23		44	8.98	0.46		42	0.16	0.068		44		0.012202
	45	5.88	0.11		45	9.44	0.27		43	0.228	0.002		45		0.169887
	46	5.99	0.2		46	9.71	0.008		44	0.23	0.096		46		0.013891
	47	6.19	0.13		47	9.718	0.032		45	0.326	0.518		47		0.052458
	48	6.32	0.21		48	9.75	0.294		46	0.844	0.04		48		0.118784
	49	6.53	0.13		49	10.044	0.014		47	0.884	0.08		49		0.538073
	50	6.66	0.08		50	10.058	0.158		48	0.964	0.088		50		0.170561
	51	6.74	0.15		51	10.216	0.012		49	1.052	0.074		51		0.045008
	52	6.89	0.21		52	10.228	0.304		50	1.126	0.002		52		0.118786
	53	7.1	0.16		53	10.532	0.006		51	1.128	0.022		53		0.021661
	54	7.26	0.26		54	10.538	0.352		52	1.15			54		0.212869
	55	7.52	0.14		55	10.89	0.13						55		0.483926
	56	7.66	0.24		56	11.02	0.004						56		0.183758
	57	7.9	0.07		57	11.024	0.318						57		0.015232
	58	7.97	0.15		58	11.342	0.188						58		0.857868
	59	8.12	0.21		59	11.53	0.022						59		0.012521
	60	8.33	0.17		60	11.552	0.128						60		0.026398
	61	8.5	0.14		61	11.68	0.164						61		0.142136
	62	8.64	0.26		62	11.844	0.012						62		0.047727
	63	8.9	0.17		63	11.856	0.184						63		0.149919
	64	9.07	0.11		64	12.04	0.01						64		0.235875
	65	9.18	0.13		65	12.05	0.148						65		0.756684
	66	9.31	0.26		66	12.198	0.01						66		0.583426
	67	9.57	0.24		67	12.208	0.008						67		0.777001
	68	9.81	0.29		68	12.216	0.198						68		0.046702
	69	10.1	0.34		69	12.414	0.082						69		0.114733
	70	10.44	0.25		70	12.496	0.164						70		0.403049
	71	10.69	0.06		71	12.66	0.276						71		0.293746
	72	10.75	0.17		72	12.936	0.004						72		0.032489
	73	10.92	0.15		73	12.94	0.04						73		0.027413
	74	11.07	0.06		74	12.98	0.09						74		0.036942
	75	11.13	0.1		75	13.07	0.19						75		0.294083
	76	11.23	0.05		76	13.26	0.008						76		0.219976
	77	11.28	0.1		77	13.268	0.208						77		0.277503
	78	11.38	0.21		78	13.476							78		0.004075
	79	11.59	0.02										79		0.030118
	80	11.61	0.03										80		0.851103
	81	11.64	0.14										81		0.03318
	82	11.78	0.17										82		0.027801
	83	11.95	0.16										83		0.615234
	84	12.11	0.35										84		0.056177
	85	12.46	0.29										85		0.51845
	86	12.75	0.01										86		1.15499
	87	12.76	0.15										87		0.016596
	88	12.91	0.34										88		1.18037
	89	13.25	0.26										89		0.163792
	90	13.51	0.01										90		0.280542
	91	13.52	0.1										91		0.011173
	92	13.62	0.09										92		0.02035
	93	13.71	0.03										93		0.016613
	94	13.74	0.19										94		0.015938
	95	13.93	0.18										95		0.004061
	96	14.11	0.22										96		0.129276
	97	14.33	0.17										97		0.078852
	98	14.5	0.34										98		0.028767
	99	14.84	0.27										99		0.020687
	100	15.11	0.12										100		0.06769
	101	15.23	0.22										101		0.049751
	102	15.45	0.02										102		1.77056
	103	15.47	0.26										103		0.039934
	104	15.73	0.02										104		0.006465
	105	15.75	0.22										105		0.24941
	106	15.97	0.11										106		0.065317
	107	16.08	0.24										107		0.011526
	108	16.32	0.15										108		0.359063
	109	16.47	0.11										109		0.267692
	110	16.58	0.05										110		0.023012
	111	16.63	0.01										111		0.546197
	112	16.64	0.09										112		0.080627
	113	16.73	0.23										113		0.039955
	114	16.96	0.19										114		0.154654
	115	17.15	0.01										115		0.011249
	116	17.16	0.28										116		0.238917
	117	17.44	0.16										117		0.00936
	118	17.6	0.1										118		0.225043
	119	17.7	0.2										119		0.089689
	120	17.9	0.25										120		0.066329
	121	18.15	0.12										121		0.062629
	122	18.27	0.26										122		1.14856
	123	18.53	0.28										123		0.202714
	124	18.81	0.23										124		0.031561
	125	19.04	0.21										125		0.251102
	126	19.25	0.26										126		0.80034
	127	19.51	0.17										127		0.023353
	128	19.68	0.16										128		0.313029
	129	19.84	0.22										129		0.135374
	130	20.06	0.07										130		0.124196
	131	20.13	0.17										131		0.051438
	132	20.3	0.24										132		0.099833
	133	20.54	0.34										133		0.038923
	134	20.88	0.13										134		0.013541
	135	21.01	0.17										135		0.314056
	136	21.18	0.23										136		0.411173
	137	21.41	0.28										137		0.034897
	138	21.69	0.4										138		0.381738
	139	22.09	0.13										139		0.69577
	140	22.22	0.13										140		2.1621
	141	22.35	0.15										141		0.063286
	142	22.5	0.16										142		0.121827
	143	22.66	0.08										143		1.34417
	144	22.74	0.32										144		0.147547
	145	23.06	0.02										145		0.860747
	146	23.08	0.31										146		0.749408
	147	23.39	0.35										147		0.119122
	148	23.74	0.09										148		0.026736
	149	23.83	0.29										149		0.154656
	150	24.12	0.14										150		0.26769
	151	24.26	0.44										151		0.013202
	152	24.7	0.11										152		0.014217
	153	24.81	0.39										153		0.011844
	154	25.2	0.01										154		0.030803
	155	25.21	0.03										155		0.140785
	156	25.24	0.08										156		0.145855
	157	25.32	0.15										157		0.340781
	158	25.47	0.15										158		0.098139
	159	25.62	0.37										159		1.00119
	160	25.99	0.74										160		0.053304
	161	26.73	1.06										161		1.13131
	162	27.79	0.03										162		0.570558
	163	27.82	0.18										163		0.1154
	164	28	0.11
	165	28.11	0.26
	166	28.37	0.36
	167	28.73	0.23
	168	28.96	0.42
	169	29.38	0.1
	170	29.48	0.33
	171	29.81	0.19
	172	30	0.4
	173	30.4	0.13
	174	30.53	0.39
	175	30.92	0.05
	176	30.97	0.15
	177	31.12	0.44
	178	31.56	0.06
	179	31.62	0.26
	180	31.88	0.04
	181	31.92	0.01
	182	31.93	0.17
	183	32.1	0.03
	184	32.13	0.23
	185	32.36	0.01
	186	32.37	0.28
	187	32.65	0.17
	188	32.82	0.01
	189	32.83	0.4
	190	33.23	0.04
	191	33.27	0.26
	192	33.53	0.12
	193	33.65	0.34
	194	33.99	0.08
	195	34.07	0.31
	196	34.38	0.01
	197	34.39	0.33
	198	34.72	0.08
	199	34.8	0.02
	200	34.82	0.26
	201	35.08	0.5
	202	35.58	0.47
	203	36.05	0.55
	204	36.6	0.02
	205	36.62	0.08
	206	36.7	0.6
	207	37.3	0.21
	208	37.51	0.01
	209	37.52	0.44
	210	37.96	0.22
	211	38.18

## Sheet: Set C Spacings
	Set C Macrofractures_Scanline Rt16-2
	Fracture	Position (m)	Spacing (m)
	1	1.5	2
	2	3.5	1.5
	3	5	5
	4	10	0.75
	5	10.75	0.2
	6	10.95	4.5
	7	15.45	2.5
	8	17.95	1.5
	9	19.45	1
	10	20.45	0.1
	11	20.55	0.05
	12	20.6	0.75
	13	21.35	0.25
	14	21.6	0.05
	15	21.65	1
	16	22.65	0.5
	17	23.15	0.4
	18	23.55	11
	19	34.55	0.5
	20	35.05	0.05
	21	35.1	0.4
	22	35.5	0.4
	23	35.9	0.2
	24	36.1

## Sheet: Set D Spacings
Set D Macrofracures_Scanline Rt16-3					Set D Microfractures_Scanline R16-3-2C-2
Fracture	Position	Spacing (m)			Fracture	Position	Spacing (mm)
1	2.18	0.72			1		0.303781
2	2.9	3.06			2		0.27509
3	5.96	0.69			3		0.378882
4	6.65	0.85			4		1.6497
5	7.5	0.88			5		0.238805
6	8.38	0.24			6		0.226992
7	8.62	1.38			7		0.0497863
8	10	0.95			8		0.498707
9	10.95	0.87			9		0.294499
10	11.82	1.03			10		1.02188
11	12.85	1.64			11		1.33326
12	14.49	0.33			12		1.24888
13	14.82	0.19			13		0.317282
14	15.01	0.69			14		0.262433
15	15.7	0.27			15		0.663255
16	15.97	0.44			16		0.0480986
17	16.41	0.96			17		0.223616
18	17.37	0.12			18		1.19993
19	17.49	0.5			19		0.255682
20	17.99	1.83			20		0.475079
21	19.82	0.84			21		0.741731
22	20.66	0.71			22		1.39908
23	21.37	0.25			23		1.87585
24	21.62	0.47			24		0.828646
25	22.09	0.23			25		0.593216
26	22.32	0.33			26		0.499551
27	22.65	0.19			27		0.0354411
28	22.84	0.51			28		1.74927
29	23.35	0.17			29		0.178893
30	23.52	0.55			30		1.98331
31	24.07	1.26			31		3.41134
32	25.33	0.42			32		0.044
33	25.75	0.37			33		0.257
34	26.12	0.42			34		0.0185
35	26.54	0.6			35		0.0705
36	27.14	0.23			36		0.052
37	27.37	0.11			37		0.2055
38	27.48	0.31			38		0.1995
39	27.79	0.61			39		0.380062
40	28.4	0.41			40		0.0990253
41	28.81	0.75			41		0.0606704
42	29.56	0.24			42		0.664585
43	29.8	0.69			43		0.017434
44	30.49	1.08			44		0.0341707
45	31.57	1.21			45		0.0160393
46	32.78	0.89			46		0.435851
47	33.67	0.35			47		0.546731
48	34.02	0.65			48		0.259418
49	34.67	1.09			49		0.813123
50	35.76	1.28			50		0.0543942
51	37.04	0.52			51		0.0920517
52	37.56	0.17			52		0.165275
53	37.73	0.16			53		0.330549
54	37.89	0.93			54		0.108788
55	38.82	1.23			55		0.0997227
56	40.05	0.4			56		0.460956
57	40.45				57		1.17157
					58		0.309628
					59		0.0111578
					60		0.0188288
					61		0.140867
					62		0.418417
					63		0.347286
					64		0.160393
					65		0.801965
					66		1.72597
					67		0.476298
					68		0.343102
					69		1.09625
					70		0.768492
					71		0.0201667
					72		0.0108333
					73		0.0131667
					74		0.668955
					75		0.925833
					76		0.344289
					77		1.74642
					78		0.0927617
					79		1.19788
					80
