# Supplementary material for: Diagenesis is key to unlocking outcrop fracture data suitable for quantitative extrapolation to geothermal targets
Source: Frontiers journal article supplement (doi:10.3389/feart.2025.1545052), 2025-04-02
Supplement: Table_5.xlsx [file Table_5.xlsx]

## Sheet: Set A - NNW lengths
SEM-CL NNW Traces								Outcrop 1D scanline NNW Fractures								SEL Phone LiDAR NNW Traces IYXC							SRF Phone LiDar NNW Traces using IXY nodes						SRF Phone LiDar NNW Traces using IXYC nodes						Drone NNW Traces RC							Drone NNW traces SRF
Area (m^2)	0.0009287							Scanline Length (m)	38.18							Area (m^2)	25.7681						Area NNW (m2)	14.9113					Area NNW (m2)	14.9113					Area (m^2)	481.779						Area (m^2)	249.941
Length FracPaQ export	Length (m)	duplicates	Length w/o dup	Frequency	Cum Freq	cum freq/area		Position (m)	Length (m)	duplicates	Length w/o dup	Frequency	Cum Freq	cum freq/area		FID	LENGTH (m)	Length w/o Dup	Frequency	Cum Freq	cum freq/ area		FID	Count	Orientation	Length (m)	Cum freq		FID	Count	Orientation	Length (m)	Cum freq		FID	LENGTH (m)	Length w/o Dup	Frequency	Cum Freq	cum freq/ area		FID	Length (m)	Cum Freq	cum freq/area
81.77	8.177e-05	8.177e-05	8.177e-05	1	731	787122		0.16	8.84	8.84	8.84	1	1	0.0261917		0	1.43238	1.43238	1	1	0.0388077		97	1	NNW	1.83793	0.0670633		61	1	NNW	2.62108	0.0670633		70	17.8886	17.8886	1	1	0.00207564		0	8.27121	1	0.00400095
92.02	9.202e-05	9.202e-05	9.202e-05	1	730	786045		0.43	5.6	5.6	5.6	1	2	0.0523834		1	1.24515	1.24515	1	2	0.0776155		122	2	NNW	1.82526	0.134127		97	2	NNW	2.48191	0.134127		1	16.1347	16.1347	1	2	0.00415128		304	7.50281	2	0.0080019
92.68	9.268e-05	9.268e-05	9.268e-05	1	729	784968		0.79	4.97	4.97	4.97	1	3	0.0785752		46	1.17907	1.17907	1	3	0.116423		15	3	NNW	1.51717	0.20119		52	3	NNW	1.95583	0.20119		234	14.6314	14.6314	1	3	0.00622693		368	5.90568	3	0.0120028
95.27	9.527e-05	9.527e-05	9.527e-05	1	728	783891		1.04	4.1	4.1	4.1	2	5	0.130959		2	1.15764	1.15764	1	4	0.155231		7	4	NNW	1.5018	0.268253		13	4	NNW	1.87322	0.268253		133	13.8074	13.8074	1	4	0.00830257		20	5.85349	4	0.0160038
95.87	9.587e-05	9.587e-05	9.587e-05	1	727	782815		1.17	4.1	Duplicate	3.99	1	6	0.15715		3	1.11481	1.11481	1	5	0.194039		57	5	NNW	1.26503	0.335316		19	5	NNW	1.83154	0.335316		190	13.692	13.692	1	5	0.0103782		238	5.82144	5	0.0200047
104.99	0.00010499	0.00010499	0.00010499	1	726	781738		1.22	3.99	3.99	3.9	1	7	0.183342		23	1.07986	1.07986	1	6	0.232846		13	6	NNW	1.24707	0.40238		15	6	NNW	1.83009	0.40238		144	12.6568	12.6568	1	6	0.0124539		326	5.65728	6	0.0240057
111.87	0.00011187	0.00011187	0.00011187	1	725	780661		1.49	3.9	3.9	3.64	1	8	0.209534		4	1.03929	1.03929	1	7	0.271654		31	7	NNW	1.24068	0.469443		122	7	NNW	1.82526	0.469443		198	12.2434	12.2434	1	7	0.0145295		108	4.99226	7	0.0280066
111.89	0.00011189	0.00011189	0.00011189	1	724	779584		1.56	3.64	3.64	3.55	1	9	0.235726		6	1.01863	1.01863	1	8	0.310462		60	8	NNW	1.08369	0.536506		7	8	NNW	1.5018	0.536506		24	11.6139	11.6139	1	8	0.0166051		1	4.95619	8	0.0320076
114.57	0.00011457	0.00011457	0.00011457	1	723	778508		1.65	3.55	3.55	3.43	1	10	0.261917		5	1.01404	1.01404	1	9	0.34927		9	9	NNW	1.0245	0.60357		62	9	NNW	1.44685	0.60357		136	11.5781	11.5781	1	9	0.0186808		191	4.85542	9	0.0360085
118.8	0.0001188	0.0001188	0.0001188	1	722	777431		1.69	3.43	3.43	3.42	1	11	0.288109		56	0.991957	0.991957	1	10	0.388077		19	10	NNW	0.968201	0.670633		9	10	NNW	1.39287	0.670633		206	10.9497	10.9497	1	10	0.0207564		332	4.5503	10	0.0400095
124.02	0.00012402	0.00012402	0.00012402	1	721	776354		1.9	3.42	3.42	3.4	1	12	0.314301		7	0.991152	0.991152	1	11	0.426885		37	11	NNW	0.937288	0.737696		57	11	NNW	1.32403	0.737696		203	10.7809	10.7809	1	11	0.0228321		416	4.40435	11	0.0440104
130.84	0.00013084	0.00013084	0.00013084	1	720	775277		1.96	3.4	3.4	3.3	1	13	0.340492		41	0.953356	0.953356	1	12	0.465693		123	12	NNW	0.927916	0.804759		31	12	NNW	1.30839	0.804759		240	10.7343	10.7343	1	12	0.0249077		396	4.28926	12	0.0480114
132.98	0.00013298	0.00013298	0.00013298	1	719	774200		2.18	3.3	3.3	3.29	1	14	0.366684		9	0.948422	0.948422	1	13	0.504501		76	13	NNW	0.921864	0.871823		73	13	NNW	1.28101	0.871823		187	10.7214	10.7214	1	13	0.0269833		86	4.22025	13	0.0520123
134.72	0.00013472	0.00013472	0.00013472	1	718	773124		2.42	3.29	3.29	3.26	1	15	0.392876		27	0.94501	0.94501	1	14	0.543308		10	14	NNW	0.914589	0.938886		3	14	NNW	1.20958	0.938886		131	10.682	10.682	1	14	0.029059		366	4.08606	14	0.0560133
136.85	0.00013685	0.00013685	0.00013685	1	717	772047		2.67	3.26	3.26	3.17	1	16	0.419068		30	0.944235	0.944235	1	15	0.582116		5	15	NNW	0.909588	1.00595		60	15	NNW	1.08369	1.00595		212	10.4954	10.4954	1	15	0.0311346		222	4.07738	15	0.0600142
140.77	0.00014077	0.00014077	0.00014077	1	716	770970		2.74	3.17	3.17	3.11	1	17	0.445259		8	0.942818	0.942818	1	16	0.620924		8	16	NNW	0.862515	1.07301		58	16	NNW	1.07476	1.07301		178	10.4335	10.4335	1	16	0.0332103		41	3.95434	16	0.0640152
149.71	0.00014971	0.00014971	0.00014971	1	715	769893		2.98	3.11	3.11	2.91	1	18	0.471451		14	0.907442	0.907442	1	17	0.659732		58	17	NNW	0.794522	1.14008		56	17	NNW	1.0505	1.14008		260	10.1968	10.1968	1	17	0.0352859		303	3.73239	17	0.0680161
151.25	0.00015125	0.00015125	0.00015125	1	714	768817		3.13	2.91	2.91	2.84	1	19	0.497643		10	0.899515	0.899515	1	18	0.698539		3	18	NNW	0.79341	1.20714		95	18	NNW	1.03263	1.20714		130	9.93939	9.93939	1	18	0.0373616		418	3.6722	18	0.0720171
161.81	0.00016181	0.00016181	0.00016181	1	713	767740		3.27	2.84	2.84	2.83	1	20	0.523834		11	0.883509	0.883509	1	19	0.737347		24	19	NNW	0.764879	1.2742		46	19	NNW	0.992864	1.2742		283	9.91813	9.91813	1	19	0.0394372		75	3.50171	19	0.076018
165.56	0.00016556	0.00016556	0.00016556	1	712	766663		3.33	2.83	2.83	2.79	2	22	0.576218		15	0.881422	0.881422	1	20	0.776155		38	20	NNW	0.757554	1.34127		37	20	NNW	0.937288	1.34127		111	9.84707	9.84707	1	20	0.0415128		320	3.44415	20	0.080019
166.33	0.00016633	0.00016633	0.00016633	1	711	765586		3.4	2.79	2.79	2.75	1	23	0.60241		12	0.879505	0.879505	1	21	0.814963		0	21	NNW	0.757457	1.40833		123	21	NNW	0.927916	1.40833		202	9.30564	9.30564	1	21	0.0435885		357	3.39477	21	0.0840199
166.43	0.00016643	0.00016643	0.00016643	1	710	764510		3.43	2.79	Duplicate	2.71	1	24	0.628601		13	0.878378	0.878378	1	22	0.85377		21	22	NNW	0.754162	1.47539		76	22	NNW	0.921864	1.47539		46	9.10741	9.10741	1	22	0.0456641		409	3.36442	22	0.0880209
169.42	0.00016942	0.00016942	0.00016942	1	709	763433		3.57	2.75	2.75	2.69	1	25	0.654793		16	0.859841	0.859841	1	23	0.892578		46	23	NNW	0.725375	1.54246		10	23	NNW	0.914589	1.54246		183	8.43644	8.43644	1	23	0.0477398		164	3.28257	23	0.0920218
170.07	0.00017007	0.00017007	0.00017007	1	708	762356		3.6	2.71	2.71	2.68	1	26	0.680985		51	0.841548	0.841548	1	24	0.931386		153	24	NNW	0.672995	1.60952		59	24	NNW	0.91299	1.60952		182	8.39522	8.39522	1	24	0.0498154		135	3.27808	24	0.0960228
172.91	0.00017291	0.00017291	0.00017291	1	707	761279		3.86	2.69	2.69	2.64	1	27	0.707177		17	0.829306	0.829306	1	25	0.970194		55	25	NNW	0.658106	1.67658		55	25	NNW	0.91234	1.67658		315	8.11297	8.11297	1	25	0.0518911		302	3.22951	25	0.100024
173.5	0.0001735	0.0001735	0.0001735	1	706	760202		3.92	2.68	2.68	2.62	1	28	0.733368		18	0.808992	0.808992	1	26	1.009		65	26	NNW	0.637099	1.74365		5	26	NNW	0.909588	1.74365		17	8.06836	8.06836	1	26	0.0539667		160	3.22946	26	0.104025
176.2	0.0001762	0.0001762	0.0001762	1	705	759126		4.05	2.64	2.64	2.52	1	29	0.75956		31	0.804265	0.804265	1	27	1.04781		170	27	NNW	0.636602	1.81071		24	27	NNW	0.886724	1.81071		157	7.93307	7.93307	1	27	0.0560423		301	3.20036	27	0.108026
177.87	0.00017787	0.00017787	0.00017787	1	704	758049		4.09	2.62	2.62	2.51	1	30	0.785752		21	0.78249	0.78249	1	28	1.08662		62	28	NNW	0.62038	1.87777		4	28	NNW	0.884509	1.87777		226	7.92916	7.92916	1	28	0.058118		98	3.18206	28	0.112027
180.1	0.0001801	0.0001801	0.0001801	1	703	756972		4.29	2.52	2.52	2.34	1	31	0.811943		88	0.776673	0.776673	1	29	1.12542		107	29	NNW	0.618353	1.94484		32	29	NNW	0.88422	1.94484		204	7.86888	7.86888	1	29	0.0601936		334	3.07392	29	0.116027
180.88	0.00018088	0.00018088	0.00018088	1	702	755895		4.31	2.51	2.51	2.29	1	32	0.838135		82	0.775299	0.775299	1	30	1.16423		56	30	NNW	0.607456	2.0119		8	30	NNW	0.862515	2.0119		119	7.78473	7.78473	1	30	0.0622693		161	3.07279	30	0.120028
181.18	0.00018118	0.00018118	0.00018118	1	701	754819		4.314	2.34	2.34	2.23	1	33	0.864327		70	0.771356	0.771356	1	31	1.20304		95	31	NNW	0.586085	2.07896		111	31	NNW	0.822387	2.07896		322	7.78269	7.78269	1	31	0.0643449		105	3.05385	31	0.124029
182.83	0.00018283	0.00018283	0.00018283	1	700	753742		4.61	2.29	2.29	2.21	1	34	0.890519		50	0.770945	0.770945	1	32	1.24185		27	32	NNW	0.575419	2.14603		38	32	NNW	0.757554	2.14603		266	7.74435	7.74435	1	32	0.0664206		139	3.03807	32	0.12803
184.58	0.00018458	0.00018458	0.00018458	1	699	752665		4.72	2.23	2.23	2.17	1	35	0.91671		22	0.768583	0.768583	1	33	1.28066		106	33	NNW	0.570301	2.21309		0	33	NNW	0.757457	2.21309		265	7.73105	7.73105	1	33	0.0684962		413	3.03036	33	0.132031
187.15	0.00018715	0.00018715	0.00018715	1	698	751588		4.868	2.21	2.21	2.14	1	36	0.942902		19	0.768543	0.768543	1	34	1.31946		171	34	NNW	0.561861	2.28015		21	34	NNW	0.754162	2.28015		77	7.73069	7.73069	1	34	0.0705718		141	2.98561	34	0.136032
188.86	0.00018886	0.00018886	0.00018886	1	697	750511		4.87	2.17	2.17	2.01	1	37	0.969094		20	0.760691	0.760691	1	35	1.35827		80	35	NNW	0.561488	2.34721		12	35	NNW	0.738975	2.34721		19	7.62326	7.62326	1	35	0.0726475		176	2.85905	35	0.140033
189.19	0.00018919	0.00018919	0.00018919	1	696	749435		4.878	2.14	2.14	2	1	38	0.995285		57	0.750517	0.750517	1	36	1.39708		4	36	NNW	0.55291	2.41428		18	36	NNW	0.729032	2.41428		120	7.61634	7.61634	1	36	0.0747231		83	2.79633	36	0.144034
192.79	0.00019279	0.00019279	0.00019279	1	695	748358		4.91	2.01	2.01	1.98	1	39	1.02148		48	0.746962	0.746962	1	37	1.43589		59	37	NNW	0.530188	2.48134		68	37	NNW	0.69293	2.48134		316	7.60076	7.60076	1	37	0.0767988		127	2.78891	37	0.148035
193.13	0.00019313	0.00019313	0.00019313	1	694	747281		4.916	2	2	1.97	1	40	1.04767		55	0.73683	0.73683	1	38	1.47469		32	38	NNW	0.524826	2.5484		65	38	NNW	0.637099	2.5484		181	7.57361	7.57361	1	38	0.0788744		293	2.78549	38	0.152036
195.05	0.00019505	0.00019505	0.00019505	1	693	746204		4.992	1.98	1.98	1.95	1	41	1.07386		24	0.731553	0.731553	1	39	1.5135		135	39	NNW	0.520973	2.61547		11	39	NNW	0.628962	2.61547		160	7.35478	7.35478	1	39	0.08095		243	2.77437	39	0.156037
198.66	0.00019866	0.00019866	0.00019866	1	692	745128		5.08	1.97	1.97	1.88	1	42	1.10005		32	0.724929	0.724929	1	40	1.55231		61	40	NNW	0.514899	2.68253		107	40	NNW	0.618353	2.68253		257	7.19805	7.19805	1	40	0.0830257		134	2.71384	40	0.160038
199.69	0.00019969	0.00019969	0.00019969	1	691	744051		5.15	1.95	1.95	1.86	1	43	1.12624		25	0.716007	0.716007	1	41	1.59112		44	41	NNW	0.498119	2.74959		27	41	NNW	0.575419	2.74959		37	7.11112	7.11112	1	41	0.0851013		148	2.67383	41	0.164039
200.97	0.00020097	0.00020097	0.00020097	1	690	742974		5.32	1.88	1.88	1.85	2	45	1.17863		26	0.715068	0.715068	1	42	1.62993		178	42	NNW	0.490806	2.81666		106	42	NNW	0.570301	2.81666		80	7.07649	7.07649	1	42	0.087177		85	2.67173	42	0.16804
201.24	0.00020124	0.00020124	0.00020124	1	689	741897		5.53	1.86	1.86	1.82	2	47	1.23101		99	0.71082	0.71082	1	43	1.66873		68	43	NNW	0.483405	2.88372		80	43	NNW	0.561488	2.88372		313	7.06791	7.06791	1	43	0.0892526		211	2.662	43	0.172041
202.41	0.00020241	0.00020241	0.00020241	1	688	740821		5.65	1.85	1.85	1.78	1	48	1.2572		102	0.707699	0.707699	1	44	1.70754		22	44	NNW	0.48257	2.95078		45	44	NNW	0.546182	2.95078		277	7.00308	7.00308	1	44	0.0913283		419	2.61615	44	0.176042
202.47	0.00020247	0.00020247	0.00020247	1	687	739744		5.88	1.85	Duplicate	1.74	2	50	1.30959		28	0.700405	0.700405	1	45	1.74635		183	45	NNW	0.482377	3.01785		70	45	NNW	0.521943	3.01785		91	6.98626	6.98626	1	45	0.0934039		369	2.61249	45	0.180043
204.13	0.00020413	0.00020413	0.00020413	1	686	738667		5.99	1.82	1.82	1.7	2	52	1.36197		29	0.684972	0.684972	1	46	1.78516		73	46	NNW	0.476631	3.08491		44	46	NNW	0.498119	3.08491		194	6.94998	6.94998	1	46	0.0954795		183	2.60792	46	0.184044
205.93	0.00020593	0.00020593	0.00020593	1	685	737590		6.19	1.82	Duplicate	1.69	2	54	1.41435		38	0.658334	0.658334	1	47	1.82396		11	47	NNW	0.476229	3.15197		22	47	NNW	0.48257	3.15197		10	6.91596	6.91596	1	47	0.0975552		423	2.60361	47	0.188045
206.75	0.00020675	0.00020675	0.00020675	1	684	736513		6.32	1.78	1.78	1.63	1	55	1.44054		35	0.653913	0.653913	1	48	1.86277		159	48	NNW	0.467415	3.21904		87	48	NNW	0.433898	3.21904		259	6.88458	6.88458	1	48	0.0996308		254	2.6036	48	0.192046
209.02	0.00020902	0.00020902	0.00020902	1	683	735437		6.53	1.74	1.74	1.57	3	58	1.51912		33	0.653227	0.653227	1	49	1.90158		136	49	NNW	0.453915	3.2861		51	49	NNW	0.428106	3.2861		95	6.81938	6.81938	1	49	0.101706		248	2.59683	49	0.196046
213.81	0.00021381	0.00021381	0.00021381	1	682	734360		6.66	1.74	Duplicate	1.56	1	59	1.54531		40	0.652794	0.652794	1	50	1.94039		87	50	NNW	0.433898	3.35316		96	50	NNW	0.420824	3.35316		83	6.81485	6.81485	1	50	0.103782		138	2.59312	50	0.200047
214.73	0.00021473	0.00021473	0.00021473	1	681	733283		6.74	1.7	1.7	1.55	1	60	1.5715		39	0.651493	0.651493	1	51	1.9792		164	51	NNW	0.42864	3.42023		69	51	NNW	0.417314	3.42023		220	6.78716	6.78716	1	51	0.105858		12	2.56379	51	0.204048
216.63	0.00021663	0.00021663	0.00021663	1	680	732206		6.89	1.7	Duplicate	1.54	1	61	1.5977		34	0.645269	0.645269	1	52	2.018		96	52	NNW	0.420824	3.48729		39	52	NNW	0.389731	3.48729		150	6.73598	6.73598	1	52	0.107933		69	2.55265	52	0.208049
217.64	0.00021764	0.00021764	0.00021764	1	679	731130		7.1	1.69	1.69	1.52	1	62	1.62389		37	0.638239	0.638239	1	53	2.05681		69	53	NNW	0.417314	3.55435		28	53	NNW	0.374565	3.55435		2	6.72634	6.72634	1	53	0.110009		170	2.54486	53	0.21205
221.93	0.00022193	0.00022193	0.00022193	1	678	730053		7.26	1.69	Duplicate	1.5	2	64	1.67627		36	0.637839	0.637839	1	54	2.09562		141	54	NNW	0.416202	3.62142		104	54	NNW	0.371512	3.62142		218	6.70537	6.70537	1	54	0.112085		363	2.53526	54	0.216051
222.04	0.00022204	0.00022204	0.00022204	1	677	728976		7.52	1.63	1.63	1.48	1	65	1.70246		43	0.628316	0.628316	1	55	2.13443		12	55	NNW	0.408529	3.68848		40	55	NNW	0.368339	3.68848		4	6.60256	6.60256	1	55	0.11416		111	2.51512	55	0.220052
223.69	0.00022369	0.00022369	0.00022369	1	676	727899		7.66	1.57	1.57	1.45	2	67	1.75485		44	0.620611	0.620611	1	56	2.17323		155	56	NNW	0.401705	3.75554		113	56	NNW	0.361505	3.75554		179	6.58369	6.58369	1	56	0.116236		57	2.4599	56	0.224053
224.57	0.00022457	0.00022457	0.00022457	1	675	726822		7.9	1.57	Duplicate	1.44	2	69	1.80723		45	0.611665	0.611665	1	57	2.21204		145	57	NNW	0.39305	3.82261		20	57	NNW	0.355588	3.82261		210	6.51628	6.51628	1	57	0.118312		19	2.43857	57	0.228054
224.72	0.00022472	0.00022472	0.00022472	1	674	725746		7.97	1.57	Duplicate	1.43	2	71	1.85961		42	0.611052	0.611052	1	58	2.25085		70	58	NNW	0.385082	3.88967		30	58	NNW	0.331963	3.88967		100	6.48742	6.48742	1	58	0.120387		414	2.42855	58	0.232055
226.08	0.00022608	0.00022608	0.00022608	1	673	724669		8.12	1.56	1.56	1.39	1	72	1.8858		111	0.599972	0.599972	1	59	2.28966		187	59	NNW	0.384147	3.95673		36	59	NNW	0.330321	3.95673		284	6.48609	6.48609	1	59	0.122463		84	2.36623	59	0.236056
226.12	0.00022612	0.00022612	0.00022612	1	672	723592		8.33	1.55	1.55	1.38	1	73	1.912		47	0.595062	0.595062	1	60	2.32846		143	60	NNW	0.377858	4.0238		66	60	NNW	0.325573	4.0238		63	6.45376	6.45376	1	60	0.124539		48	2.35175	60	0.240057
227.5	0.0002275	0.0002275	0.0002275	1	671	722515		8.5	1.54	1.54	1.3	1	74	1.93819		49	0.590399	0.590399	1	61	2.36727		28	61	NNW	0.374565	4.09086		6	61	NNW	0.324905	4.09086		285	6.3998	6.3998	1	61	0.126614		305	2.34724	61	0.244058
229.01	0.00022901	0.00022901	0.00022901	1	670	721439		8.64	1.52	1.52	1.29	2	76	1.99057		52	0.57784	0.57784	1	62	2.40608		139	62	NNW	0.368711	4.15792		88	62	NNW	0.317778	4.15792		5	6.31012	6.31012	1	62	0.12869		375	2.34547	62	0.248059
229.27	0.00022927	0.00022927	0.00022927	1	669	720362		8.9	1.5	1.5	1.26	3	79	2.06915		53	0.57598	0.57598	1	63	2.44489		40	63	NNW	0.368339	4.22499		35	63	NNW	0.312051	4.22499		270	6.27224	6.27224	1	63	0.130765		146	2.29785	63	0.25206
230.43	0.00023043	0.00023043	0.00023043	1	668	719285		9.07	1.5	Duplicate	1.23	1	80	2.09534		58	0.572966	0.572966	1	64	2.4837		181	64	NNW	0.366764	4.29205		25	64	NNW	0.311678	4.29205		8	6.09567	6.09567	1	64	0.132841		377	2.28043	64	0.256061
231.3	0.0002313	0.0002313	0.0002313	1	667	718208		9.18	1.48	1.48	1.22	2	82	2.14772		54	0.563378	0.563378	1	65	2.5225		113	65	NNW	0.361505	4.35911		64	65	NNW	0.303787	4.35911		6	6.04879	6.04879	1	65	0.134917		194	2.25204	65	0.260062
232.38	0.00023238	0.00023238	0.00023238	1	666	717131		9.31	1.45	1.45	1.21	1	83	2.17391		221	0.556076	0.556076	1	66	2.56131		179	66	NNW	0.360545	4.42618		78	66	NNW	0.298754	4.42618		272	6.01262	6.01262	1	66	0.136992		182	2.24539	66	0.264063
233.69	0.00023369	0.00023369	0.00023369	1	665	716055		9.57	1.45	Duplicate	1.15	1	84	2.2001		59	0.542701	0.542701	1	67	2.60012		104	67	NNW	0.351255	4.49324		75	67	NNW	0.296423	4.49324		41	5.92925	5.92925	1	67	0.139068		54	2.24356	67	0.268064
234.62	0.00023462	0.00023462	0.00023462	1	664	714978		9.81	1.44	1.44	1.14	1	85	2.2263		60	0.541713	0.541713	1	68	2.63893		147	68	NNW	0.350451	4.5603		23	68	NNW	0.284077	4.5603		9	5.85805	5.85805	1	68	0.141144		387	2.23581	68	0.272064
235.29	0.00023529	0.00023529	0.00023529	1	663	713901		10.1	1.44	Duplicate	1.12	1	86	2.25249		61	0.53679	0.53679	1	69	2.67773		161	69	NNW	0.338142	4.62737		89	69	NNW	0.263573	4.62737		189	5.79961	5.79961	1	69	0.143219		244	2.22871	69	0.276065
236.85	0.00023685	0.00023685	0.00023685	1	662	712824		10.44	1.43	1.43	1.11	1	87	2.27868		64	0.530949	0.530949	1	70	2.71654		30	70	NNW	0.331963	4.69443		34	70	NNW	0.249336	4.69443		59	5.72508	5.72508	1	70	0.145295		412	2.19805	70	0.280066
237.49	0.00023749	0.00023749	0.00023749	1	661	711748		10.69	1.43	Duplicate	1.1	1	88	2.30487		127	0.530318	0.530318	1	71	2.75535		165	71	NNW	0.331173	4.76149		26	71	NNW	0.233216	4.76149		0	5.71022	5.71022	1	71	0.147371		370	2.19214	71	0.284067
238.08	0.00023808	0.00023808	0.00023808	1	660	710671		10.75	1.39	1.39	1.07	2	90	2.35726		68	0.52726	0.52726	1	72	2.79416		36	72	NNW	0.330321	4.82856		33	72	NNW	0.231114	4.82856		86	5.56801	5.56801	1	72	0.149446		359	2.19097	72	0.288068
241.02	0.00024102	0.00024102	0.00024102	1	659	709594		10.92	1.38	1.38	1.06	1	91	2.38345		65	0.526261	0.526261	1	73	2.83297		66	73	NNW	0.325573	4.89562		47	73	NNW	0.211478	4.89562		176	5.53909	5.53909	1	73	0.151522		358	2.18865	73	0.292069
241.89	0.00024189	0.00024189	0.00024189	1	658	708517		11.07	1.3	1.3	1.05	2	93	2.43583		62	0.525025	0.525025	1	74	2.87177		6	74	NNW	0.324904	4.96268		72	74	NNW	0.192313	4.96268		53	5.53861	5.53861	1	74	0.153598		22	2.16661	74	0.29607
243.41	0.00024341	0.00024341	0.00024341	1	657	707441		11.13	1.29	1.29	1.04	1	94	2.46202		63	0.522717	0.522717	1	75	2.91058		149	75	NNW	0.31842	5.02975		100	75	NNW	0.162636	5.02975		65	5.49477	5.49477	1	75	0.155673		137	2.14954	75	0.300071
244.74	0.00024474	0.00024474	0.00024474	1	656	706364		11.23	1.29	Duplicate	1.03	1	95	2.48821		69	0.521775	0.521775	1	76	2.94939		88	76	NNW	0.317778	5.09681		110	76	NNW	0.132298	5.09681		18	5.38584	5.38584	1	76	0.157749		4	2.14476	76	0.304072
245.35	0.00024535	0.00024535	0.00024535	1	655	705287		11.28	1.26	1.26	1.02	1	96	2.51441		66	0.517738	0.517738	1	77	2.9882		35	77	NNW	0.312051	5.16387		102	77	NNW	0.124324	5.16387		121	5.37419	5.37419	1	77	0.159824		333	2.12345	77	0.308073
245.83	0.00024583	0.00024583	0.00024583	1	654	704210		11.38	1.26	Duplicate	1	1	97	2.5406		67	0.517085	0.517085	1	78	3.027		25	78	NNW	0.311678	5.23094		77	78	NNW	0.104384	5.23094		188	5.31275	5.31275	1	78	0.1619		154	2.11649	78	0.312074
246.05	0.00024605	0.00024605	0.00024605	1	653	703133		11.59	1.26	Duplicate	0.99	2	99	2.59298		71	0.512399	0.512399	1	79	3.06581		184	79	NNW	0.304184	5.298		43	79	NNW	0.0598246	5.298		104	5.28254	5.28254	1	79	0.163976		61	2.09394	79	0.316075
256.65	0.00025665	0.00025665	0.00025665	1	652	702057		11.61	1.23	1.23	0.98	1	100	2.61917		72	0.504562	0.504562	1	80	3.10462		64	80	NNW	0.303787	5.36506		14	80	NNW	0.0505205	5.36506		158	5.18917	5.18917	1	80	0.166051		157	2.05104	80	0.320076
256.94	0.00025694	0.00025694	0.00025694	1	651	700980		11.64	1.22	1.22	0.97	2	102	2.67156		77	0.503023	0.503023	1	81	3.14343		157	81	NNW	0.300968	5.43213		74	81	NNW	0.0425238	5.43213		211	5.16484	5.16484	1	81	0.168127		70	2.03642	81	0.324077
258.81	0.00025881	0.00025881	0.00025881	1	650	699903		11.78	1.22	Duplicate	0.96	1	103	2.69775		76	0.494249	0.494249	1	82	3.18224		78	82	NNW	0.298754	5.49919								21	5.14064	5.14064	1	82	0.170203		187	2.03074	82	0.328078
260.17	0.00026017	0.00026017	0.00026017	1	649	698826		11.95	1.21	1.21	0.95	1	104	2.72394		74	0.490667	0.490667	1	83	3.22104		75	83	NNW	0.296422	5.56625				min	0.0425238			250	5.13694	5.13694	1	83	0.172278		397	2.02749	83	0.332079
260.56	0.00026056	0.00026056	0.00026056	1	648	697750		12.11	1.15	1.15	0.92	1	105	2.75013		73	0.489735	0.489735	1	84	3.25985		18	84	NNW	0.29622	5.63332				max	2.62108			49	5.12117	5.12117	1	84	0.174354		169	2.00954	84	0.33608
261.58	0.00026158	0.00026158	0.00026158	1	647	696673		12.46	1.14	1.14	0.91	1	106	2.77632		75	0.486736	0.486736	1	85	3.29866		111	85	NNW	0.296033	5.70038				average	0.733106			333	5.07785	5.07785	1	85	0.17643		410	1.99821	85	0.340081
262.73	0.00026273	0.00026273	0.00026273	1	646	695596		12.75	1.12	1.12	0.9	2	108	2.82871		78	0.465965	0.465965	1	86	3.33747		144	86	NNW	0.287367	5.76744								177	4.94782	4.94782	1	86	0.178505		234	1.96451	86	0.344082
262.81	0.00026281	0.00026281	0.00026281	1	645	694519		12.76	1.11	1.11	0.89	4	112	2.93347		81	0.464489	0.464489	1	87	3.37627		131	87	NNW	0.28432	5.83451								23	4.86336	4.86336	1	87	0.180581		201	1.94672	87	0.348082
262.87	0.00026287	0.00026287	0.00026287	1	644	693442		12.91	1.1	1.1	0.85	1	113	2.95966		84	0.463584	0.463584	1	88	3.41508		23	88	NNW	0.284077	5.90157								332	4.64863	4.64863	1	88	0.182657		114	1.93075	88	0.352083
264.66	0.00026466	0.00026466	0.00026466	1	643	692366		13.25	1.07	1.07	0.84	3	116	3.03824		122	0.462918	0.462918	1	89	3.45389		142	89	NNW	0.275506	5.96863								99	4.61534	4.61534	1	89	0.184732		68	1.92547	89	0.356084
265.92	0.00026592	0.00026592	0.00026592	1	642	691289		13.51	1.07	Duplicate	0.83	2	118	3.09062		79	0.45976	0.45976	1	90	3.4927		193	90	NNW	0.272977	6.0357								62	4.58891	4.58891	1	90	0.186808		175	1.91803	90	0.360085
266.51	0.00026651	0.00026651	0.00026651	1	641	690212		13.52	1.06	1.06	0.81	2	120	3.14301		80	0.450931	0.450931	1	91	3.5315		45	91	NNW	0.27283	6.10276								102	4.58256	4.58256	1	91	0.188883		120	1.89837	91	0.364086
268.47	0.00026847	0.00026847	0.00026847	1	640	689135		13.62	1.05	1.05	0.8	3	123	3.22158		83	0.431386	0.431386	1	92	3.57031		188	92	NNW	0.264634	6.16982								97	4.48335	4.48335	1	92	0.190959		395	1.89549	92	0.368087
268.72	0.00026872	0.00026872	0.00026872	1	639	688059		13.71	1.05	Duplicate	0.77	1	124	3.24777		115	0.427564	0.427564	1	93	3.60912		176	93	NNW	0.263997	6.23689								195	4.46643	4.46643	1	93	0.193035		311	1.89219	93	0.372088
269.91	0.00026991	0.00026991	0.00026991	1	638	686982		13.74	1.04	1.04	0.76	2	126	3.30016		85	0.425873	0.425873	1	94	3.64793		132	94	NNW	0.263256	6.30395								289	4.45246	4.45246	1	94	0.19511		51	1.88459	94	0.376089
271.04	0.00027104	0.00027104	0.00027104	1	637	685905		13.93	1.03	1.03	0.74	2	128	3.35254		86	0.42256	0.42256	1	95	3.68674		51	95	NNW	0.26136	6.37101								310	4.43066	4.43066	1	95	0.197186		103	1.88134	95	0.38009
271.44	0.00027144	0.00027144	0.00027144	1	636	684828		14.11	1.02	1.02	0.72	2	130	3.40492		87	0.421798	0.421798	1	96	3.72554		177	96	NNW	0.250099	6.43808								294	4.41694	4.41694	1	96	0.199262		287	1.87832	96	0.384091
273.85	0.00027385	0.00027385	0.00027385	1	635	683751		14.33	1	1	0.69	2	132	3.45731		93	0.41928	0.41928	1	97	3.76435		34	97	NNW	0.249336	6.50514								242	4.41166	4.41166	1	97	0.201337		193	1.87378	97	0.388092
275.73	0.00027573	0.00027573	0.00027573	1	634	682675		14.5	0.99	0.99	0.68	1	133	3.4835		90	0.414575	0.414575	1	98	3.80316		158	98	NNW	0.242451	6.5722								282	4.38112	4.38112	1	98	0.203413		136	1.85624	98	0.392093
276.46	0.00027646	0.00027646	0.00027646	1	633	681598		14.84	0.99	Duplicate	0.67	2	135	3.53588		91	0.414418	0.414418	1	99	3.84197		137	99	NNW	0.241336	6.63927								81	4.36761	4.36761	1	99	0.205489		253	1.84939	99	0.396094
277.99	0.00027799	0.00027799	0.00027799	1	632	680521		15.11	0.98	0.98	0.66	1	136	3.56207		108	0.414103	0.414103	1	100	3.88077		52	100	NNW	0.237838	6.70633								269	4.34602	4.34602	1	100	0.207564		232	1.84066	100	0.400095
279.32	0.00027932	0.00027932	0.00027932	1	631	679444		15.23	0.97	0.97	0.65	4	140	3.66684		89	0.413191	0.413191	1	101	3.91958		26	101	NNW	0.233216	6.77339								237	4.26432	4.26432	1	101	0.20964		424	1.84014	101	0.404096
279.44	0.00027944	0.00027944	0.00027944	1	630	678368		15.45	0.97	Duplicate	0.63	1	141	3.69303		95	0.410493	0.410493	1	102	3.95839		20	102	NNW	0.232529	6.84045								7	4.26307	4.26307	1	102	0.211716		250	1.81903	102	0.408097
280.46	0.00028046	0.00028046	0.00028046	1	629	677291		15.47	0.96	0.96	0.62	1	142	3.71922		92	0.409846	0.409846	1	103	3.9972		33	103	NNW	0.231114	6.90752								288	4.24293	4.24293	1	103	0.213791		225	1.81856	103	0.412098
281.7	0.0002817	0.0002817	0.0002817	1	628	676214		15.73	0.95	0.95	0.61	2	144	3.77161		94	0.407911	0.407911	1	104	4.03601		138	104	NNW	0.230579	6.97458								222	4.14007	4.14007	1	104	0.215867		353	1.79847	104	0.416099
282.38	0.00028238	0.00028238	0.00028238	1	627	675137		15.75	0.92	0.92	0.6	2	146	3.82399		97	0.40383	0.40383	1	105	4.07481		172	105	NNW	0.228041	7.04164								52	4.1366	4.1366	1	105	0.217942		257	1.78507	105	0.4201
282.48	0.00028248	0.00028248	0.00028248	1	626	674061		15.97	0.91	0.91	0.59	1	147	3.85018		96	0.403735	0.403735	1	106	4.11362		191	106	NNW	0.226447	7.10871								168	4.11467	4.11467	1	106	0.220018		152	1.77784	106	0.424101
284.53	0.00028453	0.00028453	0.00028453	1	625	672984		16.08	0.9	0.9	0.58	4	151	3.95495		98	0.395032	0.395032	1	107	4.15243		162	107	NNW	0.225039	7.17577								267	4.02239	4.02239	1	107	0.222094		189	1.77766	107	0.428101
284.79	0.00028479	0.00028479	0.00028479	1	624	671907		16.32	0.9	Duplicate	0.57	2	153	4.00733		100	0.385394	0.385394	1	108	4.19124		47	108	NNW	0.211478	7.24283								214	4.01486	4.01486	1	108	0.224169		155	1.77273	108	0.432102
285.06	0.00028506	0.00028506	0.00028506	1	623	670830		16.47	0.89	0.89	0.56	3	156	4.08591		101	0.374087	0.374087	1	109	4.23004		152	109	NNW	0.206439	7.3099								128	4.01445	4.01445	1	109	0.226245		63	1.77111	109	0.436103
290.91	0.00029091	0.00029091	0.00029091	1	622	669753		16.58	0.89	Duplicate	0.55	2	158	4.13829		103	0.372395	0.372395	1	110	4.26885		39	110	NNW	0.205732	7.37696								174	3.93914	3.93914	1	110	0.228321		313	1.76714	110	0.440104
293.5	0.0002935	0.0002935	0.0002935	1	621	668677		16.63	0.89	Duplicate	0.54	2	160	4.19068		129	0.37239	0.37239	1	111	4.30766		150	111	NNW	0.191024	7.44402								76	3.9334	3.9334	1	111	0.230396		220	1.76244	111	0.444105
295.65	0.00029565	0.00029565	0.00029565	1	620	667600		16.64	0.89	Duplicate	0.53	1	161	4.21687		104	0.372139	0.372139	1	112	4.34647		174	112	NNW	0.187604	7.51109								264	3.92914	3.92914	1	112	0.232472		166	1.75925	112	0.448106
297.21	0.00029721	0.00029721	0.00029721	1	619	666523		16.73	0.85	0.85	0.52	1	162	4.24306		105	0.372114	0.372114	1	113	4.38528		182	113	NNW	0.182742	7.57815								139	3.92507	3.92507	1	113	0.234548		394	1.75821	113	0.452107
298.78	0.00029878	0.00029878	0.00029878	1	618	665446		16.96	0.84	0.84	0.51	3	165	4.32163		124	0.371833	0.371833	1	114	4.42408		151	114	NNW	0.182173	7.64521								151	3.89659	3.89659	1	114	0.236623		217	1.75648	114	0.456108
299.42	0.00029942	0.00029942	0.00029942	1	617	664370		17.15	0.84	Duplicate	0.5	2	167	4.37402		107	0.364345	0.364345	1	115	4.46289		89	115	NNW	0.173932	7.71228								205	3.88125	3.88125	1	115	0.238699		262	1.75344	115	0.460109
300.43	0.00030043	0.00030043	0.00030043	1	616	663293		17.16	0.84	Duplicate	0.47	2	169	4.4264		110	0.363227	0.363227	1	116	4.5017		192	116	NNW	0.17085	7.77934								186	3.84128	3.84128	1	116	0.240775		218	1.75057	116	0.46411
300.65	0.00030065	0.00030065	0.00030065	1	615	662216		17.44	0.83	0.83	0.46	1	170	4.45259		106	0.362928	0.362928	1	117	4.54051		160	117	NNW	0.17032	7.8464								161	3.8162	3.8162	1	117	0.24285		216	1.73782	117	0.468111
300.86	0.00030086	0.00030086	0.00030086	1	614	661139		17.6	0.83	Duplicate	0.45	2	172	4.50498		109	0.362538	0.362538	1	118	4.57931		173	118	NNW	0.168377	7.91347								50	3.81563	3.81563	1	118	0.244926		24	1.73197	118	0.472112
301.21	0.00030121	0.00030121	0.00030121	1	613	660062		17.7	0.81	0.81	0.44	3	175	4.58355		113	0.359333	0.359333	1	119	4.61812		146	119	NNW	0.16396	7.98053								327	3.76271	3.76271	1	119	0.247001		364	1.73117	119	0.476113
302.41	0.00030241	0.00030241	0.00030241	1	612	658986		17.9	0.81	Duplicate	0.43	2	177	4.63594		112	0.357851	0.357851	1	120	4.65693		100	120	NNW	0.162636	8.04759								239	3.75337	3.75337	1	120	0.249077		415	1.72465	120	0.480114
302.65	0.00030265	0.00030265	0.00030265	1	611	657909		18.15	0.8	0.8	0.42	1	178	4.66213		116	0.353081	0.353081	1	121	4.69574		186	121	NNW	0.159854	8.11466								303	3.72748	3.72748	1	121	0.251153		340	1.71784	121	0.484115
304.07	0.00030407	0.00030407	0.00030407	1	610	656832		18.27	0.8	Duplicate	0.41	2	180	4.71451		114	0.351106	0.351106	1	122	4.73455		185	122	NNW	0.154749	8.18172								243	3.5958	3.5958	1	122	0.253228		109	1.699	122	0.488116
306.66	0.00030666	0.00030666	0.00030666	1	609	655755		18.53	0.8	Duplicate	0.4	2	182	4.76689		119	0.349621	0.349621	1	123	4.77335		167	123	NNW	0.14535	8.24878								219	3.56582	3.56582	1	123	0.255304		381	1.68351	123	0.492117
310.79	0.00031079	0.00031079	0.00031079	1	608	654679		18.81	0.77	0.77	0.39	2	184	4.81928		118	0.348166	0.348166	1	124	4.81216		189	124	NNW	0.137116	8.31585								334	3.50864	3.50864	1	124	0.25738		60	1.68345	124	0.496118
314.83	0.00031483	0.00031483	0.00031483	1	607	653602		19.04	0.76	0.76	0.38	1	185	4.84547		128	0.348023	0.348023	1	125	4.85097		110	125	NNW	0.132298	8.38291								114	3.46501	3.46501	1	125	0.259455		336	1.66865	125	0.500119
315.19	0.00031519	0.00031519	0.00031519	1	606	652525		19.25	0.76	Duplicate	0.37	2	187	4.89785		144	0.3477	0.3477	1	126	4.88978		175	126	NNW	0.130651	8.44997								79	3.42873	3.42873	1	126	0.261531		236	1.66694	126	0.504119
315.53	0.00031553	0.00031553	0.00031553	1	605	651448		19.51	0.74	0.74	0.36	1	188	4.92404		123	0.346795	0.346795	1	127	4.92858		196	127	NNW	0.114808	8.51704								341	3.40888	3.40888	1	127	0.263607		322	1.66576	127	0.50812
315.78	0.00031578	0.00031578	0.00031578	1	604	650371		19.68	0.74	Duplicate	0.35	3	191	5.00262		120	0.346014	0.346014	1	128	4.96739		134	128	NNW	0.112657	8.5841								290	3.39574	3.39574	1	128	0.265682		172	1.64939	128	0.512121
317.27	0.00031727	0.00031727	0.00031727	1	603	649295		19.84	0.72	0.72	0.34	1	192	5.02881		117	0.344967	0.344967	1	129	5.0062		163	129	NNW	0.104758	8.65116								129	3.37048	3.37048	1	129	0.267758		107	1.6403	129	0.516122
318.51	0.00031851	0.00031851	0.00031851	1	602	648218		20.06	0.72	Duplicate	0.33	2	194	5.08119		126	0.344024	0.344024	1	130	5.04501		77	130	NNW	0.104384	8.71823								254	3.3622	3.3622	1	130	0.269833		347	1.63275	130	0.520123
319.97	0.00031997	0.00031997	0.00031997	1	601	647141		20.13	0.69	0.69	0.31	1	195	5.10739		125	0.343879	0.343879	1	131	5.08381		190	131	NNW	0.0998266	8.78529								126	3.3568	3.3568	1	131	0.271909		382	1.63248	131	0.524124
321.41	0.00032141	0.00032141	0.00032141	1	600	646064		20.3	0.69	Duplicate	0.3	1	196	5.13358		121	0.342294	0.342294	1	132	5.12262		156	132	NNW	0.0996398	8.85235								167	3.32824	3.32824	1	132	0.273985		388	1.62951	132	0.528125
321.8	0.0003218	0.0003218	0.0003218	1	599	644988		20.54	0.68	0.68	0.29	2	198	5.18596		156	0.337959	0.337959	1	133	5.16143		154	133	NNW	0.0989105	8.91942								132	3.32709	3.32709	1	133	0.27606		365	1.57915	133	0.532126
322.8	0.0003228	0.0003228	0.0003228	1	598	643911		20.88	0.67	0.67	0.28	2	200	5.23834		133	0.33363	0.33363	1	134	5.20024		169	134	NNW	0.0974758	8.98648								148	3.32132	3.32132	1	134	0.278136		168	1.57436	134	0.536127
323.84	0.00032384	0.00032384	0.00032384	1	597	642834		21.01	0.67	Duplicate	0.25	2	202	5.29073		137	0.32952	0.32952	1	135	5.23905		72	135	NNW	0.0900146	9.05354								12	3.30767	3.30767	1	135	0.280212		264	1.56489	135	0.540128
325.83	0.00032583	0.00032583	0.00032583	1	596	641757		21.18	0.66	0.66	0.21	1	203	5.31692		134	0.32658	0.32658	1	136	5.27785		194	136	NNW	0.079224	9.12061								215	3.29871	3.29871	1	136	0.282287		228	1.56451	136	0.544129
330.09	0.00033009	0.00033009	0.00033009	1	595	640681		21.41	0.65	0.65	0.2	1	204	5.34311		130	0.326323	0.326323	1	137	5.31666		140	137	NNW	0.0614706	9.18767								135	3.29748	3.29748	1	137	0.284363		337	1.5629	137	0.54813
330.25	0.00033025	0.00033025	0.00033025	1	594	639604		21.69	0.65	Duplicate	0.16	3	207	5.42169		136	0.326196	0.326196	1	138	5.35547		43	138	NNW	0.0598246	9.25473								66	3.2896	3.2896	1	138	0.286439		401	1.5548	138	0.552131
331.15	0.00033115	0.00033115	0.00033115	1	593	638527		22.09	0.65	Duplicate	0.14	1	208	5.44788		131	0.323221	0.323221	1	139	5.39428		195	139	NNW	0.0586185	9.3218								137	3.28553	3.28553	1	139	0.288514		288	1.54547	139	0.556132
331.35	0.00033135	0.00033135	0.00033135	1	592	637450		22.22	0.65	Duplicate	0.13	1	209	5.47407		132	0.320761	0.320761	1	140	5.43308		148	140	NNW	0.0560818	9.38886								122	3.27683	3.27683	1	140	0.29059		59	1.54466	140	0.560133
331.87	0.00033187	0.00033187	0.00033187	1	591	636373		22.35	0.63	0.63	0.06	2	211	5.52645		141	0.317267	0.317267	1	141	5.47189		102	141	NNW	0.0558599	9.45592								164	3.26004	3.26004	1	141	0.292666		422	1.54349	141	0.564134
332.22	0.00033222	0.00033222	0.00033222	1	590	635297		22.5	0.62	0.62	0.05	2	213	5.57884		135	0.316538	0.316538	1	142	5.5107		14	142	NNW	0.0505205	9.52299								48	3.25536	3.25536	1	142	0.294741		102	1.54146	142	0.568135
333.19	0.00033319	0.00033319	0.00033319	1	589	634220		22.66	0.61	0.61						143	0.315409	0.315409	1	143	5.54951		74	143	NNW	0.0425238	9.59005								32	3.24677	3.24677	1	143	0.296817		214	1.54093	143	0.572136
333.78	0.00033378	0.00033378	0.00033378	1	588	633143		22.74	0.61	Duplicate						138	0.314631	0.314631	1	144	5.58832														306	3.20517	3.20517	1	144	0.298892		62	1.5356	144	0.576137
336.79	0.00033679	0.00033679	0.00033679	1	587	632066		23.06	0.6	0.6						146	0.31357	0.31357	1	145	5.62712				min	0.0425238									200	3.17989	3.17989	1	145	0.300968		35	1.53459	145	0.580137
337.12	0.00033712	0.00033712	0.00033712	1	586	630990		23.08	0.6	Duplicate						142	0.313294	0.313294	1	146	5.66593				max	1.82526									163	3.16339	3.16339	1	146	0.303044		125	1.53363	146	0.584138
337.81	0.00033781	0.00033781	0.00033781	1	585	629913		23.39	0.59	0.59						139	0.309687	0.309687	1	147	5.70474				average	0.410075									92	3.13924	3.13924	1	147	0.305119		384	1.52491	147	0.588139
338.36	0.00033836	0.00033836	0.00033836	1	584	628836		23.74	0.58	0.58						145	0.309221	0.309221	1	148	5.74355														314	3.12688	3.12688	1	148	0.307195		314	1.52383	148	0.59214
341.13	0.00034113	0.00034113	0.00034113	1	583	627759		23.83	0.58	Duplicate						140	0.308032	0.308032	1	149	5.78235														13	3.1082	3.1082	1	149	0.309271		10	1.52086	149	0.596141
343.27	0.00034327	0.00034327	0.00034327	1	582	626682		24.12	0.58	Duplicate						150	0.305309	0.305309	1	150	5.82116														15	3.10316	3.10316	1	150	0.311346		230	1.51479	150	0.600142
343.93	0.00034393	0.00034393	0.00034393	1	581	625606		24.26	0.58	Duplicate						151	0.303803	0.303803	1	151	5.85997														22	3.08349	3.08349	1	151	0.313422		93	1.48641	151	0.604143
344.29	0.00034429	0.00034429	0.00034429	1	580	624529		24.7	0.57	0.57						148	0.303384	0.303384	1	152	5.89878														275	3.07955	3.07955	1	152	0.315498		47	1.47811	152	0.608144
345.94	0.00034594	0.00034594	0.00034594	1	579	623452		24.81	0.57	Duplicate						147	0.301633	0.301633	1	153	5.93759														340	3.07771	3.07771	1	153	0.317573		425	1.4687	153	0.612145
346.27	0.00034627	0.00034627	0.00034627	1	578	622375		25.2	0.56	0.56						155	0.301287	0.301287	1	154	5.97639														223	3.04704	3.04704	1	154	0.319649		21	1.45897	154	0.616146
349.37	0.00034937	0.00034937	0.00034937	1	577	621299		25.21	0.56	Duplicate						153	0.300513	0.300513	1	155	6.0152														287	3.03889	3.03889	1	155	0.321725		42	1.45872	155	0.620147
349.57	0.00034957	0.00034957	0.00034957	1	576	620222		25.24	0.56	Duplicate						149	0.300087	0.300087	1	156	6.05401														142	2.99793	2.99793	1	156	0.3238		133	1.44382	156	0.624148
350.11	0.00035011	0.00035011	0.00035011	2	575	619145		25.32	0.55	0.55						152	0.298498	0.298498	1	157	6.09282														271	2.99089	2.99089	1	157	0.325876		315	1.43969	157	0.628149
350.11	0.00035011	Duplicate	0.0003528	1	573	616991		25.47	0.55	Duplicate						154	0.296016	0.296016	1	158	6.13162														159	2.98159	2.98159	1	158	0.327951		190	1.43	158	0.63215
352.8	0.0003528	0.0003528	0.00035337	1	572	615915		25.62	0.54	0.54						177	0.294878	0.294878	1	159	6.17043														64	2.97841	2.97841	1	159	0.330027		99	1.42363	159	0.636151
353.37	0.00035337	0.00035337	0.00035355	1	571	614838		25.99	0.54	Duplicate						227	0.288901	0.288901	1	160	6.20924														197	2.93325	2.93325	1	160	0.332103		71	1.42322	160	0.640152
353.55	0.00035355	0.00035355	0.00035567	1	570	613761		26.73	0.53	0.53						268	0.282722	0.282722	1	161	6.24805														47	2.93075	2.93075	1	161	0.334178		285	1.42266	161	0.644153
355.67	0.00035567	0.00035567	0.00035605	1	569	612684		27.79	0.52	0.52						158	0.282518	0.282518	1	162	6.28685														90	2.88023	2.88023	1	162	0.336254		110	1.41822	162	0.648154
356.05	0.00035605	0.00035605	0.00035753	1	568	611608		27.82	0.51	0.51						159	0.279612	0.279612	1	163	6.32566														67	2.84799	2.84799	1	163	0.33833		350	1.40515	163	0.652155
357.53	0.00035753	0.00035753	0.00036033	1	567	610531		28	0.51	Duplicate						163	0.279527	0.279527	1	164	6.36447														323	2.84082	2.84082	1	164	0.340405		104	1.4046	164	0.656156
360.33	0.00036033	0.00036033	0.00036072	1	566	609454		28.11	0.51	Duplicate						157	0.278408	0.278408	1	165	6.40328														78	2.83547	2.83547	1	165	0.342481		310	1.40355	165	0.660156
360.72	0.00036072	0.00036072	0.00036093	1	565	608377		28.37	0.5	0.5						162	0.276035	0.276035	1	166	6.44209														331	2.83053	2.83053	1	166	0.344557		231	1.39786	166	0.664157
360.93	0.00036093	0.00036093	0.00036176	1	564	607301		28.73	0.5	Duplicate						167	0.274931	0.274931	1	167	6.48089														328	2.82087	2.82087	1	167	0.346632		129	1.39664	167	0.668158
361.76	0.00036176	0.00036176	0.00036234	1	563	606224		28.96	0.47	0.47						161	0.272867	0.272867	1	168	6.5197														58	2.82012	2.82012	1	168	0.348708		87	1.38981	168	0.672159
362.34	0.00036234	0.00036234	0.0003636	1	562	605147		29.38	0.47	Duplicate						160	0.271306	0.271306	1	169	6.55851														115	2.79841	2.79841	1	169	0.350784		362	1.38461	169	0.67616
363.6	0.0003636	0.0003636	0.00036364	1	561	604070		29.48	0.46	0.46						168	0.271034	0.271034	1	170	6.59732														312	2.79402	2.79402	1	170	0.352859		392	1.37981	170	0.680161
363.64	0.00036364	0.00036364	0.0003639	1	560	602993		29.81	0.45	0.45						165	0.270929	0.270929	1	171	6.63612														51	2.77817	2.77817	1	171	0.354935		380	1.37255	171	0.684162
363.9	0.0003639	0.0003639	0.00036441	1	559	601917		30	0.45	Duplicate						164	0.26272	0.26272	1	172	6.67493														325	2.77728	2.77728	1	172	0.35701		321	1.37077	172	0.688163
364.41	0.00036441	0.00036441	0.00036541	1	558	600840		30.4	0.44	0.44						166	0.261944	0.261944	1	173	6.71374														309	2.77526	2.77526	1	173	0.359086		260	1.36456	173	0.692164
365.41	0.00036541	0.00036541	0.000368	1	557	599763		30.53	0.44	Duplicate						169	0.256228	0.256228	1	174	6.75255														156	2.73578	2.73578	1	174	0.361162		283	1.36324	174	0.696165
368	0.000368	0.000368	0.00036901	1	556	598686		30.92	0.44	Duplicate						180	0.252202	0.252202	1	175	6.79136														108	2.67959	2.67959	1	175	0.363237		147	1.3592	175	0.700166
369.01	0.00036901	0.00036901	0.00036975	1	555	597610		30.97	0.43	0.43						170	0.25087	0.25087	1	176	6.83016														329	2.65638	2.65638	1	176	0.365313		198	1.35604	176	0.704167
369.75	0.00036975	0.00036975	0.00037224	1	554	596533		31.12	0.43	Duplicate						174	0.249673	0.249673	1	177	6.86897														14	2.6377	2.6377	1	177	0.367389		119	1.35487	177	0.708168
372.24	0.00037224	0.00037224	0.00037452	1	553	595456		31.56	0.42	0.42						171	0.249344	0.249344	1	178	6.90778														221	2.62306	2.62306	1	178	0.369464		140	1.34349	178	0.712169
374.52	0.00037452	0.00037452	0.00037458	1	552	594379		31.62	0.41	0.41						193	0.248704	0.248704	1	179	6.94659														20	2.61314	2.61314	1	179	0.37154		64	1.34329	179	0.71617
374.58	0.00037458	0.00037458	0.0003758	1	551	593302		31.88	0.41	Duplicate						179	0.247375	0.247375	1	180	6.98539														268	2.59912	2.59912	1	180	0.373616		91	1.34228	180	0.720171
375.8	0.0003758	0.0003758	0.00037612	1	550	592226		31.92	0.4	0.4						175	0.247156	0.247156	1	181	7.0242														82	2.58588	2.58588	1	181	0.375691		421	1.34182	181	0.724172
376.12	0.00037612	0.00037612	0.00037791	1	549	591149		31.93	0.4	Duplicate						173	0.246736	0.246736	1	182	7.06301														169	2.54055	2.54055	1	182	0.377767		323	1.34172	182	0.728173
377.91	0.00037791	0.00037791	0.00037907	1	548	590072		32.1	0.39	0.39						172	0.246532	0.246532	1	183	7.10182														107	2.51039	2.51039	1	183	0.379843		210	1.32737	183	0.732174
379.07	0.00037907	0.00037907	0.00038079	1	547	588995		32.13	0.39	Duplicate						182	0.241997	0.241997	1	184	7.14063														233	2.50881	2.50881	1	184	0.381918		271	1.32406	184	0.736174
380.79	0.00038079	0.00038079	0.00038101	1	546	587919		32.36	0.38	0.38						176	0.240138	0.240138	1	185	7.17943														145	2.50304	2.50304	1	185	0.383994		209	1.32022	185	0.740175
381.01	0.00038101	0.00038101	0.00038107	1	545	586842		32.37	0.37	0.37						178	0.236957	0.236957	1	186	7.21824														281	2.49608	2.49608	1	186	0.386069		96	1.31918	186	0.744176
381.07	0.00038107	0.00038107	0.00038165	1	544	585765		32.65	0.37	Duplicate						181	0.236553	0.236553	1	187	7.25705														16	2.45166	2.45166	1	187	0.388145		158	1.30336	187	0.748177
381.65	0.00038165	0.00038165	0.00038294	1	543	584688		32.82	0.36	0.36						183	0.234939	0.234939	1	188	7.29586														185	2.42988	2.42988	1	188	0.390221		115	1.28949	188	0.752178
382.94	0.00038294	0.00038294	0.0003843	1	542	583611		32.83	0.35	0.35						192	0.22793	0.22793	1	189	7.33466														263	2.41463	2.41463	1	189	0.392296		32	1.28521	189	0.756179
384.3	0.0003843	0.0003843	0.00038577	1	541	582535		33.23	0.35	Duplicate						185	0.227588	0.227588	1	190	7.37347														166	2.37927	2.37927	1	190	0.394372		263	1.28227	190	0.76018
385.77	0.00038577	0.00038577	0.00038652	1	540	581458		33.27	0.35	Duplicate						191	0.226921	0.226921	1	191	7.41228														291	2.37145	2.37145	1	191	0.396448		58	1.28119	191	0.764181
386.52	0.00038652	0.00038652	0.00038659	1	539	580381		33.53	0.34	0.34						184	0.224357	0.224357	1	192	7.45109														247	2.36278	2.36278	1	192	0.398523		123	1.27913	192	0.768182
386.59	0.00038659	0.00038659	0.00038775	1	538	579304		33.65	0.33	0.33						197	0.2243	0.2243	1	193	7.4899														175	2.35002	2.35002	1	193	0.400599		117	1.27828	193	0.772183
387.75	0.00038775	0.00038775	0.00038826	1	537	578228		33.99	0.33	Duplicate						199	0.22395	0.22395	1	194	7.5287														255	2.3246	2.3246	1	194	0.402675		226	1.27535	194	0.776184
388.26	0.00038826	0.00038826	0.00039119	1	536	577151		34.07	0.31	0.31						195	0.222785	0.222785	1	195	7.56751														170	2.32273	2.32273	1	195	0.40475		398	1.27527	195	0.780185
391.19	0.00039119	0.00039119	0.0003912	1	535	576074		34.38	0.3	0.3						188	0.2227	0.2227	1	196	7.60632														297	2.32145	2.32145	1	196	0.406826		126	1.27526	196	0.784186
391.2	0.0003912	0.0003912	0.00039263	1	534	574997		34.39	0.29	0.29						187	0.222519	0.222519	1	197	7.64513														127	2.31283	2.31283	1	197	0.408902		30	1.2723	197	0.788187
392.63	0.00039263	0.00039263	0.00039716	1	533	573921		34.72	0.29	Duplicate						186	0.222179	0.222179	1	198	7.68393														321	2.29863	2.29863	1	198	0.410977		28	1.26529	198	0.792188
397.16	0.00039716	0.00039716	0.00039774	1	532	572844		34.8	0.28	0.28						230	0.221457	0.221457	1	199	7.72274														228	2.29778	2.29778	1	199	0.413053		355	1.25569	199	0.796189
397.74	0.00039774	0.00039774	0.00040097	1	531	571767		34.82	0.28	Duplicate						189	0.219519	0.219519	1	200	7.76155														307	2.26527	2.26527	1	200	0.415128		267	1.25503	200	0.80019
400.97	0.00040097	0.00040097	0.00040292	1	530	570690		35.08	0.25	0.25						194	0.219053	0.219053	1	201	7.80036														227	2.24763	2.24763	1	201	0.417204		420	1.24198	201	0.804191
402.92	0.00040292	0.00040292	0.00040676	1	529	569613		35.58	0.25	Duplicate						190	0.218708	0.218708	1	202	7.83916														116	2.24197	2.24197	1	202	0.41928		237	1.24089	202	0.808192
406.76	0.00040676	0.00040676	0.00040765	1	528	568537		36.05	0.21	0.21						196	0.217541	0.217541	1	203	7.87797														149	2.20346	2.20346	1	203	0.421355		335	1.23033	203	0.812192
407.65	0.00040765	0.00040765	0.00040798	1	527	567460		36.6	0.2	0.2						204	0.213646	0.213646	1	204	7.91678														302	2.20023	2.20023	1	204	0.423431		43	1.22874	204	0.816193
407.98	0.00040798	0.00040798	0.00040808	1	526	566383		36.62	0.16	0.16						198	0.213437	0.213437	1	205	7.95559														191	2.16766	2.16766	1	205	0.425507		14	1.2248	205	0.820194
408.08	0.00040808	0.00040808	0.00040893	1	525	565306		36.7	0.16	Duplicate						200	0.212331	0.212331	1	206	7.9944														192	2.15456	2.15456	1	206	0.427582		393	1.2184	206	0.824195
408.93	0.00040893	0.00040893	0.00040897	1	524	564230		37.3	0.16	Duplicate						203	0.211614	0.211614	1	207	8.0332														28	2.13175	2.13175	1	207	0.429658		233	1.21681	207	0.828196
408.97	0.00040897	0.00040897	0.00040943	1	523	563153		37.51	0.14	0.14						201	0.210646	0.210646	1	208	8.07201														278	2.12985	2.12985	1	208	0.431734		97	1.20697	208	0.832197
409.43	0.00040943	0.00040943	0.0004102	1	522	562076		37.52	0.13	0.13						206	0.209338	0.209338	1	209	8.11082														311	2.12854	2.12854	1	209	0.433809		49	1.20672	209	0.836198
410.2	0.0004102	0.0004102	0.00041089	1	521	560999		37.96	0.06	0.06						202	0.20928	0.20928	1	210	8.14963														42	2.08883	2.08883	1	210	0.435885		174	1.20402	210	0.840199
410.89	0.00041089	0.00041089	0.00041145	1	520	559922		38	0.06	Duplicate						280	0.209089	0.209089	1	211	8.18843														56	2.08544	2.08544	1	211	0.437961		391	1.2003	211	0.8442
411.45	0.00041145	0.00041145	0.00041146	1	519	558846		38.18	0.05	0.05						205	0.206401	0.206401	1	212	8.22724														274	2.08411	2.08411	1	212	0.440036		294	1.19719	212	0.848201
411.46	0.00041146	0.00041146	0.00041239	1	518	557769										207	0.2049	0.2049	1	213	8.26605														296	2.07898	2.07898	1	213	0.442112		8	1.19022	213	0.852202
412.39	0.00041239	0.00041239	0.00041262	1	517	556692		Position and length are mismatched here ^^^								209	0.199719	0.199719	1	214	8.30486														201	2.07148	2.07148	1	214	0.444187		402	1.18823	214	0.856203
412.62	0.00041262	0.00041262	0.0004127	1	516	555615										208	0.198348	0.198348	1	215	8.34367														286	2.05506	2.05506	1	215	0.446263		181	1.18757	215	0.860204
412.7	0.0004127	0.0004127	0.00041376	1	515	554539										210	0.196412	0.196412	1	216	8.38247														123	2.04114	2.04114	1	216	0.448339		132	1.18304	216	0.864205
413.76	0.00041376	0.00041376	0.00041384	1	514	553462		212	0.05	min						215	0.196358	0.196358	1	217	8.42128														85	2.02285	2.02285	1	217	0.450414		149	1.18036	217	0.868206
413.84	0.00041384	0.00041384	0.00041452	1	513	552385			8.84	max						217	0.18958	0.18958	1	218	8.46009														39	2.01462	2.01462	1	218	0.45249		256	1.17287	218	0.872207
414.52	0.00041452	0.00041452	0.00041551	1	512	551308			1.27925	ave						212	0.189117	0.189117	1	219	8.4989														339	1.98455	1.98455	1	219	0.454566		144	1.17275	219	0.876208
415.51	0.00041551	0.00041551	0.00041647	1	511	550232										213	0.18832	0.18832	1	220	8.5377														27	1.98023	1.98023	1	220	0.456641		266	1.16454	220	0.880209
416.47	0.00041647	0.00041647	0.00041681	1	510	549155										214	0.187932	0.187932	1	221	8.57651														209	1.95881	1.95881	1	221	0.458717		213	1.16094	221	0.88421
416.81	0.00041681	0.00041681	0.00041853	1	509	548078										218	0.187639	0.187639	1	222	8.61532														74	1.94618	1.94618	1	222	0.460793		25	1.16039	222	0.888211
418.53	0.00041853	0.00041853	0.0004203	1	508	547001										211	0.187437	0.187437	1	223	8.65413														152	1.9065	1.9065	1	223	0.462868		31	1.15834	223	0.892211
420.3	0.0004203	0.0004203	0.00042055	1	507	545924										219	0.186651	0.186651	1	224	8.69294														162	1.8949	1.8949	1	224	0.464944		407	1.15734	224	0.896212
420.55	0.00042055	0.00042055	0.00042067	1	506	544848										216	0.184954	0.184954	1	225	8.73174														87	1.89032	1.89032	1	225	0.46702		27	1.15465	225	0.900213
420.67	0.00042067	0.00042067	0.00042217	1	505	543771										225	0.182403	0.182403	1	226	8.77055														292	1.87427	1.87427	1	226	0.469095		163	1.14893	226	0.904214
422.17	0.00042217	0.00042217	0.00042282	1	504	542694										222	0.182338	0.182338	1	227	8.80936														140	1.86156	1.86156	1	227	0.471171		34	1.14417	227	0.908215
422.82	0.00042282	0.00042282	0.000425	1	503	541617										220	0.182194	0.182194	1	228	8.84817														155	1.85005	1.85005	1	228	0.473246		408	1.14179	228	0.912216
425	0.000425	0.000425	0.00042539	1	502	540541										226	0.180054	0.180054	1	229	8.88697														301	1.84504	1.84504	1	229	0.475322		65	1.13173	229	0.916217
425.39	0.00042539	0.00042539	0.00042595	1	501	539464										224	0.179611	0.179611	1	230	8.92578														153	1.84336	1.84336	1	230	0.477398		292	1.12842	230	0.920218
425.95	0.00042595	0.00042595	0.00042841	1	500	538387										223	0.178614	0.178614	1	231	8.96459														207	1.84052	1.84052	1	231	0.479473		296	1.1254	231	0.924219
428.41	0.00042841	0.00042841	0.00042881	1	499	537310										232	0.173837	0.173837	1	232	9.0034														117	1.83692	1.83692	1	232	0.481549		40	1.12249	232	0.92822
428.81	0.00042881	0.00042881	0.00042928	1	498	536233										229	0.173168	0.173168	1	233	9.04221														96	1.82895	1.82895	1	233	0.483625		212	1.12185	233	0.932221
429.28	0.00042928	0.00042928	0.00043144	1	497	535157										228	0.172399	0.172399	1	234	9.08101														147	1.82665	1.82665	1	234	0.4857		331	1.12062	234	0.936222
431.44	0.00043144	0.00043144	0.00043171	1	496	534080										231	0.172207	0.172207	1	235	9.11982														208	1.82209	1.82209	1	235	0.487776		284	1.11593	235	0.940223
431.71	0.00043171	0.00043171	0.00043194	1	495	533003										241	0.171021	0.171021	1	236	9.15863														172	1.81041	1.81041	1	236	0.489852		9	1.11178	236	0.944224
431.94	0.00043194	0.00043194	0.00043249	1	494	531926										233	0.168507	0.168507	1	237	9.19744														199	1.80282	1.80282	1	237	0.491927		404	1.11117	237	0.948225
432.49	0.00043249	0.00043249	0.00043333	1	493	530850										237	0.168417	0.168417	1	238	9.23624														344	1.79363	1.79363	1	238	0.494003		346	1.10663	238	0.952226
433.33	0.00043333	0.00043333	0.00043378	1	492	529773										234	0.168153	0.168153	1	239	9.27505														326	1.7819	1.7819	1	239	0.496079		406	1.10583	239	0.956227
433.78	0.00043378	0.00043378	0.00043464	1	491	528696										235	0.167338	0.167338	1	240	9.31386														229	1.76683	1.76683	1	240	0.498154		405	1.09773	240	0.960228
434.64	0.00043464	0.00043464	0.00043681	1	490	527619										236	0.16692	0.16692	1	241	9.35267														273	1.76568	1.76568	1	241	0.50023		276	1.09402	241	0.964229
436.81	0.00043681	0.00043681	0.00043728	1	489	526542										239	0.164224	0.164224	1	242	9.39147														29	1.76131	1.76131	1	242	0.502305		235	1.08962	242	0.968229
437.28	0.00043728	0.00043728	0.00043785	1	488	525466										238	0.163592	0.163592	1	243	9.43028														43	1.75285	1.75285	1	243	0.504381		356	1.08714	243	0.97223
437.85	0.00043785	0.00043785	0.00043802	1	487	524389										240	0.162903	0.162903	1	244	9.46909														44	1.74412	1.74412	1	244	0.506457		373	1.08458	244	0.976231
438.02	0.00043802	0.00043802	0.00044057	1	486	523312										242	0.160165	0.160165	1	245	9.5079														343	1.74168	1.74168	1	245	0.508532		204	1.08316	245	0.980232
440.57	0.00044057	0.00044057	0.00044094	1	485	522235										330	0.159973	0.159973	1	246	9.54671														105	1.73262	1.73262	1	246	0.510608		173	1.08014	246	0.984233
440.94	0.00044094	0.00044094	0.0004421	1	484	521159										244	0.159614	0.159614	1	247	9.58551														217	1.72869	1.72869	1	247	0.512684		185	1.0801	247	0.988234
442.1	0.0004421	0.0004421	0.00044459	1	483	520082										243	0.158793	0.158793	1	248	9.62432														33	1.72076	1.72076	1	248	0.514759		101	1.0787	248	0.992235
444.59	0.00044459	0.00044459	0.00044716	1	482	519005										246	0.157569	0.157569	1	249	9.66313														230	1.70912	1.70912	1	249	0.516835		94	1.07401	249	0.996236
447.16	0.00044716	0.00044716	0.00044747	1	481	517928										245	0.156985	0.156985	1	250	9.70194														75	1.70487	1.70487	1	250	0.518911		7	1.06685	250	1.00024
447.47	0.00044747	0.00044747	0.00044748	1	480	516852										253	0.154319	0.154319	1	251	9.74074														342	1.69324	1.69324	1	251	0.520986		241	1.06543	251	1.00424
447.48	0.00044748	0.00044748	0.0004482	1	479	515775										248	0.154306	0.154306	1	252	9.77955														180	1.67641	1.67641	1	252	0.523062		349	1.06344	252	1.00824
448.2	0.0004482	0.0004482	0.00044891	1	478	514698										247	0.153968	0.153968	1	253	9.81836														261	1.65725	1.65725	1	253	0.525137		242	1.05859	253	1.01224
448.91	0.00044891	0.00044891	0.00044935	1	477	513621										270	0.153894	0.153894	1	254	9.85717														244	1.64335	1.64335	1	254	0.527213		167	1.05473	254	1.01624
449.35	0.00044935	0.00044935	0.00045052	1	476	512544										250	0.152146	0.152146	1	255	9.89598														245	1.64048	1.64048	1	255	0.529289		44	1.05344	255	1.02024
450.52	0.00045052	0.00045052	0.00045275	1	475	511468										254	0.151332	0.151332	1	256	9.93478														299	1.62195	1.62195	1	256	0.531364		18	1.053	256	1.02424
452.75	0.00045275	0.00045275	0.00045303	1	474	510391										249	0.150315	0.150315	1	257	9.97359														253	1.62193	1.62193	1	257	0.53344		265	1.05182	257	1.02824
453.03	0.00045303	0.00045303	0.00045346	1	473	509314										252	0.148103	0.148103	1	258	10.0124														112	1.60687	1.60687	1	258	0.535516		316	1.04947	258	1.03224
453.46	0.00045346	0.00045346	0.00045354	1	472	508237										303	0.147732	0.147732	1	259	10.0512														252	1.58668	1.58668	1	259	0.537591		343	1.04242	259	1.03625
453.54	0.00045354	0.00045354	0.00045524	1	471	507161										256	0.147508	0.147508	1	260	10.09														141	1.57426	1.57426	1	260	0.539667		268	1.03207	260	1.04025
455.24	0.00045524	0.00045524	0.00045545	1	470	506084										251	0.147275	0.147275	1	261	10.1288														143	1.5584	1.5584	1	261	0.541743		325	1.02942	261	1.04425
455.45	0.00045545	0.00045545	0.00045807	1	469	505007										255	0.145744	0.145744	1	262	10.1676														335	1.54095	1.54095	1	262	0.543818		156	1.02876	262	1.04825
458.07	0.00045807	0.00045807	0.0004581	1	468	503930										257	0.14207	0.14207	1	263	10.2064														118	1.52819	1.52819	1	263	0.545894		308	1.0263	263	1.05225
458.1	0.0004581	0.0004581	0.00045825	1	467	502853										261	0.13893	0.13893	1	264	10.2452														113	1.5166	1.5166	1	264	0.54797		77	1.0236	264	1.05625
458.25	0.00045825	0.00045825	0.00046008	1	466	501777										323	0.138654	0.138654	1	265	10.2841														246	1.51592	1.51592	1	265	0.550045		205	1.02295	265	1.06025
460.08	0.00046008	0.00046008	0.00046128	1	465	500700										258	0.13826	0.13826	1	266	10.3229														258	1.51082	1.51082	1	266	0.552121		297	1.01611	266	1.06425
461.28	0.00046128	0.00046128	0.00046338	1	464	499623										267	0.137982	0.137982	1	267	10.3617														231	1.50867	1.50867	1	267	0.554196		89	1.01589	267	1.06825
463.38	0.00046338	0.00046338	0.00046446	1	463	498546										264	0.137137	0.137137	1	268	10.4005														213	1.49089	1.49089	1	268	0.556272		184	1.01434	268	1.07225
464.46	0.00046446	0.00046446	0.00046789	1	462	497470										259	0.136965	0.136965	1	269	10.4393														26	1.46145	1.46145	1	269	0.558348		240	1.01053	269	1.07626
467.89	0.00046789	0.00046789	0.00046827	1	461	496393										271	0.136154	0.136154	1	270	10.4781														248	1.44335	1.44335	1	270	0.560423		286	1.00424	270	1.08026
468.27	0.00046827	0.00046827	0.00047235	1	460	495316										260	0.135742	0.135742	1	271	10.5169														124	1.43136	1.43136	1	271	0.562499		37	1.0026	271	1.08426
472.35	0.00047235	0.00047235	0.00047578	1	459	494239										262	0.1356	0.1356	1	272	10.5557														173	1.42221	1.42221	1	272	0.564575		312	0.997715	272	1.08826
475.78	0.00047578	0.00047578	0.00047715	1	458	493162										266	0.134101	0.134101	1	273	10.5945														30	1.41019	1.41019	1	273	0.56665		338	0.996925	273	1.09226
477.15	0.00047715	0.00047715	0.0004792	1	457	492086										269	0.132707	0.132707	1	274	10.6333														345	1.40574	1.40574	1	274	0.568726		203	0.993895	274	1.09626
479.2	0.0004792	0.0004792	0.00047947	1	456	491009										265	0.13229	0.13229	1	275	10.6721														11	1.39706	1.39706	1	275	0.570802		118	0.979044	275	1.10026
479.47	0.00047947	0.00047947	0.00048252	1	455	489932										263	0.132115	0.132115	1	276	10.7109														184	1.38308	1.38308	1	276	0.572877		426	0.971943	276	1.10426
482.52	0.00048252	0.00048252	0.00048544	1	454	488855										272	0.12965	0.12965	1	277	10.7497														71	1.3742	1.3742	1	277	0.574953		371	0.963215	277	1.10826
485.44	0.00048544	0.00048544	0.00048716	1	453	487779										274	0.128087	0.128087	1	278	10.7886														317	1.37368	1.37368	1	278	0.577029		143	0.953213	278	1.11226
487.16	0.00048716	0.00048716	0.00048788	1	452	486702										276	0.12701	0.12701	1	279	10.8274														330	1.36111	1.36111	1	279	0.579104		324	0.952645	279	1.11626
487.88	0.00048788	0.00048788	0.00048857	1	451	485625										273	0.126334	0.126334	1	280	10.8662														305	1.34056	1.34056	1	280	0.58118		52	0.951778	280	1.12027
488.57	0.00048857	0.00048857	0.00049013	1	450	484548										275	0.12313	0.12313	1	281	10.905														68	1.32282	1.32282	1	281	0.583255		195	0.950799	281	1.12427
490.13	0.00049013	0.00049013	0.00049084	1	449	483472										277	0.122663	0.122663	1	282	10.9438														154	1.31785	1.31785	1	282	0.585331		399	0.950764	282	1.12827
490.84	0.00049084	0.00049084	0.00049119	1	448	482395										282	0.122434	0.122434	1	283	10.9826														216	1.31543	1.31543	1	283	0.587407		3	0.948708	283	1.13227
491.19	0.00049119	0.00049119	0.00049373	1	447	481318										279	0.120873	0.120873	1	284	11.0214														146	1.30347	1.30347	1	284	0.589482		229	0.947193	284	1.13627
493.73	0.00049373	0.00049373	0.00049388	1	446	480241										281	0.120551	0.120551	1	285	11.0602														338	1.30172	1.30172	1	285	0.591558		88	0.94383	285	1.14027
493.88	0.00049388	0.00049388	0.00049496	1	445	479164										278	0.119239	0.119239	1	286	11.099														165	1.28665	1.28665	1	286	0.593634		351	0.943534	286	1.14427
494.96	0.00049496	0.00049496	0.00049536	1	444	478088										285	0.118412	0.118412	1	287	11.1378														69	1.27277	1.27277	1	287	0.595709		223	0.933435	287	1.14827
495.36	0.00049536	0.00049536	0.00049753	1	443	477011										290	0.115343	0.115343	1	288	11.1766														337	1.2511	1.2511	1	288	0.597785		309	0.929798	288	1.15227
497.53	0.00049753	0.00049753	0.00049775	1	442	475934										289	0.11453	0.11453	1	289	11.2154														238	1.24625	1.24625	1	289	0.599861		383	0.925151	289	1.15627
497.75	0.00049775	0.00049775	0.00049912	1	441	474857										283	0.114034	0.114034	1	290	11.2542														241	1.24079	1.24079	1	290	0.601936		386	0.922721	290	1.16027
499.12	0.00049912	0.00049912	0.00049932	1	440	473781										287	0.112683	0.112683	1	291	11.2931														38	1.23072	1.23072	1	291	0.604012		180	0.921518	291	1.16428
499.32	0.00049932	0.00049932	0.00050041	1	439	472704										286	0.112509	0.112509	1	292	11.3319														34	1.2209	1.2209	1	292	0.606088		122	0.916769	292	1.16828
500.41	0.00050041	0.00050041	0.00050159	1	438	471627										331	0.112392	0.112392	1	293	11.3707														110	1.21709	1.21709	1	293	0.608163		145	0.916188	293	1.17228
501.59	0.00050159	0.00050159	0.00050239	1	437	470550										361	0.111782	0.111782	1	294	11.4095														249	1.20901	1.20901	1	294	0.610239		224	0.912159	294	1.17628
502.39	0.00050239	0.00050239	0.00050243	1	436	469473										291	0.110989	0.110989	1	295	11.4483														36	1.20354	1.20354	1	295	0.612314		239	0.907831	295	1.18028
502.43	0.00050243	0.00050243	0.00050261	1	435	468397										284	0.110631	0.110631	1	296	11.4871														318	1.18713	1.18713	1	296	0.61439		128	0.904488	296	1.18428
502.61	0.00050261	0.00050261	0.00050338	1	434	467320										288	0.110609	0.110609	1	297	11.5259														73	1.15413	1.15413	1	297	0.616466		66	0.903296	297	1.18828
503.38	0.00050338	0.00050338	0.00050604	1	433	466243										321	0.10883	0.10883	1	298	11.5647														125	1.14969	1.14969	1	298	0.618541		73	0.892493	298	1.19228
506.04	0.00050604	0.00050604	0.00050612	1	432	465166										296	0.108642	0.108642	1	299	11.6035														55	1.13161	1.13161	1	299	0.620617		116	0.889746	299	1.19628
506.12	0.00050612	0.00050612	0.00050708	1	431	464090										297	0.108371	0.108371	1	300	11.6423														35	1.12973	1.12973	1	300	0.622693		15	0.881726	300	1.20028
507.08	0.00050708	0.00050708	0.00050806	1	430	463013										292	0.107911	0.107911	1	301	11.6811														336	1.11695	1.11695	1	301	0.624768		106	0.875932	301	1.20429
508.06	0.00050806	0.00050806	0.00050963	1	429	461936										293	0.10673	0.10673	1	302	11.7199														103	1.11126	1.11126	1	302	0.626844		2	0.873985	302	1.20829
509.63	0.00050963	0.00050963	0.00051089	1	428	460859										294	0.106319	0.106319	1	303	11.7587														235	1.10739	1.10739	1	303	0.62892		361	0.861001	303	1.21229
510.89	0.00051089	0.00051089	0.00051243	1	427	459782										329	0.106294	0.106294	1	304	11.7976														45	1.10357	1.10357	1	304	0.630995		197	0.85912	304	1.21629
512.43	0.00051243	0.00051243	0.00051249	1	426	458706										306	0.105898	0.105898	1	305	11.8364														40	1.07701	1.07701	1	305	0.633071		74	0.855247	305	1.22029
512.49	0.00051249	0.00051249	0.00051465	1	425	457629										295	0.105373	0.105373	1	306	11.8752														94	1.05703	1.05703	1	306	0.635147		45	0.854716	306	1.22429
514.65	0.00051465	0.00051465	0.00051682	1	424	456552										298	0.104734	0.104734	1	307	11.914														31	1.05562	1.05562	1	307	0.637222		427	0.850312	307	1.22829
516.82	0.00051682	0.00051682	0.00051896	1	423	455475										300	0.103627	0.103627	1	308	11.9528														61	1.03135	1.03135	1	308	0.639298		13	0.844465	308	1.23229
518.96	0.00051896	0.00051896	0.00052407	1	422	454399										299	0.101745	0.101745	1	309	11.9916														276	1.02441	1.02441	1	309	0.641373		56	0.840424	309	1.23629
524.07	0.00052407	0.00052407	0.00052445	1	421	453322										301	0.101554	0.101554	1	310	12.0304														3	1.00696	1.00696	1	310	0.643449		207	0.838586	310	1.24029
524.45	0.00052445	0.00052445	0.00052466	1	420	452245										302	0.098883	0.098883	1	311	12.0692														225	1.00431	1.00431	1	311	0.645525		186	0.835659	311	1.24429
524.66	0.00052466	0.00052466	0.00052557	1	419	451168										316	0.0983415	0.0983415	1	312	12.108														324	1.00113	1.00113	1	312	0.6476		124	0.834408	312	1.2483
525.57	0.00052557	0.00052557	0.0005303	1	418	450092										304	0.0972823	0.0972823	1	313	12.1468														256	0.997954	0.997954	1	313	0.649676		275	0.832951	313	1.2523
530.3	0.0005303	0.0005303	0.00053039	1	417	449015										307	0.0964508	0.0964508	1	314	12.1856														293	0.992412	0.992412	1	314	0.651752		372	0.827028	314	1.2563
530.39	0.00053039	0.00053039	0.00053152	1	416	447938										308	0.0958288	0.0958288	1	315	12.2244														308	0.99083	0.99083	1	315	0.653827		378	0.82155	315	1.2603
531.52	0.00053152	0.00053152	0.00053239	1	415	446861										305	0.0952579	0.0952579	1	316	12.2632														25	0.986598	0.986598	1	316	0.655903		354	0.82088	316	1.2643
532.39	0.00053239	0.00053239	0.00053251	1	414	445784										309	0.094792	0.094792	1	317	12.3021														101	0.984539	0.984539	1	317	0.657979		178	0.8201	317	1.2683
532.51	0.00053251	0.00053251	0.00053306	1	413	444708										312	0.0928825	0.0928825	1	318	12.3409														72	0.977542	0.977542	1	318	0.660054		199	0.819841	318	1.2723
533.06	0.00053306	0.00053306	0.00053313	1	412	443631										311	0.0924917	0.0924917	1	319	12.3797														251	0.976699	0.976699	1	319	0.66213		417	0.817265	319	1.2763
533.13	0.00053313	0.00053313	0.00053355	1	411	442554										310	0.0921924	0.0921924	1	320	12.4185														171	0.966639	0.966639	1	320	0.664206		374	0.816055	320	1.2803
533.55	0.00053355	0.00053355	0.00053474	1	410	441477										313	0.0914737	0.0914737	1	321	12.4573														138	0.93904	0.93904	1	321	0.666281		339	0.814803	321	1.2843
534.74	0.00053474	0.00053474	0.00053562	1	409	440401										314	0.0909557	0.0909557	1	322	12.4961														279	0.923136	0.923136	1	322	0.668357		300	0.813474	322	1.28831
535.62	0.00053562	0.00053562	0.000536	1	408	439324										315	0.0900028	0.0900028	1	323	12.5349														84	0.90401	0.90401	1	323	0.670432		78	0.810096	323	1.29231
536	0.000536	0.000536	0.00053622	1	407	438247										322	0.0895354	0.0895354	1	324	12.5737														93	0.886386	0.886386	1	324	0.672508		344	0.809756	324	1.29631
536.22	0.00053622	0.00053622	0.00053833	1	406	437170										340	0.0893962	0.0893962	1	325	12.6125														224	0.885512	0.885512	1	325	0.674584		6	0.80581	325	1.30031
538.33	0.00053833	0.00053833	0.00054042	1	405	436093										319	0.0882825	0.0882825	1	326	12.6513														236	0.885109	0.885109	1	326	0.676659		72	0.799284	326	1.30431
540.42	0.00054042	0.00054042	0.00054482	1	404	435017										324	0.0878451	0.0878451	1	327	12.6901														134	0.874297	0.874297	1	327	0.678735		171	0.799069	327	1.30831
544.82	0.00054482	0.00054482	0.00055209	1	403	433940										317	0.0871322	0.0871322	1	328	12.7289														54	0.863987	0.863987	1	328	0.680811		298	0.798069	328	1.31231
552.09	0.00055209	0.00055209	0.00055231	1	402	432863										333	0.086643	0.086643	1	329	12.7677														298	0.835952	0.835952	1	329	0.682886		200	0.792468	329	1.31631
552.31	0.00055231	0.00055231	0.00055257	1	401	431786										320	0.0865318	0.0865318	1	330	12.8066														196	0.8264	0.8264	1	330	0.684962		36	0.790663	330	1.32031
552.57	0.00055257	0.00055257	0.00055271	1	400	430710										318	0.0864206	0.0864206	1	331	12.8454														300	0.755907	0.755907	1	331	0.687038		67	0.790296	331	1.32431
552.71	0.00055271	0.00055271	0.00055659	1	399	429633										386	0.082384	0.082384	1	332	12.8842														60	0.702865	0.702865	1	332	0.689113		151	0.790258	332	1.32831
556.59	0.00055659	0.00055659	0.00055727	1	398	428556										327	0.0808002	0.0808002	1	333	12.923														106	0.682811	0.682811	1	333	0.691189		227	0.784515	333	1.33232
557.27	0.00055727	0.00055727	0.00055766	1	397	427479										328	0.0803072	0.0803072	1	334	12.9618														295	0.58485	0.58485	1	334	0.693265		202	0.779993	334	1.33632
557.66	0.00055766	0.00055766	0.00055857	1	396	426402										325	0.0802363	0.0802363	1	335	13.0006														280	0.569194	0.569194	1	335	0.69534		162	0.775078	335	1.34032
558.57	0.00055857	0.00055857	0.00056229	1	395	425326										326	0.0802363	0.0802363	1	336	13.0394														193	0.518399	0.518399	1	336	0.697416		16	0.76581	336	1.34432
562.29	0.00056229	0.00056229	0.00056255	1	394	424249										338	0.0771928	0.0771928	1	337	13.0782														57	0.512064	0.512064	1	337	0.699491		38	0.760069	337	1.34832
562.55	0.00056255	0.00056255	0.00056373	1	393	423172										332	0.0760772	0.0760772	1	338	13.117														232	0.506499	0.506499	1	338	0.701567		188	0.751309	338	1.35232
563.73	0.00056373	0.00056373	0.00056623	1	392	422095										335	0.0756956	0.0756956	1	339	13.1558														89	0.499384	0.499384	1	339	0.703643		400	0.749611	339	1.35632
566.23	0.00056623	0.00056623	0.00056665	1	391	421019										334	0.0756216	0.0756216	1	340	13.1946														320	0.460254	0.460254	1	340	0.705718		307	0.747109	340	1.36032
566.65	0.00056665	0.00056665	0.00056705	1	390	419942										337	0.0744888	0.0744888	1	341	13.2334														319	0.434981	0.434981	1	341	0.707794		192	0.739419	341	1.36432
567.05	0.00056705	0.00056705	0.00056803	1	389	418865										336	0.0744888	0.0744888	1	342	13.2722														304	0.416163	0.416163	1	342	0.70987		299	0.738679	342	1.36832
568.03	0.00056803	0.00056803	0.00056819	1	388	417788										342	0.0714644	0.0714644	1	343	13.3111														262	0.399255	0.399255	1	343	0.711945		130	0.737209	343	1.37233
568.19	0.00056819	0.00056819	0.00056873	1	387	416712										339	0.071067	0.071067	1	344	13.3499														88	0.360433	0.360433	1	344	0.714021		367	0.730859	344	1.37633
568.73	0.00056873	0.00056873	0.00057066	1	386	415635										344	0.0709017	0.0709017	1	345	13.3887														109	0.354653	0.354653	1	345	0.716097		50	0.725924	345	1.38033
570.66	0.00057066	0.00057066	0.00057249	1	385	414558										341	0.0706661	0.0706661	1	346	13.4275														98	0.335218	0.335218	1	346	0.718172		274	0.723315	346	1.38433
572.49	0.00057249	0.00057249	0.00057568	1	384	413481										343	0.0690891	0.0690891	1	347	13.4663																					306	0.714383	347	1.38833
575.68	0.00057568	0.00057568	0.00057594	1	383	412404										387	0.0690788	0.0690788	1	348	13.5051														min	0.335218						261	0.709221	348	1.39233
575.94	0.00057594	0.00057594	0.00057775	1	382	411328										347	0.0678745	0.0678745	1	349	13.5439														max	17.8886						142	0.701975	349	1.39633
577.75	0.00057775	0.00057775	0.00057923	1	381	410251										356	0.0677633	0.0677633	1	350	13.5827														average	3.63851						179	0.692196	350	1.40033
579.23	0.00057923	0.00057923	0.0005802	1	380	409174										349	0.0675119	0.0675119	1	351	13.6215																					345	0.688816	351	1.40433
580.2	0.0005802	0.0005802	0.00058244	1	379	408097										346	0.0671689	0.0671689	1	352	13.6603																					177	0.688388	352	1.40833
582.44	0.00058244	0.00058244	0.00058386	1	378	407021										345	0.0670869	0.0670869	1	353	13.6991																					277	0.679875	353	1.41233
583.86	0.00058386	0.00058386	0.00058404	1	377	405944										353	0.0656594	0.0656594	1	354	13.7379																					79	0.677568	354	1.41634
584.04	0.00058404	0.00058404	0.00058414	1	376	404867										351	0.0656593	0.0656593	1	355	13.7768																					270	0.67406	355	1.42034
584.14	0.00058414	0.00058414	0.00058416	1	375	403790										371	0.0653277	0.0653277	1	356	13.8156																					81	0.671341	356	1.42434
584.16	0.00058416	0.00058416	0.00058732	1	374	402713										350	0.0646901	0.0646901	1	357	13.8544																					153	0.666461	357	1.42834
587.32	0.00058732	0.00058732	0.00058741	1	373	401637										348	0.064617	0.064617	1	358	13.8932																					131	0.664372	358	1.43234
587.41	0.00058741	0.00058741	0.00058922	1	372	400560										355	0.0646055	0.0646055	1	359	13.932																					100	0.661929	359	1.43634
589.22	0.00058922	0.00058922	0.00059171	1	371	399483										358	0.0645841	0.0645841	1	360	13.9708																					206	0.660111	360	1.44034
591.71	0.00059171	0.00059171	0.00059329	1	370	398406										352	0.0645212	0.0645212	1	361	14.0096																					80	0.658996	361	1.44434
593.29	0.00059329	0.00059329	0.00059418	1	369	397330										354	0.0643034	0.0643034	1	362	14.0484																					329	0.652211	362	1.44834
594.18	0.00059418	0.00059418	0.00059698	1	368	396253										357	0.0616329	0.0616329	1	363	14.0872																					348	0.648378	363	1.45234
596.98	0.00059698	0.00059698	0.00060262	1	367	395176										359	0.0611386	0.0611386	1	364	14.126																					342	0.634601	364	1.45635
602.62	0.00060262	0.00060262	0.00060273	1	366	394099										369	0.060388	0.060388	1	365	14.1648																					29	0.627585	365	1.46035
602.73	0.00060273	0.00060273	0.0006045	1	365	393023										360	0.0599985	0.0599985	1	366	14.2036																					330	0.625344	366	1.46435
604.5	0.0006045	0.0006045	0.00060612	1	364	391946										362	0.0596347	0.0596347	1	367	14.2424																					11	0.624018	367	1.46835
606.12	0.00060612	0.00060612	0.00060694	1	363	390869										363	0.0588647	0.0588647	1	368	14.2813																					328	0.616887	368	1.47235
606.94	0.00060694	0.00060694	0.00060845	1	362	389792										366	0.0587726	0.0587726	1	369	14.3201																					92	0.615644	369	1.47635
608.45	0.00060845	0.00060845	0.00060885	1	361	388715										367	0.0582695	0.0582695	1	370	14.3589																					165	0.605811	370	1.48035
608.85	0.00060885	0.00060885	0.00061156	1	360	387639										373	0.0581723	0.0581723	1	371	14.3977																					17	0.603279	371	1.48435
611.56	0.00061156	0.00061156	0.00061395	1	359	386562										364	0.055632	0.055632	1	372	14.4365																					403	0.599575	372	1.48835
613.95	0.00061395	0.00061395	0.00061649	1	358	385485										365	0.0553827	0.0553827	1	373	14.4753																					55	0.596413	373	1.49235
616.49	0.00061649	0.00061649	0.00062065	1	357	384408										368	0.0543671	0.0543671	1	374	14.5141																					76	0.588082	374	1.49635
620.65	0.00062065	0.00062065	0.00062306	1	356	383332										370	0.0528128	0.0528128	1	375	14.5529																					39	0.582595	375	1.50036
623.06	0.00062306	0.00062306	0.00062449	1	355	382255										372	0.0522507	0.0522507	1	376	14.5917																					389	0.574706	376	1.50436
624.49	0.00062449	0.00062449	0.00062565	1	354	381178										374	0.0518047	0.0518047	1	377	14.6305																					246	0.553532	377	1.50836
625.65	0.00062565	0.00062565	0.00062678	1	353	380101										377	0.0511176	0.0511176	1	378	14.6693																					319	0.549731	378	1.51236
626.78	0.00062678	0.00062678	0.00062992	1	352	379024										384	0.0510775	0.0510775	1	379	14.7081																					95	0.547575	379	1.51636
629.92	0.00062992	0.00062992	0.00063133	1	351	377948										376	0.0495682	0.0495682	1	380	14.7469																					390	0.544488	380	1.52036
631.33	0.00063133	0.00063133	0.00063461	1	350	376871										375	0.0493468	0.0493468	1	381	14.7858																					318	0.536875	381	1.52436
634.61	0.00063461	0.00063461	0.00063487	1	349	375794										382	0.0468813	0.0468813	1	382	14.8246																					5	0.516989	382	1.52836
634.87	0.00063487	0.00063487	0.00063495	1	348	374717										379	0.0463071	0.0463071	1	383	14.8634																					258	0.516423	383	1.53236
634.95	0.00063495	0.00063495	0.00064183	1	347	373641										378	0.0460866	0.0460866	1	384	14.9022																					317	0.506987	384	1.53636
641.83	0.00064183	0.00064183	0.00064297	1	346	372564										381	0.0432511	0.0432511	1	385	14.941																					269	0.506323	385	1.54037
642.97	0.00064297	0.00064297	0.0006494	1	345	371487										380	0.0431173	0.0431173	1	386	14.9798																					247	0.502046	386	1.54437
649.4	0.0006494	0.0006494	0.00065056	1	344	370410										383	0.0421694	0.0421694	1	387	15.0186																					252	0.500651	387	1.54837
650.56	0.00065056	0.00065056	0.00065155	1	343	369333										385	0.041345	0.041345	1	388	15.0574																					341	0.496443	388	1.55237
651.55	0.00065155	0.00065155	0.00065285	1	342	368257										388	0.0380658	0.0380658	1	389	15.0962																					219	0.48698	389	1.55637
652.85	0.00065285	0.00065285	0.00065389	1	341	367180										389	0.0369048	0.0369048	1	390	15.135																					33	0.479899	390	1.56037
653.89	0.00065389	0.00065389	0.00065683	1	340	366103										390	0.0359456	0.0359456	1	391	15.1738																					251	0.478962	391	1.56437
656.83	0.00065683	0.00065683	0.00065838	1	339	365026										393	0.0350824	0.0350824	1	392	15.2126																					279	0.47842	392	1.56837
658.38	0.00065838	0.00065838	0.00065918	1	338	363950										392	0.0343398	0.0343398	1	393	15.2514																					121	0.474157	393	1.57237
659.18	0.00065918	0.00065918	0.00066006	1	337	362873										391	0.0339299	0.0339299	1	394	15.2903																					23	0.472092	394	1.57637
660.06	0.00066006	0.00066006	0.00066042	1	336	361796										397	0.0313491	0.0313491	1	395	15.3291																					215	0.467089	395	1.58037
660.42	0.00066042	0.00066042	0.0006607	1	335	360719										394	0.0308852	0.0308852	1	396	15.3679																					221	0.466948	396	1.58438
660.7	0.0006607	0.0006607	0.00066636	1	334	359643										396	0.0307244	0.0307244	1	397	15.4067																					327	0.465738	397	1.58838
666.36	0.00066636	0.00066636	0.00066672	1	333	358566										395	0.0307244	0.0307244	1	398	15.4455																					411	0.465406	398	1.59238
666.72	0.00066672	0.00066672	0.00066752	1	332	357489										398	0.0301697	0.0301697	1	399	15.4843																					379	0.45915	399	1.59638
667.52	0.00066752	0.00066752	0.00066975	1	331	356412										400	0.0283853	0.0283853	1	400	15.5231																					280	0.458404	400	1.60038
669.75	0.00066975	0.00066975	0.00067272	1	330	355335										403	0.0280249	0.0280249	1	401	15.5619																					249	0.452688	401	1.60438
672.72	0.00067272	0.00067272	0.00067436	1	329	354259										399	0.0272103	0.0272103	1	402	15.6007																					385	0.451739	402	1.60838
674.36	0.00067436	0.00067436	0.00067539	1	328	353182										402	0.0255588	0.0255588	1	403	15.6395																					272	0.443992	403	1.61238
675.39	0.00067539	0.00067539	0.00067615	1	327	352105										401	0.0247648	0.0247648	1	404	15.6783																					196	0.433061	404	1.61638
676.15	0.00067615	0.00067615	0.00067963	1	326	351028										405	0.0240455	0.0240455	1	405	15.7171																					282	0.42581	405	1.62038
679.63	0.00067963	0.00067963	0.00068025	1	325	349952										404	0.0218778	0.0218778	1	406	15.7559																					273	0.420939	406	1.62438
680.25	0.00068025	0.00068025	0.00068369	1	324	348875										406	0.0171679	0.0171679	1	407	15.7948																					113	0.420794	407	1.62839
683.69	0.00068369	0.00068369	0.00068667	1	323	347798																																				150	0.41413	408	1.63239
686.67	0.00068667	0.00068667	0.00068744	1	322	346721																																				281	0.40749	409	1.63639
687.44	0.00068744	0.00068744	0.00068922	1	321	345644										min	0.0171679																									255	0.407099	410	1.64039
689.22	0.00068922	0.00068922	0.00069397	1	320	344568										max	1.43238																									290	0.40156	411	1.64439
693.97	0.00069397	0.00069397	0.00069535	1	319	343491										average	0.301324																									376	0.396849	412	1.64839
695.35	0.00069535	0.00069535	0.00069547	1	318	342414																																				208	0.378842	413	1.65239
695.47	0.00069547	0.00069547	0.00069612	1	317	341337																																				53	0.376412	414	1.65639
696.12	0.00069612	0.00069612	0.00069661	1	316	340261																																				90	0.366457	415	1.66039
696.61	0.00069661	0.00069661	0.00069708	1	315	339184																																				159	0.365659	416	1.66439
697.08	0.00069708	0.00069708	0.00069788	1	314	338107																																				352	0.359505	417	1.6684
697.88	0.00069788	0.00069788	0.00070059	1	313	337030																																				289	0.345305	418	1.6724
700.59	0.00070059	0.00070059	0.00070094	1	312	335953																																				259	0.341333	419	1.6764
700.94	0.00070094	0.00070094	0.00070258	1	311	334877																																				26	0.341129	420	1.6804
702.58	0.00070258	0.00070258	0.00070287	1	310	333800																																				360	0.338298	421	1.6844
702.87	0.00070287	0.00070287	0.0007033	1	309	332723																																				291	0.328276	422	1.6884
703.3	0.0007033	0.0007033	0.00070346	1	308	331646																																				278	0.321599	423	1.6924
703.46	0.00070346	0.00070346	0.00070599	1	307	330570																																				245	0.258236	424	1.6964
705.99	0.00070599	0.00070599	0.00070615	1	306	329493																																				295	0.257989	425	1.7004
706.15	0.00070615	0.00070615	0.00070767	1	305	328416																																				112	0.23505	426	1.7044
707.67	0.00070767	0.00070767	0.00070802	1	304	327339																																				46	0.232891	427	1.7084
708.02	0.00070802	0.00070802	0.00070888	1	303	326263																																				82	0.221235	428	1.71241
708.88	0.00070888	0.00070888	0.00070895	1	302	325186
708.95	0.00070895	0.00070895	0.00070987	1	301	324109																																					0.221235
709.87	0.00070987	0.00070987	0.0007099	1	300	323032																																					8.27121
709.9	0.0007099	0.0007099	0.00071064	1	299	321955																																					1.46831
710.64	0.00071064	0.00071064	0.0007109	1	298	320879
710.9	0.0007109	0.0007109	0.00071157	1	297	319802
711.57	0.00071157	0.00071157	0.00071342	1	296	318725
713.42	0.00071342	0.00071342	0.00071365	1	295	317648
713.65	0.00071365	0.00071365	0.00071526	1	294	316572
715.26	0.00071526	0.00071526	0.00071665	1	293	315495
716.65	0.00071665	0.00071665	0.00071823	1	292	314418
718.23	0.00071823	0.00071823	0.00072845	1	291	313341
728.45	0.00072845	0.00072845	0.00073612	1	290	312264
736.12	0.00073612	0.00073612	0.0007378	1	289	311188
737.8	0.0007378	0.0007378	0.00074027	1	288	310111
740.27	0.00074027	0.00074027	0.00074128	1	287	309034
741.28	0.00074128	0.00074128	0.00074167	1	286	307957
741.67	0.00074167	0.00074167	0.00074247	1	285	306881
742.47	0.00074247	0.00074247	0.00074426	1	284	305804
744.26	0.00074426	0.00074426	0.00074598	1	283	304727
745.98	0.00074598	0.00074598	0.00074882	1	282	303650
748.82	0.00074882	0.00074882	0.0007499	1	281	302573
749.9	0.0007499	0.0007499	0.00075291	1	280	301497
752.91	0.00075291	0.00075291	0.00076112	1	279	300420
761.12	0.00076112	0.00076112	0.00076259	1	278	299343
762.59	0.00076259	0.00076259	0.00076529	1	277	298266
765.29	0.00076529	0.00076529	0.0007669	1	276	297190
766.9	0.0007669	0.0007669	0.0007686	1	275	296113
768.6	0.0007686	0.0007686	0.00077205	1	274	295036
772.05	0.00077205	0.00077205	0.00077349	1	273	293959
773.49	0.00077349	0.00077349	0.0007787	1	272	292883
778.7	0.0007787	0.0007787	0.00077884	1	271	291806
778.84	0.00077884	0.00077884	0.00078659	1	270	290729
786.59	0.00078659	0.00078659	0.00078667	1	269	289652
786.67	0.00078667	0.00078667	0.00078682	1	268	288575
786.82	0.00078682	0.00078682	0.0007871	1	267	287499
787.1	0.0007871	0.0007871	0.0007882	1	266	286422
788.2	0.0007882	0.0007882	0.00079156	1	265	285345
791.56	0.00079156	0.00079156	0.0007925	1	264	284268
792.5	0.0007925	0.0007925	0.00079257	1	263	283192
792.57	0.00079257	0.00079257	0.00079558	1	262	282115
795.58	0.00079558	0.00079558	0.00079643	1	261	281038
796.43	0.00079643	0.00079643	0.00079886	1	260	279961
798.86	0.00079886	0.00079886	0.0007989	1	259	278884
798.9	0.0007989	0.0007989	0.0007998	1	258	277808
799.8	0.0007998	0.0007998	0.00080162	1	257	276731
801.62	0.00080162	0.00080162	0.00080361	1	256	275654
803.61	0.00080361	0.00080361	0.00080447	1	255	274577
804.47	0.00080447	0.00080447	0.00080454	1	254	273501
804.54	0.00080454	0.00080454	0.00080728	1	253	272424
807.28	0.00080728	0.00080728	0.00080973	1	252	271347
809.73	0.00080973	0.00080973	0.00080987	1	251	270270
809.87	0.00080987	0.00080987	0.00081039	1	250	269193
810.39	0.00081039	0.00081039	0.00081065	1	249	268117
810.65	0.00081065	0.00081065	0.00081634	1	248	267040
816.34	0.00081634	0.00081634	0.00081678	1	247	265963
816.78	0.00081678	0.00081678	0.00081686	1	246	264886
816.86	0.00081686	0.00081686	0.0008171	1	245	263810
817.1	0.0008171	0.0008171	0.00082001	1	244	262733
820.01	0.00082001	0.00082001	0.0008207	1	243	261656
820.7	0.0008207	0.0008207	0.00082117	1	242	260579
821.17	0.00082117	0.00082117	0.00082237	1	241	259503
822.37	0.00082237	0.00082237	0.00082478	1	240	258426
824.78	0.00082478	0.00082478	0.00082488	1	239	257349
824.88	0.00082488	0.00082488	0.00082644	1	238	256272
826.44	0.00082644	0.00082644	0.00082763	1	237	255195
827.63	0.00082763	0.00082763	0.0008316	1	236	254119
831.6	0.0008316	0.0008316	0.00083521	1	235	253042
835.21	0.00083521	0.00083521	0.0008366	1	234	251965
836.6	0.0008366	0.0008366	0.00083737	1	233	250888
837.37	0.00083737	0.00083737	0.00083995	1	232	249812
839.95	0.00083995	0.00083995	0.00084048	1	231	248735
840.48	0.00084048	0.00084048	0.00084063	1	230	247658
840.63	0.00084063	0.00084063	0.00084175	1	229	246581
841.75	0.00084175	0.00084175	0.00084262	1	228	245504
842.62	0.00084262	0.00084262	0.00084308	1	227	244428
843.08	0.00084308	0.00084308	0.00086001	1	226	243351
860.01	0.00086001	0.00086001	0.00086058	1	225	242274
860.58	0.00086058	0.00086058	0.00086113	1	224	241197
861.13	0.00086113	0.00086113	0.00086444	1	223	240121
864.44	0.00086444	0.00086444	0.00087089	1	222	239044
870.89	0.00087089	0.00087089	0.00087213	1	221	237967
872.13	0.00087213	0.00087213	0.00087874	1	220	236890
878.74	0.00087874	0.00087874	0.00087994	1	219	235814
879.94	0.00087994	0.00087994	0.00088141	1	218	234737
881.41	0.00088141	0.00088141	0.00088428	1	217	233660
884.28	0.00088428	0.00088428	0.00088491	1	216	232583
884.91	0.00088491	0.00088491	0.00089198	1	215	231506
891.98	0.00089198	0.00089198	0.00089261	1	214	230430
892.61	0.00089261	0.00089261	0.0008985	1	213	229353
898.5	0.0008985	0.0008985	0.00089917	1	212	228276
899.17	0.00089917	0.00089917	0.00090124	1	211	227199
901.24	0.00090124	0.00090124	0.00090428	1	210	226123
904.28	0.00090428	0.00090428	0.00090767	1	209	225046
907.67	0.00090767	0.00090767	0.00090912	1	208	223969
909.12	0.00090912	0.00090912	0.00090939	1	207	222892
909.39	0.00090939	0.00090939	0.00091291	1	206	221815
912.91	0.00091291	0.00091291	0.00091878	1	205	220739
918.78	0.00091878	0.00091878	0.00092489	1	204	219662
924.89	0.00092489	0.00092489	0.00092655	1	203	218585
926.55	0.00092655	0.00092655	0.0009312	1	202	217508
931.2	0.0009312	0.0009312	0.00093128	1	201	216432
931.28	0.00093128	0.00093128	0.00093285	1	200	215355
932.85	0.00093285	0.00093285	0.00093449	1	199	214278
934.49	0.00093449	0.00093449	0.00093874	1	198	213201
938.74	0.00093874	0.00093874	0.00094129	1	197	212124
941.29	0.00094129	0.00094129	0.00094146	1	196	211048
941.46	0.00094146	0.00094146	0.00094416	1	195	209971
944.16	0.00094416	0.00094416	0.00094485	1	194	208894
944.85	0.00094485	0.00094485	0.00095003	1	193	207817
950.03	0.00095003	0.00095003	0.00095263	1	192	206741
952.63	0.00095263	0.00095263	0.00095288	1	191	205664
952.88	0.00095288	0.00095288	0.00095335	1	190	204587
953.35	0.00095335	0.00095335	0.00095903	1	189	203510
959.03	0.00095903	0.00095903	0.00096785	1	188	202434
967.85	0.00096785	0.00096785	0.00096838	1	187	201357
968.38	0.00096838	0.00096838	0.00096939	1	186	200280
969.39	0.00096939	0.00096939	0.00096978	1	185	199203
969.78	0.00096978	0.00096978	0.00097526	1	184	198126
975.26	0.00097526	0.00097526	0.00097725	1	183	197050
977.25	0.00097725	0.00097725	0.0009776	1	182	195973
977.6	0.0009776	0.0009776	0.00097994	1	181	194896
979.94	0.00097994	0.00097994	0.00098761	1	180	193819
987.61	0.00098761	0.00098761	0.0009878	1	179	192743
987.8	0.0009878	0.0009878	0.00098971	1	178	191666
989.71	0.00098971	0.00098971	0.00099065	1	177	190589
990.65	0.00099065	0.00099065	0.00099697	1	176	189512
996.97	0.00099697	0.00099697	0.00099864	1	175	188435
998.64	0.00099864	0.00099864	0.00100442	1	174	187359
1004.42	0.00100442	0.00100442	0.00101015	1	173	186282
1010.15	0.00101015	0.00101015	0.00101109	1	172	185205
1011.09	0.00101109	0.00101109	0.00102198	1	171	184128
1021.98	0.00102198	0.00102198	0.00102275	1	170	183052
1022.75	0.00102275	0.00102275	0.00102414	1	169	181975
1024.14	0.00102414	0.00102414	0.00102698	1	168	180898
1026.98	0.00102698	0.00102698	0.00103134	1	167	179821
1031.34	0.00103134	0.00103134	0.00103201	1	166	178744
1032.01	0.00103201	0.00103201	0.00103214	1	165	177668
1032.14	0.00103214	0.00103214	0.00103339	1	164	176591
1033.39	0.00103339	0.00103339	0.00103621	1	163	175514
1036.21	0.00103621	0.00103621	0.00103977	1	162	174437
1039.77	0.00103977	0.00103977	0.0010435	1	161	173361
1043.5	0.0010435	0.0010435	0.00104558	1	160	172284
1045.58	0.00104558	0.00104558	0.0010515	1	159	171207
1051.5	0.0010515	0.0010515	0.00105334	1	158	170130
1053.34	0.00105334	0.00105334	0.00105337	1	157	169054
1053.37	0.00105337	0.00105337	0.00107424	1	156	167977
1074.24	0.00107424	0.00107424	0.00108359	1	155	166900
1083.59	0.00108359	0.00108359	0.00109182	1	154	165823
1091.82	0.00109182	0.00109182	0.00109629	1	153	164746
1096.29	0.00109629	0.00109629	0.00109774	1	152	163670
1097.74	0.00109774	0.00109774	0.00109936	1	151	162593
1099.36	0.00109936	0.00109936	0.00109954	1	150	161516
1099.54	0.00109954	0.00109954	0.0011014	1	149	160439
1101.4	0.0011014	0.0011014	0.00110148	1	148	159363
1101.48	0.00110148	0.00110148	0.00110192	1	147	158286
1101.92	0.00110192	0.00110192	0.00110444	1	146	157209
1104.44	0.00110444	0.00110444	0.00111386	1	145	156132
1113.86	0.00111386	0.00111386	0.00111573	1	144	155055
1115.73	0.00111573	0.00111573	0.00112643	1	143	153979
1126.43	0.00112643	0.00112643	0.00112728	1	142	152902
1127.28	0.00112728	0.00112728	0.00114005	1	141	151825
1140.05	0.00114005	0.00114005	0.0011491	1	140	150748
1149.1	0.0011491	0.0011491	0.00114957	1	139	149672
1149.57	0.00114957	0.00114957	0.00115186	1	138	148595
1151.86	0.00115186	0.00115186	0.0011553	1	137	147518
1155.3	0.0011553	0.0011553	0.00115658	1	136	146441
1156.58	0.00115658	0.00115658	0.00115669	1	135	145364
1156.69	0.00115669	0.00115669	0.00115968	1	134	144288
1159.68	0.00115968	0.00115968	0.00116044	1	133	143211
1160.44	0.00116044	0.00116044	0.00116104	1	132	142134
1161.04	0.00116104	0.00116104	0.00116552	1	131	141057
1165.52	0.00116552	0.00116552	0.00116906	1	130	139981
1169.06	0.00116906	0.00116906	0.00116983	1	129	138904
1169.83	0.00116983	0.00116983	0.00117359	1	128	137827
1173.59	0.00117359	0.00117359	0.00117422	1	127	136750
1174.22	0.00117422	0.00117422	0.0011754	1	126	135674
1175.4	0.0011754	0.0011754	0.0011757	1	125	134597
1175.7	0.0011757	0.0011757	0.00117661	1	124	133520
1176.61	0.00117661	0.00117661	0.00117826	1	123	132443
1178.26	0.00117826	0.00117826	0.00119051	1	122	131366
1190.51	0.00119051	0.00119051	0.00119714	1	121	130290
1197.14	0.00119714	0.00119714	0.00120553	1	120	129213
1205.53	0.00120553	0.00120553	0.00120554	1	119	128136
1205.54	0.00120554	0.00120554	0.00121666	1	118	127059
1216.66	0.00121666	0.00121666	0.00121783	1	117	125983
1217.83	0.00121783	0.00121783	0.00122197	1	116	124906
1221.97	0.00122197	0.00122197	0.00123508	1	115	123829
1235.08	0.00123508	0.00123508	0.00123612	1	114	122752
1236.12	0.00123612	0.00123612	0.00124381	1	113	121675
1243.81	0.00124381	0.00124381	0.00125896	1	112	120599
1258.96	0.00125896	0.00125896	0.00127511	1	111	119522
1275.11	0.00127511	0.00127511	0.00128265	1	110	118445
1282.65	0.00128265	0.00128265	0.00128542	1	109	117368
1285.42	0.00128542	0.00128542	0.00129854	1	108	116292
1298.54	0.00129854	0.00129854	0.00129991	1	107	115215
1299.91	0.00129991	0.00129991	0.00130249	1	106	114138
1302.49	0.00130249	0.00130249	0.00130807	1	105	113061
1308.07	0.00130807	0.00130807	0.00130856	1	104	111984
1308.56	0.00130856	0.00130856	0.00130997	1	103	110908
1309.97	0.00130997	0.00130997	0.00131763	1	102	109831
1317.63	0.00131763	0.00131763	0.00131778	1	101	108754
1317.78	0.00131778	0.00131778	0.00132289	1	100	107677
1322.89	0.00132289	0.00132289	0.00132378	1	99	106601
1323.78	0.00132378	0.00132378	0.00133289	1	98	105524
1332.89	0.00133289	0.00133289	0.0013382	1	97	104447
1338.2	0.0013382	0.0013382	0.00134627	1	96	103370
1346.27	0.00134627	0.00134627	0.0013516	1	95	102294
1351.6	0.0013516	0.0013516	0.00135239	1	94	101217
1352.39	0.00135239	0.00135239	0.00135251	1	93	100140
1352.51	0.00135251	0.00135251	0.00135874	1	92	99063.2
1358.74	0.00135874	0.00135874	0.00135926	1	91	97986.4
1359.26	0.00135926	0.00135926	0.00136274	1	90	96909.7
1362.74	0.00136274	0.00136274	0.00136363	1	89	95832.9
1363.63	0.00136363	0.00136363	0.0013691	1	88	94756.1
1369.1	0.0013691	0.0013691	0.00138368	1	87	93679.3
1383.68	0.00138368	0.00138368	0.00138576	1	86	92602.6
1385.76	0.00138576	0.00138576	0.00139	1	85	91525.8
1390	0.00139	0.00139	0.00139785	1	84	90449
1397.85	0.00139785	0.00139785	0.00141023	1	83	89372.2
1410.23	0.00141023	0.00141023	0.0014199	1	82	88295.5
1419.9	0.0014199	0.0014199	0.00143243	1	81	87218.7
1432.43	0.00143243	0.00143243	0.00143404	1	80	86141.9
1434.04	0.00143404	0.00143404	0.00144404	1	79	85065.1
1444.04	0.00144404	0.00144404	0.00145975	1	78	83988.4
1459.75	0.00145975	0.00145975	0.00146377	1	77	82911.6
1463.77	0.00146377	0.00146377	0.00147028	1	76	81834.8
1470.28	0.00147028	0.00147028	0.00147144	1	75	80758
1471.44	0.00147144	0.00147144	0.00150058	1	74	79681.3
1500.58	0.00150058	0.00150058	0.00150359	1	73	78604.5
1503.59	0.00150359	0.00150359	0.00150888	1	72	77527.7
1508.88	0.00150888	0.00150888	0.001509	1	71	76451
1509	0.001509	0.001509	0.00151189	1	70	75374.2
1511.89	0.00151189	0.00151189	0.00151684	1	69	74297.4
1516.84	0.00151684	0.00151684	0.00151686	1	68	73220.6
1516.86	0.00151686	0.00151686	0.00152051	1	67	72143.9
1520.51	0.00152051	0.00152051	0.0015232	1	66	71067.1
1523.2	0.0015232	0.0015232	0.00153695	1	65	69990.3
1536.95	0.00153695	0.00153695	0.00154076	1	64	68913.5
1540.76	0.00154076	0.00154076	0.00154967	1	63	67836.8
1549.67	0.00154967	0.00154967	0.00157313	1	62	66760
1573.13	0.00157313	0.00157313	0.00157427	1	61	65683.2
1574.27	0.00157427	0.00157427	0.00158034	1	60	64606.4
1580.34	0.00158034	0.00158034	0.00158437	1	59	63529.7
1584.37	0.00158437	0.00158437	0.00159322	1	58	62452.9
1593.22	0.00159322	0.00159322	0.00159712	1	57	61376.1
1597.12	0.00159712	0.00159712	0.00159911	1	56	60299.3
1599.11	0.00159911	0.00159911	0.00160835	1	55	59222.6
1608.35	0.00160835	0.00160835	0.00162054	1	54	58145.8
1620.54	0.00162054	0.00162054	0.00162327	1	53	57069
1623.27	0.00162327	0.00162327	0.00162869	1	52	55992.2
1628.69	0.00162869	0.00162869	0.00166141	1	51	54915.5
1661.41	0.00166141	0.00166141	0.00168438	1	50	53838.7
1684.38	0.00168438	0.00168438	0.00170074	1	49	52761.9
1700.74	0.00170074	0.00170074	0.00172598	1	48	51685.2
1725.98	0.00172598	0.00172598	0.00173823	1	47	50608.4
1738.23	0.00173823	0.00173823	0.00179001	1	46	49531.6
1790.01	0.00179001	0.00179001	0.00181303	1	45	48454.8
1813.03	0.00181303	0.00181303	0.00181722	1	44	47378.1
1817.22	0.00181722	0.00181722	0.00181903	1	43	46301.3
1819.03	0.00181903	0.00181903	0.00183714	1	42	45224.5
1837.14	0.00183714	0.00183714	0.00184256	1	41	44147.7
1842.56	0.00184256	0.00184256	0.00184697	1	40	43071
1846.97	0.00184697	0.00184697	0.00186758	1	39	41994.2
1867.58	0.00186758	0.00186758	0.00190552	1	38	40917.4
1905.52	0.00190552	0.00190552	0.00191447	1	37	39840.6
1914.47	0.00191447	0.00191447	0.00194039	1	36	38763.9
1940.39	0.00194039	0.00194039	0.00194769	1	35	37687.1
1947.69	0.00194769	0.00194769	0.00195208	1	34	36610.3
1952.08	0.00195208	0.00195208	0.0019634	1	33	35533.5
1963.4	0.0019634	0.0019634	0.00198775	1	32	34456.8
1987.75	0.00198775	0.00198775	0.00201304	1	31	33380
2013.04	0.00201304	0.00201304	0.00205465	1	30	32303.2
2054.65	0.00205465	0.00205465	0.00205592	1	29	31226.4
2055.92	0.00205592	0.00205592	0.00205782	1	28	30149.7
2057.82	0.00205782	0.00205782	0.00209786	1	27	29072.9
2097.86	0.00209786	0.00209786	0.00210988	1	26	27996.1
2109.88	0.00210988	0.00210988	0.00214498	1	25	26919.3
2144.98	0.00214498	0.00214498	0.00215047	1	24	25842.6
2150.47	0.00215047	0.00215047	0.00215434	1	23	24765.8
2154.34	0.00215434	0.00215434	0.00215991	1	22	23689
2159.91	0.00215991	0.00215991	0.00217417	1	21	22612.3
2174.17	0.00217417	0.00217417	0.00219915	1	20	21535.5
2199.15	0.00219915	0.00219915	0.00221978	1	19	20458.7
2219.78	0.00221978	0.00221978	0.00222834	1	18	19381.9
2228.34	0.00222834	0.00222834	0.00223639	1	17	18305.2
2236.39	0.00223639	0.00223639	0.00225795	1	16	17228.4
2257.95	0.00225795	0.00225795	0.00238488	1	15	16151.6
2384.88	0.00238488	0.00238488	0.0024483	1	14	15074.8
2448.3	0.0024483	0.0024483	0.00250062	1	13	13998.1
2500.62	0.00250062	0.00250062	0.00254269	1	12	12921.3
2542.69	0.00254269	0.00254269	0.00266519	1	11	11844.5
2665.19	0.00266519	0.00266519	0.00284008	1	10	10767.7
2840.08	0.00284008	0.00284008	0.00288804	1	9	9690.97
2888.04	0.00288804	0.00288804	0.00290382	1	8	8614.19
2903.82	0.00290382	0.00290382	0.00296306	1	7	7537.42
2963.06	0.00296306	0.00296306	0.00342449	1	6	6460.64
3424.49	0.00342449	0.00342449	0.00359517	1	5	5383.87
3595.17	0.00359517	0.00359517	0.00360401	1	4	4307.1
3604.01	0.00360401	0.00360401	0.003792	1	3	3230.32
3792	0.003792	0.003792	0.00430154	1	2	2153.55
4301.54	0.00430154	0.00430154	0.00530294	1	1	1076.77
5302.94	0.00530294	0.00530294
	average length	0.000768953

## Sheet: Set D - EW lengths
SEM-CL EW Traces						Outcrop 1D scanline EW Fractures								SRF Phone LiDar EW Traces using IXY nodes						SRF Phone LiDar EW Traces using IXYC nodes						Drone EW Traces RC						Drone EW Traces SRF
Area (m^2)						Scanline Length (m)		40.45						Area NNW (m2)	13.6631					Area NNW (m2)	13.6631					Area (m^2)	274.043					Area (m^2)	284.261
						Position	Length	Length duplicates	Length w/o dup	frequency	cum freq	cum freq/area		FID	cum freq	Orientatio	Length	Cum freq		FID	cum freq	Orientatio	Length	Cum freq		FID	Id	WE_Length (m)	cum freq	cum freq/area		FID	Length	duplicates	length w/o duplicates	frequency	cum freq	cum freq/area
Not enough EW fractures in thin section for cum freq analysis. Only 15 EW microfractures recorded in MHWK-3-2B thin section.						17.99	3.33	3.33	3.33	1	1	0.0247219		85	1	ENE	0.722952	0.0731898		85	1	ENE	0.722952	0.0731898		28	0	5.70162	1	0.00364906		160	4.22683	4.22683	4.22683	1	1	0.00351789
						15.7	3.27	3.27	3.27	1	2	0.0494438		112	2	ENE	0.600602	0.14638		112	2	ENE	0.600602	0.14638		213	0	4.57199	2	0.00729811		244	3.60477	3.60477	3.60477	1	2	0.00703578
						32.78	3.07	3.07	3.07	1	3	0.0741656		129	3	ENE	0.588174	0.21957		129	3	ENE	0.588174	0.21957		289	0	4.56251	3	0.0109472		233	3.57335	3.57335	3.57335	1	3	0.0105537
						22.84	2.65	2.65	2.65	1	4	0.0988875		125	4	ENE	0.543578	0.292759		125	4	ENE	0.543578	0.292759		155	0	4.43249	4	0.0145962		194	3.41474	3.41474	3.41474	1	4	0.0140716
						38.82	2.12	2.12	2.12	1	5	0.123609		91	5	ENE	0.534384	0.365949		91	5	ENE	0.534384	0.365949		140	0	4.12006	5	0.0182453		334	2.89083	2.89083	2.89083	1	5	0.0175894
						40.05	1.8	1.8	1.8	1	6	0.148331		16	6	ENE	0.52835	0.439139		16	6	ENE	0.52835	0.439139		154	0	4.10077	6	0.0218943		323	2.88818	2.88818	2.88818	1	6	0.0211073
	# frac	15				19.82	1.68	1.68	1.68	1	7	0.173053		63	7	ENE	0.504612	0.512329		63	7	ENE	0.504612	0.512329		2	0	3.89874	7	0.0255434		161	2.80021	2.80021	2.80021	1	7	0.0246252
	min length (mm)	0.368697				22.09	1.55	1.55	1.55	1	8	0.197775		84	8	ENE	0.47254	0.585519		84	8	ENE	0.47254	0.585519		3	0	3.79693	8	0.0291924		271	2.58638	2.58638	2.58638	1	8	0.0281431
	max length (mm)	2.18782				34.67	1.5	1.5	1.5	1	9	0.222497		53	9	ENE	0.399854	0.658709		53	9	ENE	0.399854	0.658709		204	0	3.6089	9	0.0328415		363	2.4561	2.4561	2.4561	1	9	0.031661
	average length	NA				16.41	1.46	1.46	1.46	1	10	0.247219		71	10	ENE	0.379613	0.731898		71	10	ENE	0.379613	0.731898		150	0	3.59324	10	0.0364906		20	2.29946	2.29946	2.29946	1	10	0.0351789
						10	1.32	1.32	1.32	1	11	0.271941		42	11	ENE	0.348766	0.805088		42	11	ENE	0.348766	0.805088		223	0	3.52284	11	0.0401396		142	2.24686	2.24686	2.24686	1	11	0.0386968
						12.85	1.28	1.28	1.28	1	12	0.296663		67	12	ENE	0.347896	0.878278		67	12	ENE	0.347896	0.878278		21	0	3.26832	12	0.0437887		39	2.17234	2.17234	2.17234	1	12	0.0422147
						21.62	1.27	1.27	1.27	1	13	0.321384		94	13	ENE	0.344509	0.951468		94	13	ENE	0.344509	0.951468		131	0	3.21231	13	0.0474377		33	2.14493	2.14493	2.14493	1	13	0.0457326
						14.82	1.03	1.03	1.03	1	14	0.346106		86	14	ENE	0.312836	1.02466		86	14	ENE	0.312836	1.02466		8	0	2.96113	14	0.0510868		151	2.13447	2.13447	2.13447	1	14	0.0492504
						37.89	1	1	1	1	15	0.370828		17	15	ENE	0.302652	1.09785		17	15	ENE	0.302652	1.09785		290	0	2.92335	15	0.0547358		77	2.12718	2.12718	2.12718	1	15	0.0527683
						17.49	0.95	0.95	0.95	3	18	0.444994		120	16	ENE	0.290975	1.17104		120	16	ENE	0.290975	1.17104		87	0	2.78288	16	0.0583849		275	2.11963	2.11963	2.11963	1	16	0.0562862
						20.66	0.95	Duplicate	0.93	1	19	0.469716		90	17	ENE	0.288732	1.24423		90	17	ENE	0.288732	1.24423		86	0	2.7569	17	0.062034		128	2.08621	2.08621	2.08621	1	17	0.0598041
						22.32	0.95	Duplicate	0.91	2	21	0.519159		124	18	ENE	0.28552	1.31742		124	18	ENE	0.28552	1.31742		6	0	2.61007	18	0.065683		365	2.02631	2.02631	2.02631	1	18	0.063322
						15.97	0.93	0.93	0.9	1	22	0.543881		103	19	ENE	0.282509	1.39061		103	19	ENE	0.282509	1.39061		0	0	2.54484	19	0.0693321		82	2.00771	2.00771	2.00771	1	19	0.0668399
						2.9	0.91	0.91	0.84	1	23	0.568603		101	20	ENE	0.262777	1.4638		101	20	ENE	0.262777	1.4638		291	0	2.485	20	0.0729811		292	1.9897	1.9897	1.9897	1	20	0.0703578
						11.82	0.91	Duplicate	0.81	1	24	0.593325		128	21	ENE	0.262006	1.53699		128	21	ENE	0.262006	1.53699		321	0	2.46331	21	0.0766302		32	1.98644	1.98644	1.98644	1	21	0.0738757
						15.01	0.9	0.9	0.77	1	25	0.618047		50	22	ENE	0.216997	1.61018		79	22	ENE	0.249946	1.61018		142	0	2.32077	22	0.0802792		129	1.90609	1.90609	1.90609	1	22	0.0773935
						35.76	0.84	0.84	0.69	3	28	0.692213		79	23	ENE	0.215071	1.68337		114	23	ENE	0.244568	1.68337		218	0	2.31587	23	0.0839283		217	1.88074	1.88074	1.88074	1	23	0.0809114
						8.38	0.81	0.81	0.67	2	30	0.741656		82	24	ENE	0.183857	1.75656		50	24	ENE	0.216997	1.75656		76	0	2.15656	24	0.0875773		341	1.87517	1.87517	1.87517	1	24	0.0844293
						29.56	0.77	0.77	0.65	1	31	0.766378		83	25	ENE	0.170202	1.82975		82	25	ENE	0.183857	1.82975		29	0	2.12271	25	0.0912264		368	1.86428	1.86428	1.86428	1	25	0.0879472
						10.95	0.69	0.69	0.63	1	32	0.7911		114	26	ENE	0.159429	1.90294		81	26	ENE	0.174932	1.90294		199	0	2.07355	26	0.0948755		46	1.83296	1.83296	1.83296	1	26	0.0914651
						21.37	0.69	Duplicate	0.61	1	33	0.815822		127	27	ENE	0.153465	1.97613		83	27	ENE	0.170202	1.97613		14	0	2.06087	27	0.0985245		150	1.8173	1.8173	1.8173	1	27	0.094983
						28.81	0.69	Duplicate	0.47	1	34	0.840544		41	28	ENE	0.149038	2.04932		127	28	ENE	0.153465	2.04932		264	0	2.03808	28	0.102174		126	1.80874	1.80874	1.80874	1	28	0.0985009
						7.5	0.67	0.67	0.46	1	35	0.865266		92	29	ENE	0.149018	2.12251		41	29	ENE	0.149038	2.12251		13	0	1.98503	29	0.105823		240	1.77188	1.77188	1.77188	1	29	0.102019
						28.4	0.67	Duplicate	0.44	1	36	0.889988		49	30	ENE	0.145163	2.1957		92	30	ENE	0.149018	2.1957		230	0	1.98466	30	0.109472		63	1.70914	1.70914	1.70914	1	30	0.105537
						37.73	0.65	0.65	0.43	1	37	0.91471		116	31	ENE	0.140217	2.26888		49	31	ENE	0.145163	2.26888		75	0	1.98069	31	0.113121		141	1.66835	1.66835	1.66835	1	31	0.109055
						8.62	0.63	0.63	0.42	1	38	0.939431		48	32	ENE	0.133132	2.34207		116	32	ENE	0.140217	2.34207		82	0	1.97845	32	0.11677		81	1.64963	1.64963	1.64963	1	32	0.112572
						37.04	0.61	0.61	0.41	1	39	0.964153		130	33	ENE	0.128311	2.41526		48	33	ENE	0.133132	2.41526		275	0	1.9487	33	0.120419		261	1.63439	1.63439	1.63439	1	33	0.11609
						31.57	0.47	0.47	0.39	1	40	0.988875		98	34	ENE	0.12624	2.48845		130	34	ENE	0.128311	2.48845		137	0	1.93666	34	0.124068		270	1.62797	1.62797	1.62797	1	34	0.119608
						23.52	0.46	0.46	0.36	2	42	1.03832		126	35	ENE	0.119504	2.56164		98	35	ENE	0.12624	2.56164		15	0	1.89296	35	0.127717		241	1.62559	1.62559	1.62559	1	35	0.123126
						40.45	0.44	0.44	0.34	3	45	1.11248		99	36	ENE	0.107402	2.63483		126	36	ENE	0.119504	2.63483		173	0	1.84744	36	0.131366		74	1.61774	1.61774	1.61774	1	36	0.126644
						22.65	0.43	0.43	0.33	2	47	1.16193		119	37	ENE	0.106975	2.70802		99	37	ENE	0.107402	2.70802		217	0	1.83684	37	0.135015		220	1.56642	1.56642	1.56642	1	37	0.130162
						26.54	0.42	0.42	0.32	1	48	1.18665		121	38	ENE	0.104344	2.78121		119	38	ENE	0.106975	2.78121		30	0	1.81699	38	0.138664		188	1.54531	1.54531	1.54531	1	38	0.13368
						24.07	0.41	0.41	0.3	1	49	1.21137		118	39	ENE	0.0993365	2.8544		121	39	ENE	0.104344	2.8544		315	0	1.79432	39	0.142313		304	1.51944	1.51944	1.51944	1	39	0.137198
						2.18	0.39	0.39	0.29	3	52	1.28554		81	40	ENE	0.097085	2.92759		118	40	ENE	0.0993365	2.92759		83	0	1.78831	40	0.145962		186	1.47379	1.47379	1.47379	1	40	0.140716
						6.65	0.36	0.36	0.28	1	53	1.31026		180	41	ENE	0.084945	3.00078		54	41	ENE	0.0798124	3.00078		282	0	1.76507	41	0.149611		384	1.47186	1.47186	1.47186	1	41	0.144233
						30.49	0.36	Duplicate	0.26	2	55	1.3597		117	42	ENE	0.0766499	3.07397		117	42	ENE	0.0766499	3.07397		4	0	1.73729	42	0.15326		130	1.47059	1.47059	1.47059	1	42	0.147751
						14.49	0.34	0.34	0.23	1	56	1.38443		133	43	ENE	0.069804	3.14716		105	43	ENE	0.0676276	3.14716		51	0	1.73449	43	0.156909		272	1.43527	1.43527	1.43527	1	43	0.151269
						25.33	0.34	Duplicate	0.17	1	57	1.40915		105	44	ENE	0.0676276	3.22035		93	44	ENE	0.0609836	3.22035		1	0	1.7263	44	0.160558		140	1.33133	1.33133	1.33133	1	44	0.154787
						27.79	0.34	Duplicate						93	45	ENE	0.0609836	3.29354		108	45	ENE	0.0536238	3.29354		16	0	1.70589	45	0.164208		252	1.31686	1.31686	1.31686	1	45	0.158305
						27.14	0.33	0.33						108	46	ENE	0.0536238	3.36673		109	46	ENE	0.0532445	3.36673		10	0	1.65362	46	0.167857		257	1.27628	1.27628	1.27628	1	46	0.161823
						27.37	0.33	Duplicate						109	47	ENE	0.0532445	3.43992		29	47	ENE	0.0510229	3.43992		175	0	1.62245	47	0.171506		354	1.27521	1.27521	1.27521	1	47	0.165341
						34.02	0.32	0.32						29	48	ENE	0.0510229	3.51311		115	48	ENE	0.0422714	3.51311		202	0	1.5961	48	0.175155		311	1.26884	1.26884	1.26884	1	48	0.168859
						37.56	0.3	0.3						54	49	ENE	0.0436666	3.5863		2	49	ENE	0.0327324	3.5863		144	0	1.57012	49	0.178804		325	1.24515	1.24515	1.24515	1	49	0.172377
						5.96	0.29	0.29						115	50	ENE	0.0422714	3.65949		1	50	ENE	0.0301579	3.65949		159	0	1.5554	50	0.182453		62	1.22583	1.22583	1.22583	1	50	0.175894
						25.75	0.29	Duplicate						166	51	ENE	0.0366857	3.73268								9	0	1.54783	51	0.186102		102	1.21401	1.21401	1.21401	1	51	0.179412
						33.67	0.29	Duplicate						2	52	ENE	0.0327324	3.80587				min	0.0301579			141	0	1.53945	52	0.189751		262	1.20147	1.20147	1.20147	1	52	0.18293
						29.8	0.28	0.28						1	53	ENE	0.0301579	3.87906				max	0.722952			147	0	1.48871	53	0.1934		300	1.19588	1.19588	1.19588	1	53	0.186448
						23.35	0.26	0.26						168	54	ENE	0.0236812	3.95225				average	0.241092			122	0	1.4813	54	0.197049		209	1.16848	1.16848	1.16848	1	54	0.189966
						26.12	0.26	Duplicate																		26	0	1.46553	55	0.200698		103	1.1588	1.1588	1.1588	1	55	0.193484
						17.37	0.23	0.23								min	0.0236812									181	0	1.46325	56	0.204347		189	1.15548	1.15548	1.15548	1	56	0.197002
						27.48	0.17	0.17								max	0.722952									309	0	1.45773	57	0.207996		195	1.12695	1.12695	1.12695	1	57	0.20052
						count	57									average	0.222884									206	0	1.43194	58	0.211645		6	1.11644	1.11644	1.11644	1	58	0.204038
						min	0.17																			91	0	1.42821	59	0.215294		35	1.11083	1.11083	1.11083	1	59	0.207555
						max	3.33																			46	0	1.41179	60	0.218943		273	1.10616	1.10616	1.10616	1	60	0.211073
						average	0.888772																			104	0	1.39464	61	0.222592		331	1.09337	1.09337	1.09337	1	61	0.214591
																										304	0	1.38206	62	0.226241		207	1.0817	1.0817	1.0817	1	62	0.218109
																										316	0	1.37968	63	0.229891		236	1.0682	1.0682	1.0682	1	63	0.221627
																										19	0	1.37074	64	0.23354		259	1.05864	1.05864	1.05864	1	64	0.225145
																										52	0	1.34599	65	0.237189		357	1.05803	1.05803	1.05803	1	65	0.228663
																										85	0	1.34161	66	0.240838		366	1.05598	1.05598	1.05598	1	66	0.232181
																										263	0	1.33018	67	0.244487		306	1.04929	1.04929	1.04929	1	67	0.235699
																										298	0	1.32968	68	0.248136		302	1.04044	1.04044	1.04044	1	68	0.239216
																										313	0	1.32751	69	0.251785		369	1.00849	1.00849	1.00849	1	69	0.242734
																										112	0	1.31859	70	0.255434		324	1.00371	1.00371	1.00371	1	70	0.246252
																										299	0	1.31382	71	0.259083		208	1.00246	1.00246	1.00246	1	71	0.24977
																										207	0	1.30214	72	0.262732		36	0.99792	0.99792	0.99792	1	72	0.253288
																										200	0	1.25208	73	0.266381		44	0.990724	0.990724	0.990724	1	73	0.256806
																										310	0	1.22461	74	0.27003		158	0.983126	0.983126	0.983126	1	74	0.260324
																										34	0	1.2115	75	0.273679		31	0.968828	0.968828	0.968828	1	75	0.263842
																										174	0	1.18511	76	0.277328		163	0.967193	0.967193	0.967193	1	76	0.26736
																										105	0	1.17337	77	0.280977		136	0.955957	0.955957	0.955957	1	77	0.270877
																										189	0	1.16895	78	0.284626		269	0.940789	0.940789	0.940789	1	78	0.274395
																										25	0	1.1656	79	0.288275		332	0.937117	0.937117	0.937117	1	79	0.277913
																										283	0	1.15921	80	0.291924		187	0.934395	0.934395	0.934395	1	80	0.281431
																										182	0	1.1544	81	0.295574		43	0.927101	0.927101	0.927101	1	81	0.284949
																										71	0	1.14115	82	0.299223		41	0.919677	0.919677	0.919677	1	82	0.288467
																										224	0	1.12374	83	0.302872		97	0.908399	0.908399	0.908399	1	83	0.291985
																										300	0	1.12011	84	0.306521		159	0.885127	0.885127	0.885127	1	84	0.295503
																										201	0	1.10825	85	0.31017		71	0.883186	0.883186	0.883186	1	85	0.299021
																										320	0	1.10475	86	0.313819		37	0.881417	0.881417	0.881417	1	86	0.302538
																										294	0	1.07639	87	0.317468		316	0.873344	0.873344	0.873344	1	87	0.306056
																										192	0	1.05062	88	0.321117		93	0.868759	0.868759	0.868759	1	88	0.309574
																										7	0	1.04646	89	0.324766		122	0.853612	0.853612	0.853612	1	89	0.313092
																										292	0	1.04594	90	0.328415		177	0.847693	0.847693	0.847693	1	90	0.31661
																										98	0	1.03724	91	0.332064		170	0.847401	0.847401	0.847401	1	91	0.320128
																										126	0	1.02936	92	0.335713		226	0.841021	0.841021	0.841021	1	92	0.323646
																										115	0	1.0265	93	0.339362		248	0.839688	0.839688	0.839688	1	93	0.327164
																										22	0	1.01252	94	0.343011		185	0.833825	0.833825	0.833825	1	94	0.330682
																										279	0	1.00866	95	0.34666		253	0.831572	0.831572	0.831572	1	95	0.334199
																										250	0	1.00404	96	0.350309		113	0.830777	0.830777	0.830777	1	96	0.337717
																										276	0	1.00257	97	0.353958		101	0.813617	0.813617	0.813617	1	97	0.341235
																										242	0	0.997047	98	0.357607		235	0.812626	0.812626	0.812626	1	98	0.344753
																										132	0	0.982747	99	0.361257		138	0.804645	0.804645	0.804645	1	99	0.348271
																										168	0	0.979189	100	0.364906		267	0.788726	0.788726	0.788726	1	100	0.351789
																										18	0	0.977396	101	0.368555		265	0.779482	0.779482	0.779482	1	101	0.355307
																										227	0	0.964986	102	0.372204		344	0.776768	0.776768	0.776768	1	102	0.358825
																										212	0	0.945154	103	0.375853		291	0.776262	0.776262	0.776262	1	103	0.362343
																										216	0	0.94166	104	0.379502		54	0.774692	0.774692	0.774692	1	104	0.36586
																										88	0	0.924253	105	0.383151		149	0.769428	0.769428	0.769428	1	105	0.369378
																										158	0	0.912243	106	0.3868		336	0.764843	0.764843	0.764843	1	106	0.372896
																										180	0	0.910767	107	0.390449		289	0.753807	0.753807	0.753807	1	107	0.376414
																										97	0	0.908648	108	0.394098		232	0.746569	0.746569	0.746569	1	108	0.379932
																										72	0	0.906332	109	0.397747		153	0.733258	0.733258	0.733258	1	109	0.38345
																										196	0	0.903052	110	0.401396		94	0.733049	0.733049	0.733049	1	110	0.386968
																										27	0	0.902937	111	0.405045		234	0.729605	0.729605	0.729605	1	111	0.390486
																										165	0	0.900883	112	0.408694		345	0.724601	0.724601	0.724601	1	112	0.394004
																										153	0	0.888172	113	0.412343		224	0.720556	0.720556	0.720556	1	113	0.397521
																										234	0	0.887697	114	0.415992		246	0.719852	0.719852	0.719852	1	114	0.401039
																										197	0	0.870138	115	0.419641		228	0.719256	0.719256	0.719256	1	115	0.404557
																										116	0	0.857147	116	0.42329		104	0.714899	0.714899	0.714899	1	116	0.408075
																										133	0	0.854467	117	0.42694		1	0.714646	0.714646	0.714646	1	117	0.411593
																										225	0	0.842495	118	0.430589		297	0.710442	0.710442	0.710442	1	118	0.415111
																										177	0	0.838699	119	0.434238		290	0.708519	0.708519	0.708519	1	119	0.418629
																										281	0	0.827308	120	0.437887		242	0.702748	0.702748	0.702748	1	120	0.422147
																										67	0	0.815624	121	0.441536		237	0.699088	0.699088	0.699088	1	121	0.425665
																										295	0	0.806354	122	0.445185		38	0.684771	0.684771	0.684771	1	122	0.429182
																										266	0	0.80546	123	0.448834		164	0.680442	0.680442	0.680442	1	123	0.4327
																										148	0	0.79331	124	0.452483		298	0.68021	0.68021	0.68021	1	124	0.436218
																										273	0	0.783808	125	0.456132		274	0.677837	0.677837	0.677837	1	125	0.439736
																										231	0	0.763822	126	0.459781		119	0.676413	0.676413	0.676413	1	126	0.443254
																										274	0	0.763007	127	0.46343		131	0.670869	0.670869	0.670869	1	127	0.446772
																										251	0	0.746814	128	0.467079		286	0.669382	0.669382	0.669382	1	128	0.45029
																										12	0	0.739418	129	0.470728		96	0.666569	0.666569	0.666569	1	129	0.453808
																										317	0	0.738116	130	0.474377		310	0.665305	0.665305	0.665305	1	130	0.457326
																										252	0	0.724675	131	0.478026		55	0.655735	0.655735	0.655735	1	131	0.460843
																										186	0	0.715245	132	0.481675		17	0.654864	0.654864	0.654864	1	132	0.464361
																										191	0	0.710662	133	0.485324		2	0.653436	0.653436	0.653436	1	133	0.467879
																										235	0	0.701086	134	0.488973		293	0.653169	0.653169	0.653169	1	134	0.471397
																										37	0	0.695641	135	0.492623		91	0.651391	0.651391	0.651391	1	135	0.474915
																										171	0	0.687904	136	0.496272		22	0.650708	0.650708	0.650708	1	136	0.478433
																										134	0	0.684488	137	0.499921		100	0.648844	0.648844	0.648844	1	137	0.481951
																										211	0	0.681142	138	0.50357		162	0.647363	0.647363	0.647363	1	138	0.485469
																										190	0	0.679007	139	0.507219		260	0.63151	0.63151	0.63151	1	139	0.488987
																										277	0	0.677032	140	0.510868		312	0.62455	0.62455	0.62455	1	140	0.492504
																										139	0	0.676483	141	0.514517		335	0.622566	0.622566	0.622566	1	141	0.496022
																										101	0	0.66744	142	0.518166		276	0.620715	0.620715	0.620715	1	142	0.49954
																										210	0	0.655804	143	0.521815		307	0.618783	0.618783	0.618783	1	143	0.503058
																										57	0	0.652141	144	0.525464		148	0.617581	0.617581	0.617581	1	144	0.506576
																										163	0	0.651082	145	0.529113		95	0.615516	0.615516	0.615516	1	145	0.510094
																										56	0	0.647784	146	0.532762		356	0.610993	0.610993	0.610993	1	146	0.513612
																										262	0	0.643859	147	0.536411		382	0.607205	0.607205	0.607205	1	147	0.51713
																										58	0	0.642831	148	0.54006		230	0.605936	0.605936	0.605936	1	148	0.520647
																										238	0	0.642618	149	0.543709		57	0.605609	0.605609	0.605609	1	149	0.524165
																										49	0	0.639196	150	0.547358		75	0.604524	0.604524	0.604524	1	150	0.527683
																										84	0	0.624001	151	0.551007		339	0.594465	0.594465	0.594465	1	151	0.531201
																										233	0	0.618865	152	0.554657		99	0.590485	0.590485	0.590485	1	152	0.534719
																										143	0	0.616525	153	0.558306		47	0.583022	0.583022	0.583022	1	153	0.538237
																										261	0	0.606423	154	0.561955		154	0.576941	0.576941	0.576941	1	154	0.541755
																										319	0	0.603659	155	0.565604		145	0.571971	0.571971	0.571971	1	155	0.545273
																										270	0	0.599461	156	0.569253		337	0.571441	0.571441	0.571441	1	156	0.548791
																										176	0	0.598168	157	0.572902		296	0.566938	0.566938	0.566938	1	157	0.552308
																										271	0	0.597209	158	0.576551		254	0.565771	0.565771	0.565771	1	158	0.555826
																										106	0	0.585086	159	0.5802		53	0.563325	0.563325	0.563325	1	159	0.559344
																										311	0	0.579436	160	0.583849		9	0.56196	0.56196	0.56196	1	160	0.562862
																										33	0	0.577936	161	0.587498		294	0.560987	0.560987	0.560987	1	161	0.56638
																										136	0	0.576452	162	0.591147		109	0.559384	0.559384	0.559384	1	162	0.569898
																										170	0	0.575316	163	0.594796		50	0.554739	0.554739	0.554739	1	163	0.573416
																										288	0	0.574566	164	0.598445		360	0.553114	0.553114	0.553114	1	164	0.576934
																										23	0	0.572763	165	0.602094		367	0.552532	0.552532	0.552532	1	165	0.580452
																										79	0	0.572459	166	0.605743		287	0.552168	0.552168	0.552168	1	166	0.583969
																										278	0	0.570069	167	0.609392		30	0.551537	0.551537	0.551537	1	167	0.587487
																										256	0	0.568787	168	0.613041		358	0.550622	0.550622	0.550622	1	168	0.591005
																										272	0	0.566111	169	0.61669		78	0.542199	0.542199	0.542199	1	169	0.594523
																										166	0	0.564724	170	0.62034		191	0.537221	0.537221	0.537221	1	170	0.598041
																										99	0	0.564164	171	0.623989		133	0.536148	0.536148	0.536148	1	171	0.601559
																										61	0	0.557646	172	0.627638		152	0.531038	0.531038	0.531038	1	172	0.605077
																										59	0	0.552845	173	0.631287		15	0.531005	0.531005	0.531005	1	173	0.608595
																										236	0	0.547643	174	0.634936		66	0.530623	0.530623	0.530623	1	174	0.612113
																										70	0	0.541369	175	0.638585		255	0.529048	0.529048	0.529048	1	175	0.61563
																										164	0	0.532319	176	0.642234		277	0.523423	0.523423	0.523423	1	176	0.619148
																										11	0	0.524665	177	0.645883		231	0.514827	0.514827	0.514827	1	177	0.622666
																										151	0	0.518064	178	0.649532		134	0.513805	0.513805	0.513805	1	178	0.626184
																										228	0	0.517308	179	0.653181		85	0.510064	0.510064	0.510064	1	179	0.629702
																										89	0	0.515419	180	0.65683		206	0.508629	0.508629	0.508629	1	180	0.63322
																										124	0	0.515327	181	0.660479		251	0.507511	0.507511	0.507511	1	181	0.636738
																										193	0	0.513567	182	0.664128		48	0.507357	0.507357	0.507357	1	182	0.640256
																										149	0	0.512892	183	0.667777		143	0.503098	0.503098	0.503098	1	183	0.643774
																										269	0	0.512722	184	0.671426		264	0.501633	0.501633	0.501633	1	184	0.647291
																										138	0	0.511486	185	0.675075		215	0.501014	0.501014	0.501014	1	185	0.650809
																										301	0	0.510898	186	0.678724		125	0.498218	0.498218	0.498218	1	186	0.654327
																										55	0	0.506587	187	0.682373		342	0.497604	0.497604	0.497604	1	187	0.657845
																										244	0	0.500217	188	0.686023		127	0.497057	0.497057	0.497057	1	188	0.661363
																										314	0	0.496042	189	0.689672		346	0.497023	0.497023	0.497023	1	189	0.664881
																										145	0	0.494586	190	0.693321		168	0.496149	0.496149	0.496149	1	190	0.668399
																										5	0	0.492318	191	0.69697		268	0.495584	0.495584	0.495584	1	191	0.671917
																										280	0	0.489873	192	0.700619		214	0.492629	0.492629	0.492629	1	192	0.675435
																										184	0	0.487023	193	0.704268		21	0.479636	0.479636	0.479636	1	193	0.678952
																										167	0	0.486632	194	0.707917		34	0.478671	0.478671	0.478671	1	194	0.68247
																										237	0	0.483322	195	0.711566		52	0.478432	0.478432	0.478432	1	195	0.685988
																										156	0	0.481826	196	0.715215		19	0.474363	0.474363	0.474363	1	196	0.689506
																										208	0	0.474698	197	0.718864		295	0.474203	0.474203	0.474203	1	197	0.693024
																										240	0	0.464718	198	0.722513		284	0.468427	0.468427	0.468427	1	198	0.696542
																										96	0	0.463332	199	0.726162		166	0.466751	0.466751	0.466751	1	199	0.70006
																										63	0	0.461225	200	0.729811		285	0.466126	0.466126	0.466126	1	200	0.703578
																										247	0	0.459662	201	0.73346		245	0.465616	0.465616	0.465616	1	201	0.707096
																										286	0	0.455906	202	0.737109		89	0.460197	0.460197	0.460197	1	202	0.710613
																										60	0	0.442676	203	0.740758		338	0.457461	0.457461	0.457461	1	203	0.714131
																										74	0	0.439808	204	0.744407		210	0.456675	0.456675	0.456675	1	204	0.717649
																										203	0	0.438727	205	0.748056		86	0.451369	0.451369	0.451369	1	205	0.721167
																										36	0	0.43502	206	0.751706		250	0.451135	0.451135	0.451135	1	206	0.724685
																										152	0	0.430116	207	0.755355		278	0.445005	0.445005	0.445005	1	207	0.728203
																										111	0	0.430055	208	0.759004		247	0.443873	0.443873	0.443873	1	208	0.731721
																										194	0	0.428377	209	0.762653		112	0.442498	0.442498	0.442498	1	209	0.735239
																										110	0	0.427281	210	0.766302		370	0.437416	0.437416	0.437416	1	210	0.738757
																										253	0	0.426241	211	0.769951		320	0.434412	0.434412	0.434412	1	211	0.742274
																										222	0	0.419187	212	0.7736		5	0.434045	0.434045	0.434045	1	212	0.745792
																										305	0	0.417709	213	0.777249		72	0.433819	0.433819	0.433819	1	213	0.74931
																										318	0	0.417541	214	0.780898		139	0.433676	0.433676	0.433676	1	214	0.752828
																										259	0	0.413033	215	0.784547		8	0.431328	0.431328	0.431328	1	215	0.756346
																										162	0	0.4129	216	0.788196		106	0.431233	0.431233	0.431233	1	216	0.759864
																										125	0	0.411096	217	0.791845		42	0.429819	0.429819	0.429819	1	217	0.763382
																										209	0	0.410114	218	0.795494		73	0.428559	0.428559	0.428559	1	218	0.7669
																										232	0	0.408657	219	0.799143		309	0.427484	0.427484	0.427484	1	219	0.770418
																										103	0	0.403269	220	0.802792		23	0.421817	0.421817	0.421817	1	220	0.773935
																										312	0	0.400693	221	0.806441		167	0.421331	0.421331	0.421331	1	221	0.777453
																										306	0	0.400193	222	0.81009		108	0.418871	0.418871	0.418871	1	222	0.780971
																										117	0	0.395549	223	0.813739		193	0.418166	0.418166	0.418166	1	223	0.784489
																										307	0	0.395518	224	0.817389		359	0.417758	0.417758	0.417758	1	224	0.788007
																										187	0	0.392532	225	0.821038		182	0.416583	0.416583	0.416583	1	225	0.791525
																										183	0	0.392363	226	0.824687		144	0.413202	0.413202	0.413202	1	226	0.795043
																										41	0	0.392188	227	0.828336		330	0.406038	0.406038	0.406038	1	227	0.798561
																										108	0	0.39051	228	0.831985		180	0.403219	0.403219	0.403219	1	228	0.802079
																										267	0	0.388106	229	0.835634		69	0.402253	0.402253	0.402253	1	229	0.805596
																										90	0	0.37536	230	0.839283		353	0.398157	0.398157	0.398157	1	230	0.809114
																										157	0	0.37223	231	0.842932		40	0.391438	0.391438	0.391438	1	231	0.812632
																										195	0	0.371118	232	0.846581		51	0.391178	0.391178	0.391178	1	232	0.81615
																										241	0	0.37073	233	0.85023		301	0.39077	0.39077	0.39077	1	233	0.819668
																										302	0	0.370351	234	0.853879		385	0.390203	0.390203	0.390203	1	234	0.823186
																										47	0	0.369911	235	0.857528		18	0.389831	0.389831	0.389831	1	235	0.826704
																										24	0	0.36386	236	0.861177		315	0.388031	0.388031	0.388031	1	236	0.830222
																										179	0	0.361853	237	0.864826		229	0.386286	0.386286	0.386286	1	237	0.83374
																										102	0	0.353565	238	0.868475		14	0.386173	0.386173	0.386173	1	238	0.837257
																										68	0	0.353328	239	0.872124		308	0.385255	0.385255	0.385255	1	239	0.840775
																										129	0	0.352452	240	0.875773		181	0.3846	0.3846	0.3846	1	240	0.844293
																										114	0	0.352201	241	0.879422		157	0.379715	0.379715	0.379715	1	241	0.847811
																										265	0	0.35194	242	0.883072		361	0.376639	0.376639	0.376639	1	242	0.851329
																										121	0	0.348869	243	0.886721		200	0.374366	0.374366	0.374366	1	243	0.854847
																										50	0	0.346923	244	0.89037		111	0.371498	0.371498	0.371498	1	244	0.858365
																										268	0	0.345245	245	0.894019		378	0.363846	0.363846	0.363846	1	245	0.861883
																										198	0	0.344828	246	0.897668		169	0.363035	0.363035	0.363035	1	246	0.865401
																										62	0	0.344453	247	0.901317		4	0.361498	0.361498	0.361498	1	247	0.868918
																										255	0	0.343426	248	0.904966		178	0.360101	0.360101	0.360101	1	248	0.872436
																										215	0	0.343288	249	0.908615		121	0.35929	0.35929	0.35929	1	249	0.875954
																										78	0	0.341658	250	0.912264		45	0.356117	0.356117	0.356117	1	250	0.879472
																										118	0	0.341062	251	0.915913		56	0.35578	0.35578	0.35578	1	251	0.88299
																										95	0	0.33261	252	0.919562		135	0.352645	0.352645	0.352645	1	252	0.886508
																										245	0	0.323703	253	0.923211		283	0.352514	0.352514	0.352514	1	253	0.890026
																										123	0	0.323	254	0.92686		25	0.348116	0.348116	0.348116	1	254	0.893544
																										188	0	0.32265	255	0.930509		201	0.345338	0.345338	0.345338	1	255	0.897062
																										248	0	0.319661	256	0.934158		282	0.344265	0.344265	0.344265	1	256	0.900579
																										77	0	0.317314	257	0.937807		79	0.343781	0.343781	0.343781	1	257	0.904097
																										219	0	0.317301	258	0.941456		379	0.343667	0.343667	0.343667	1	258	0.907615
																										69	0	0.315719	259	0.945105		28	0.343149	0.343149	0.343149	1	259	0.911133
																										38	0	0.313352	260	0.948755		280	0.342117	0.342117	0.342117	1	260	0.914651
																										220	0	0.308269	261	0.952404		199	0.342036	0.342036	0.342036	1	261	0.918169
																										161	0	0.307939	262	0.956053		123	0.33969	0.33969	0.33969	1	262	0.921687
																										172	0	0.305212	263	0.959702		219	0.33933	0.33933	0.33933	1	263	0.925205
																										81	0	0.305042	264	0.963351		374	0.338208	0.338208	0.338208	1	264	0.928723
																										214	0	0.302981	265	0.967		173	0.337021	0.337021	0.337021	1	265	0.93224
																										254	0	0.300663	266	0.970649		65	0.335771	0.335771	0.335771	1	266	0.935758
																										221	0	0.299896	267	0.974298		263	0.33444	0.33444	0.33444	1	267	0.939276
																										73	0	0.298986	268	0.977947		174	0.333462	0.333462	0.333462	1	268	0.942794
																										53	0	0.298368	269	0.981596		183	0.332047	0.332047	0.332047	1	269	0.946312
																										32	0	0.297708	270	0.985245		281	0.331873	0.331873	0.331873	1	270	0.94983
																										44	0	0.294697	271	0.988894		179	0.331187	0.331187	0.331187	1	271	0.953348
																										43	0	0.288693	272	0.992543		266	0.330874	0.330874	0.330874	1	272	0.956866
																										249	0	0.285736	273	0.996192		318	0.330019	0.330019	0.330019	1	273	0.960384
																										135	0	0.275682	274	0.999841		243	0.3288	0.3288	0.3288	1	274	0.963901
																										130	0	0.272651	275	1.00349		279	0.327954	0.327954	0.327954	1	275	0.967419
																										31	0	0.271472	276	1.00714		92	0.325162	0.325162	0.325162	1	276	0.970937
																										308	0	0.271106	277	1.01079		349	0.323258	0.323258	0.323258	1	277	0.974455
																										257	0	0.269912	278	1.01444		59	0.321317	0.321317	0.321317	1	278	0.977973
																										93	0	0.269543	279	1.01809		326	0.320166	0.320166	0.320166	1	279	0.981491
																										160	0	0.269302	280	1.02174		333	0.319918	0.319918	0.319918	1	280	0.985009
																										107	0	0.264149	281	1.02538		175	0.31971	0.31971	0.31971	1	281	0.988527
																										303	0	0.259688	282	1.02903		61	0.318245	0.318245	0.318245	1	282	0.992045
																										120	0	0.254727	283	1.03268		98	0.317268	0.317268	0.317268	1	283	0.995562
																										64	0	0.249316	284	1.03633		184	0.315605	0.315605	0.315605	1	284	0.99908
																										40	0	0.242206	285	1.03998		27	0.314679	0.314679	0.314679	1	285	1.0026
																										205	0	0.240922	286	1.04363		190	0.310723	0.310723	0.310723	1	286	1.00612
																										284	0	0.236253	287	1.04728		313	0.310463	0.310463	0.310463	1	287	1.00963
																										260	0	0.234719	288	1.05093		218	0.309046	0.309046	0.309046	1	288	1.01315
																										80	0	0.22573	289	1.05458		26	0.305402	0.305402	0.305402	1	289	1.01667
																										287	0	0.225122	290	1.05823		165	0.302337	0.302337	0.302337	1	290	1.02019
																										65	0	0.222321	291	1.06188		202	0.302131	0.302131	0.302131	1	291	1.02371
																										92	0	0.221662	292	1.06552		107	0.298864	0.298864	0.298864	1	292	1.02722
																										178	0	0.21983	293	1.06917		204	0.2949	0.2949	0.2949	1	293	1.03074
																										113	0	0.213902	294	1.07282		362	0.294886	0.294886	0.294886	1	294	1.03426
																										169	0	0.209079	295	1.07647		49	0.294208	0.294208	0.294208	1	295	1.03778
																										45	0	0.207704	296	1.08012		328	0.293781	0.293781	0.293781	1	296	1.04129
																										17	0	0.202589	297	1.08377		329	0.293418	0.293418	0.293418	1	297	1.04481
																										35	0	0.202263	298	1.08742		355	0.290114	0.290114	0.290114	1	298	1.04833
																										293	0	0.199934	299	1.09107		68	0.286139	0.286139	0.286139	1	299	1.05185
																										258	0	0.199454	300	1.09472		373	0.285769	0.285769	0.285769	1	300	1.05537
																										243	0	0.19853	301	1.09837		239	0.285233	0.285233	0.285233	1	301	1.05888
																										226	0	0.195711	302	1.10201		327	0.283762	0.283762	0.283762	1	302	1.0624
																										128	0	0.193184	303	1.10566		116	0.280086	0.280086	0.280086	1	303	1.06592
																										54	0	0.189376	304	1.10931		124	0.279976	0.279976	0.279976	1	304	1.06944
																										239	0	0.188769	305	1.11296		322	0.279585	0.279585	0.279585	1	305	1.07296
																										48	0	0.184088	306	1.11661		132	0.278444	0.278444	0.278444	1	306	1.07647
																										185	0	0.182023	307	1.12026		105	0.275084	0.275084	0.275084	1	307	1.07999
																										127	0	0.17944	308	1.12391		115	0.274453	0.274453	0.274453	1	308	1.08351
																										297	0	0.177099	309	1.12756		381	0.272043	0.272043	0.272043	1	309	1.08703
																										146	0	0.171829	310	1.13121		225	0.270725	0.270725	0.270725	1	310	1.09055
																										296	0	0.170397	311	1.13486		321	0.270478	0.270478	0.270478	1	311	1.09406
																										42	0	0.169606	312	1.13851		216	0.270186	0.270186	0.270186	1	312	1.09758
																										39	0	0.168201	313	1.14215		288	0.270089	0.270089	0.270089	1	313	1.1011
																										66	0	0.165583	314	1.1458		371	0.269516	0.269516	0.269516	1	314	1.10462
																										20	0	0.160716	315	1.14945		343	0.268844	0.268844	0.268844	1	315	1.10813
																										229	0	0.158473	316	1.1531		212	0.266657	0.266657	0.266657	1	316	1.11165
																										119	0	0.157585	317	1.15675		377	0.264977	0.264977	0.264977	1	317	1.11517
																										285	0	0.143861	318	1.1604		0	0.263276	0.263276	0.263276	1	318	1.11869
																										246	0	0.129977	319	1.16405		198	0.26197	0.26197	0.26197	1	319	1.12221
																										100	0	0.117561	320	1.1677		205	0.261814	0.261814	0.261814	1	320	1.12572
																										109	0	0.102579	321	1.17135		120	0.260967	0.260967	0.260967	1	321	1.12924
																										94	0	0.0695374	322	1.175		364	0.259024	0.259024	0.259024	1	322	1.13276
																																176	0.258352	0.258352	0.258352	1	323	1.13628
																											min	0.0695374				221	0.257232	0.257232	0.257232	1	324	1.1398
																											max	5.70162				70	0.25593	0.25593	0.25593	1	325	1.14331
																											average	0.9092				227	0.255511	0.255511	0.255511	1	326	1.14683
																																197	0.252939	0.252939	0.252939	1	327	1.15035
																																11	0.252767	0.252767	0.252767	1	328	1.15387
																																256	0.251529	0.251529	0.251529	1	329	1.15739
																																76	0.251497	0.251497	0.251497	1	330	1.1609
																																64	0.247605	0.247605	0.247605	1	331	1.16442
																																171	0.24681	0.24681	0.24681	1	332	1.16794
																																211	0.245624	0.245624	0.245624	1	333	1.17146
																																118	0.238899	0.238899	0.238899	1	334	1.17497
																																340	0.237524	0.237524	0.237524	1	335	1.17849
																																88	0.236357	0.236357	0.236357	1	336	1.18201
																																305	0.231745	0.231745	0.231745	1	337	1.18553
																																372	0.227696	0.227696	0.227696	1	338	1.18905
																																3	0.227397	0.227397	0.227397	1	339	1.19256
																																114	0.227218	0.227218	0.227218	1	340	1.19608
																																383	0.221939	0.221939	0.221939	1	341	1.1996
																																83	0.219721	0.219721	0.219721	1	342	1.20312
																																60	0.219174	0.219174	0.219174	1	343	1.20664
																																67	0.214471	0.214471	0.214471	1	344	1.21015
																																317	0.213683	0.213683	0.213683	1	345	1.21367
																																299	0.213672	0.213672	0.213672	1	346	1.21719
																																156	0.209334	0.209334	0.209334	1	347	1.22071
																																110	0.208951	0.208951	0.208951	1	348	1.22423
																																348	0.207239	0.207239	0.207239	1	349	1.22774
																																376	0.206453	0.206453	0.206453	1	350	1.23126
																																249	0.206229	0.206229	0.206229	1	351	1.23478
																																13	0.202462	0.202462	0.202462	1	352	1.2383
																																203	0.200034	0.200034	0.200034	1	353	1.24181
																																192	0.19974	0.19974	0.19974	1	354	1.24533
																																238	0.199025	0.199025	0.199025	1	355	1.24885
																																117	0.196549	0.196549	0.196549	1	356	1.25237
																																351	0.194826	0.194826	0.194826	1	357	1.25589
																																10	0.193307	0.193307	0.193307	1	358	1.2594
																																12	0.192075	0.192075	0.192075	1	359	1.26292
																																7	0.190565	0.190565	0.190565	1	360	1.26644
																																80	0.185473	0.185473	0.185473	1	361	1.26996
																																375	0.182911	0.182911	0.182911	1	362	1.27348
																																258	0.182894	0.182894	0.182894	1	363	1.27699
																																24	0.180583	0.180583	0.180583	1	364	1.28051
																																58	0.179327	0.179327	0.179327	1	365	1.28403
																																29	0.176736	0.176736	0.176736	1	366	1.28755
																																84	0.17292	0.17292	0.17292	1	367	1.29107
																																147	0.171835	0.171835	0.171835	1	368	1.29458
																																146	0.170447	0.170447	0.170447	1	369	1.2981
																																90	0.167984	0.167984	0.167984	1	370	1.30162
																																303	0.164198	0.164198	0.164198	1	371	1.30514
																																196	0.163743	0.163743	0.163743	1	372	1.30865
																																87	0.163518	0.163518	0.163518	1	373	1.31217
																																223	0.16254	0.16254	0.16254	1	374	1.31569
																																222	0.158455	0.158455	0.158455	1	375	1.31921
																																347	0.15544	0.15544	0.15544	1	376	1.32273
																																319	0.150422	0.150422	0.150422	1	377	1.32624
																																213	0.139366	0.139366	0.139366	1	378	1.32976
																																314	0.138999	0.138999	0.138999	1	379	1.33328
																																172	0.133354	0.133354	0.133354	2	381	1.34032
																																380	0.133354	Duplicate	0.125038	1	382	1.34383
																																155	0.125038	0.125038	0.118359	1	383	1.34735
																																16	0.118359	0.118359	0.112876	1	384	1.35087
																																350	0.112876	0.112876	0.109948	1	385	1.35439
																																352	0.109948	0.109948	0.0868785	1	386	1.3579
																																137	0.0868785	0.0868785
