# Supplementary material for: Diagenesis is key to unlocking outcrop fracture data suitable for quantitative extrapolation to geothermal targets
Source: Frontiers journal article supplement (doi:10.3389/feart.2025.1545052), 2025-04-02
Supplement: Table_6.xlsx [file Table_6.xlsx]

## Sheet: Set A Fractures - NNW
Rt 16 Microscanline	Microfracture	Aperture (mm)	Aperture sorted	frequency	Aperture duplicates	no duplicates	no empty cells	Frequency	Cumulative Frequency	Cum Freq/Length		Rt 16 Microscanline	Microfracture	Aperture (mm)	Aperture sorted	frequency	Aperture duplicates	no duplicates	no empty cells	Frequency	Cumulative Frequency	cum freq/length	BR Microscanline	Microfracture	Aperture (mm)	Aperture sorted	frequency	Aperture duplicates	no duplicates	no empty cells	Frequency	Cumulative Frequency	cum freq/length		RR Microscanline	Microfracture	Aperture (mm)	Aperture sorted	frequency	Aperture duplicates	no duplicates	no empty cells	Frequency	Cumulative Frequency	cum freq/length		CBL Macroscanline	Fracture	Aperture (mm)
R16-3-2C-1	1	0.000571	0.405457	1	0.204368	0.204368	0.405457	1	1	0.0237248		R16-3-2B	1	0.00291786	0.13	1	0.13	0.13	0.13	1	1	0.0242777	BR-21-3	1	0.00588878	0.0109418	1			0.0109418	1	1	0.0497265		RR-4	1	0.000564315	0.00163681	1			0.00163681	1	1	0.0291545		CBL-1	1	0.75
42.15 mm	2	0.009076	0.204368	1	0.026491	0.026491	0.204368	1	2	0.0474496		41.19 mm	2	0.00980964	0.121498	1	0.121498	0.121498	0.121498	1	2	0.0485555	20.11 mm	2	0.0109418	0.00963178	1			0.00963178	1	2	0.099453		34.30 mm	2	0.00121193	0.00141141	1			0.00141141	1	2	0.058309		5.6 m	2	0.62
	3	0.001232	0.026491	1	0.021091	0.021091	0.026491	1	3	0.0711744			3	0.00350044	0.0345001	1	0.0345001	0.0345001	0.0345001	1	3	0.0728332		3	0.00473363	0.00588878	1			0.00588878	1	3	0.14918			3	0.000649951	0.00129966	1			0.00129966	1	3	0.0874636			3	0.62
Thin Section Scale	4	0.000899	0.021091	1	0.020587	0.020587	0.021091	1	4	0.0948992		Thin Section Scale	4	0.000741204	0.0329587	1	0.0329587	0.0329587	0.0329587	1	4	0.0971109		4	0.000947586	0.00568362	1			0.00568362	1	4	0.198906			4	0.00163681	0.0012828	1			0.0012828	1	4	0.116618			4	0.4
Macrofractures	5	0.001008	0.020587	1	0.020489	0.020489	0.020587	1	5	0.118624		Macrofractures	5	0.00103115	0.0328333	1	0.0328333	0.0328333	0.0328333	1	5	0.121389		5	0.00568362	0.00473363	1			0.00473363	1	5	0.248633			5	0.000874636	0.00127811	1			0.00127811	1	5	0.145773			5	0.4
	6	0.001232	0.020489	1	0.020002	0.020002	0.020489	1	6	0.142349			6	0.00117195	0.0247259	1	0.0247259	0.0247259	0.0247259	1	6	0.145666		6	0.000585745	0.00450302	1			0.00450302	1	6	0.298359			6	0.00129966	0.00122449	1			0.00122449	1	6	0.174927			6	0.4
	7	0.000672	0.020002	1	0.014676	0.014676	0.020002	1	7	0.166074			7	0.00116799	0.0206856	1	0.0206856	0.0206856	0.0206856	1	7	0.169944		7	0.000739821	0.00327157	1			0.00327157	1	7	0.348086			7	0.00115846	0.00121193	1			0.00121193	1	7	0.204082			7	0.4
	8	0.001451	0.014676	1	0.009682	0.009682	0.014676	1	8	0.189798			8	0.0008	0.0200007	1	0.0200007	0.0200007	0.0200007	1	8	0.194222		8	0.00115833	0.00149659	1			0.00149659	1	8	0.397812			8	0.00109901	0.00115846	1			0.00115846	1	8	0.233236			8	0.4
	9	0.001253	0.009682	1	0.009548	0.009548	0.009682	1	9	0.213523			9	0.000527778	0.0163444	1	0.0163444	0.0163444	0.0163444	1	9	0.2185		9	0.000542236	0.00145691	1			0.00145691	1	9	0.447539			9	0.000832493	0.00114843	1			0.00114843	1	9	0.262391			9	0.33
	10	0.004041	0.009548	1	0.009334	0.009334	0.009548	1	10	0.237248			10	0.00160295	0.01524	1	0.01524	0.01524	0.01524	1	10	0.242777		10	0.00145691	0.00141718	1			0.00141718	1	10	0.497265			10	0.000714286	0.00109901	1			0.00109901	1	10	0.291545			10	0.33
	11	0.006723	0.009334	1	0.009076	0.009076	0.009334	1	11	0.260973			11	0.00071958	0.0121342	1	0.0121342	0.0121342	0.0121342	1	11	0.267055		11	0.000740741	0.00123752	1			0.00123752	1	11	0.546992			11	0.00122449	0.00106122	1			0.00106122	1	11	0.3207			11	0.33
	12	0.001084	0.009076	1	0.00851	0.00851	0.009076	1	12	0.284698			12	0.000944853	0.0119335	1	0.0119335	0.0119335	0.0119335	1	12	0.291333		12	0.00117529	0.00117529	1			0.00117529	1	12	0.596718			12	0.0012828	0.000993749	1			0.000993749	1	12	0.349854			12	0.33
	13	0.006392	0.00851	1	0.008406	0.008406	0.00851	1	13	0.308422			13	0.000501733	0.00980964	1	0.00980964	0.00980964	0.00980964	1	13	0.315611		13	0.00963178	0.00115833	1			0.00115833	1	13	0.646445			13	0.00106122	0.000981397	1			0.000981397	1	13	0.379009			13	0.33
	14	0.002199	0.008406	1	0.008353	0.008353	0.008406	1	14	0.332147			14	0.001	0.00894155	1	0.00894155	0.00894155	0.00894155	1	14	0.339888		14	0.00327157	0.00115439	1			0.00115439	1	14	0.696171			14	0.00127811	0.000919432	1			0.000919432	1	14	0.408163			14	0.33
	15	0.000679	0.008353	1	0.007229	0.007229	0.008353	1	15	0.355872			15	0.00138095	0.0085	1	0.0085	0.0085	0.0085	1	15	0.364166		15	0.000614348	0.00110195	1			0.00110195	1	15	0.745898			15	0.000568087	0.000884354	1			0.000884354	1	15	0.437318			15	0.33
	16	0.008406	0.007229	1	0.006723	0.006723	0.007229	1	16	0.379597			16	0.00119477	0.00820103	1	0.00820103	0.00820103	0.00820103	1	16	0.388444		16	0.000677466	0.00102028	1			0.00102028	1	16	0.795624			16	0.000981397	0.000877931	1			0.000877931	1	16	0.466472			16	0.33
	17	0.001856	0.006723	1	0.006392	0.006392	0.006723	1	17	0.403321			17	0.000609887	0.0078322	1	0.0078322	0.0078322	0.0078322	1	17	0.412722		17	0.00141718	0.000996758	1			0.000996758	1	17	0.845351			17	0.000631639	0.000874636	1			0.000874636	1	17	0.495627			17	0.265
	18	0.001008	0.006392	1	0.006356	0.006356	0.006392	1	18	0.427046			18	0.000811035	0.00658333	1	0.00658333	0.00658333	0.00658333	1	18	0.436999		18	0.000534822	0.000947586	1			0.000947586	1	18	0.895077			18	0.000792893	0.000832493	1			0.000832493	1	18	0.524781			18	0.265
	19	0.008353	0.006356	1	0.005547	0.005547	0.006356	1	19	0.450771			19	0.000715871	0.00613858	1	0.00613858	0.00613858	0.00613858	1	19	0.461277		19	0.000996758	0.000942389	1			0.000942389	1	19	0.944804			19	0.000671069	0.000820398	1			0.000820398	1	19	0.553936			19	0.265
	20	0.000951	0.005547	1	0.005305	0.005305	0.005547	1	20	0.474496			20	0.00224012	0.00550568	1	0.00550568	0.00550568	0.00550568	1	20	0.485555		20	0.000639948	0.000888402	1			0.000888402	1	20	0.99453			20	0.000820398	0.000792893	1			0.000792893	1	20	0.58309			20	0.215
	21	0.000905	0.005305	1	0.00521	0.00521	0.005305	1	21	0.498221			21	0.00254951	0.00542815	1	0.00542815	0.00542815	0.00542815	1	21	0.509832		21	0.000521036	0.000865074	1			0.000865074	1	21	1.04426			21	0.000877931	0.000734694	1			0.000734694	1	21	0.612245			21	0.215
	22	0.001446	0.00521	1	0.004941	0.004941	0.00521	1	22	0.521945			22	0.00261111	0.00533594	1	0.00533594	0.00533594	0.00533594	1	22	0.53411		22	0.000796509	0.000796509	1			0.000796509	1	22	1.09398			22	0.000734694	0.000714286	1			0.000714286	1	22	0.641399			22	0.215
	23	0.002354	0.004941	1	0.004791	0.004791	0.004941	1	23	0.54567			23	0.0247259	0.005335	1	0.005335	0.005335	0.005335	1	23	0.558388		23	0.000888402	0.000775972	1			0.000775972	1	23	1.14371			23	0.000412307	0.000671069	1			0.000671069	1	23	0.670554			23	0.215
	24	0.000842	0.004791	1	0.004366	0.004366	0.004791	1	24	0.569395			24	0.000708333	0.005329	1	0.005329	0.005329	0.005329	1	24	0.582666		24	0.000531975	0.000740741	1			0.000740741	1	24	1.19344			24	0.000612245	0.000662136	1			0.000662136	1	24	0.699708			24	0.215
	25	0.00521	0.004366	1	0.004065	0.004065	0.004366	1	25	0.59312			25	0.0005	0.00447776	1	0.00447776	0.00447776	0.00447776	1	25	0.606943		25	0.000323537	0.000739821	1			0.000739821	1	25	1.24316			25	0.00141141	0.000649951	1			0.000649951	1	25	0.728863			25	0.215
	26	0.001552	0.004065	1	0.004041	0.004041	0.004065	1	26	0.616845			26	0.000668977	0.00396092	1	0.00396092	0.00396092	0.00396092	1	26	0.631221		26	0.000719869	0.000734276	1			0.000734276	1	26	1.29289			26	0.000591479	0.000631639	1			0.000631639	1	26	0.758017			26	0.175
	27	0.000951	0.004041	1	0.003841	0.003841	0.004041	1	27	0.640569			27	0.000779759	0.0037537	1	0.0037537	0.0037537	0.0037537	1	27	0.655499		27	0.000734276	0.000719869	1			0.000719869	1	27	1.34262			27	0.000884354	0.000612245	1			0.000612245	1	27	0.787172			27	0.175
	28	0.001284	0.003841	1	0.003796	0.003796	0.003841	1	28	0.664294			28	0.000434791	0.00350044	1	0.00350044	0.00350044	0.00350044	1	28	0.679777		28	0.000698376	0.000698376	1			0.000698376	1	28	1.39234			28	0.00114843	0.000591479	1			0.000591479	1	28	0.816327			28	0.175
	29	0.000392	0.003796	1	0.003758	0.003758	0.003796	1	29	0.688019			29	0.000796041	0.0034	1	0.0034	0.0034	0.0034	1	29	0.704054		29	0.00115439	0.000677466	1			0.000677466	1	29	1.44207			29	0.000662136	0.000568087	1			0.000568087	1	29	0.845481			29	0.175
	30	0.000512	0.003758	1	0.003697	0.003697	0.003758	1	30	0.711744			30	0.000959239	0.003334	1	0.003334	0.003334	0.003334	1	30	0.728332		30	0.000674566	0.000674566	1			0.000674566	1	30	1.4918			30	0.000919432	0.000564315	1			0.000564315	1	30	0.874636			30	0.175
	31	0.003841	0.003697	1	0.002958	0.002958	0.003697	1	31	0.735469			31	0.00190536	0.003	1	0.003	0.003	0.003	1	31	0.75261		31	0.00123752	0.000639948	1			0.000639948	1	31	1.54152			31	0.000993749	0.000412307	1			0.000412307	1	31	0.90379			31	0.175
	32	0.000537	0.002958	1	0.002937	0.002937	0.002958	1	32	0.759193			32	0.000830202	0.00291786	1	0.00291786	0.00291786	0.00291786	1	32	0.776888		32	0.000942389	0.000614348	1			0.000614348	1	32	1.59125															32	0.175
	33	0.000775	0.002937	1	0.002927	0.002927	0.002937	1	33	0.782918			33	0.000333333	0.00273415	1	0.00273415	0.00273415	0.00273415	1	33	0.801165		33	0.00110195	0.000585745	1			0.000585745	1	33	1.64097															33	0.175
	34	0.003758	0.002927	1	0.002819	0.002819	0.002927	1	34	0.806643			34	0.00250262	0.00266724	1	0.00266724	0.00266724	0.00266724	1	34	0.825443		34	0.00149659	0.000565263	1			0.000565263	1	34	1.6907															34	0.175
	35	0.026491	0.002819	2	Duplicate		0.002819	2	36	0.854093			35	0.00447776	0.00261111	1	0.00261111	0.00261111	0.00261111	1	35	0.849721		35	0.000424426	0.000560896	1			0.000560896	1	35	1.74043															35	0.14
	36	0.000928	0.002819	2	0.002756	0.002756	0.002756	1	37	0.877817			36	0.000427446	0.00254951	1	0.00254951	0.00254951	0.00254951	1	36	0.873999		36	0.000347061	0.000544151	1			0.000544151	1	36	1.79015															36	0.14
	37	0.000693	0.002756	1	0.002569	0.002569	0.002569	1	38	0.901542			37	0.00059964	0.00250262	1	0.00250262	0.00250262	0.00250262	1	37	0.898276		37	0.000258285	0.000542236	1			0.000542236	1	37	1.83988															37	0.14
	38	0.001522	0.002569	1	0.002475	0.002475	0.002475	1	39	0.925267			38	0.00058482	0.00242057	1	0.00242057	0.00242057	0.00242057	1	38	0.922554		38	0.000775972	0.000534822	1			0.000534822	1	38	1.88961															38	0.14
	39	0.000678	0.002475	1	0.002377	0.002377	0.002377	1	40	0.948992			39	0.000619048	0.0023947	1	0.0023947	0.0023947	0.0023947	1	39	0.946832		39	0.00450302	0.000531975	1			0.000531975	1	39	1.93933															39	0.14
	40	0.000504	0.002377	1	0.002354	0.002354	0.002354	1	41	0.972716			40	0.0037537	0.00229364	1	0.00229364	0.00229364	0.00229364	1	40	0.971109		40	0.000560896	0.000530243	1			0.000530243	1	40	1.98906															40	0.115
	41	0.000709	0.002354	1	0.002199	0.002199	0.002199	2	43	1.02017			41	0.0206856	0.00224012	1	0.00224012	0.00224012	0.00224012	1	41	0.995387		41	0.000544151	0.000521036	1			0.000521036	1	41	2.03879															41	0.115
	42	0.000693	0.002199	2	Duplicate		0.002141	1	44	1.04389			42	0.0015	0.00222511	1	0.00222511	0.00222511	0.00222511	1	42	1.01966		42	0.00102028	0.000424426	1			0.000424426	1	42	2.08851															42	0.115
	43	0.000672	0.002199	2	0.002141	0.002141	0.002116	1	45	1.06762			43	0.00186753	0.00218529	1	0.00218529	0.00218529	0.00218529	1	43	1.04394		43	0.000530243	0.000347061	1			0.000347061	1	43	2.13824															43	0.115
	44	0.000756	0.002141	1	0.002116	0.002116	0.002045	2	47	1.11507			44	0.000333333	0.00208706	1	0.00208706	0.00208706	0.00208706	1	44	1.06822		44	0.000565263	0.000323537	1			0.000323537	1	44	2.18797															44	0.115
	45	0.001438	0.002116	1	0.002045	0.002045	0.001961	1	48	1.13879			45	0.00542815	0.00200693	1	0.00200693	0.00200693	0.00200693	1	45	1.0925		45	0.000865074	0.000258285	1			0.000258285	1	45	2.23769															45	0.115
	46	0.000428	0.002045	2	Duplicate		0.001856	1	49	1.16251			46	0.000428571	0.00193448	1	0.00193448	0.00193448	0.00193448	1	46	1.11678																										46	0.095
	47	0.00028	0.002045	2	0.001961	0.001961	0.001851	1	50	1.18624			47	0.000333333	0.00191248	1	0.00191248	0.00191248	0.00191248	1	47	1.14105																										47	0.075
	48	0.002927	0.001961	1	0.001856	0.001856	0.001825	1	51	1.20996			48	0.000351364	0.00190536	1	0.00190536	0.00190536	0.00190536	1	48	1.16533																										48	0.075
	49	0.000322	0.001856	1	0.001851	0.001851	0.001815	1	52	1.23369			49	0.000585973	0.00190192	1	0.00190192	0.00190192	0.00190192	1	49	1.18961																										49	0.075
	50	0.000816	0.001851	1	0.001825	0.001825	0.00181	1	53	1.25741			50	0.00166735	0.0018962	1	0.0018962	0.0018962	0.0018962	1	50	1.21389																										50	0.065
	51	0.000336	0.001825	1	0.001815	0.001815	0.001693	1	54	1.28114			51	0.000478566	0.00187735	1	0.00187735	0.00187735	0.00187735	1	51	1.23816																										51	0.062
	52	0.000907	0.001815	1	0.00181	0.00181	0.001689	1	55	1.30486			52	0.000405518	0.00186753	1	0.00186753	0.00186753	0.00186753	1	52	1.26244																										52	0.05
	53	0.00059	0.00181	1	0.001693	0.001693	0.001651	1	56	1.32859			53	0.000527046	0.00177271	1	0.00177271	0.00177271	0.00177271	1	53	1.28672
	54	0.001279	0.001693	1	0.001689	0.001689	0.001631	1	57	1.35231			54	0.000339935	0.00176255	1	0.00176255	0.00176255	0.00176255	1	54	1.311
	55	0.000884	0.001689	1	0.001651	0.001651	0.001626	1	58	1.37604			55	0.000477907	0.00167037	1	0.00167037	0.00167037	0.00167037	1	55	1.33528
	56	0.001205	0.001651	1	0.001631	0.001631	0.001598	1	59	1.39976			56	0.000760117	0.00166735	1	0.00166735	0.00166735	0.00166735	1	56	1.35955
	57	0.00081	0.001631	1	0.001626	0.001626	0.001573	1	60	1.42349			57	0.000471405	0.00160295	1	0.00160295	0.00160295	0.00160295	1	57	1.38383
	58	0.001048	0.001626	1	0.001598	0.001598	0.001571	1	61	1.44721			58	0.0121342	0.00158431	1	0.00158431	0.00158431	0.00158431	1	58	1.40811
	59	0.000792	0.001598	1	0.001573	0.001573	0.00157	1	62	1.47094			59	0.000416667	0.00158282	1	0.00158282	0.00158282	0.00158282	1	59	1.43239
	60	0.020002	0.001573	1	0.001571	0.001571	0.001552	1	63	1.49466			60	0.00820103	0.0015558	1	0.0015558	0.0015558	0.0015558	1	60	1.45666
	61	0.001033	0.001571	1	0.00157	0.00157	0.001522	1	64	1.51839			61	0.000497157	0.00154392	1	0.00154392	0.00154392	0.00154392	1	61	1.48094
	62	0.002045	0.00157	1	0.001552	0.001552	0.001493	1	65	1.54211			62	0.000485913	0.00153049	1	0.00153049	0.00153049	0.00153049	1	62	1.50522
	63	0.014676	0.001552	1	0.001522	0.001522	0.001489	1	66	1.56584			63	0.000690139	0.00150231	1	0.00150231	0.00150231	0.00150231	1	63	1.5295
	64	0.021091	0.001522	1	0.001493	0.001493	0.001474	1	67	1.58956			64	0.000727014	0.0015	1	0.0015	0.0015	0.0015	1	64	1.55378
	65	0.001571	0.001493	1	0.001489	0.001489	0.001451	1	68	1.61329			65	0.00187735	0.0014605	1	0.0014605	0.0014605	0.0014605	1	65	1.57805
	66	0.007229	0.001489	1	0.001474	0.001474	0.001446	1	69	1.63701			66	0.000668365	0.00142857	1	0.00142857	0.00142857	0.00142857	1	66	1.60233
	67	0.00851	0.001474	1	0.001451	0.001451	0.001438	1	70	1.66074			67	0.0014605	0.00141667	1	0.00141667	0.00141667	0.00141667	1	67	1.62661
	68	0.003697	0.001451	1	0.001446	0.001446	0.001436	1	71	1.68446			68	0.000392677	0.00139333	1	0.00139333	0.00139333	0.00139333	1	68	1.65089
	69	0.000959	0.001446	1	0.001438	0.001438	0.001426	1	72	1.70819			69	0.00533594	0.00138095	1	0.00138095	0.00138095	0.00138095	1	69	1.67516
	70	0.00056	0.001438	1	0.001436	0.001436	0.001393	1	73	1.73191			70	0.00133362	0.00135443	1	0.00135443	0.00135443	0.00135443	1	70	1.69944
	71	0.001474	0.001436	1	0.001426	0.001426	0.001345	3	76	1.80308			71	0.00100113	0.00134258	1	0.00134258	0.00134258	0.00134258	1	71	1.72372
	72	0.000896	0.001426	1	0.001393	0.001393	0.001284	2	78	1.85053			72	0.000566558	0.00133362	1	0.00133362	0.00133362	0.00133362	1	72	1.748
	73	0.002756	0.001393	1	0.001345	0.001345	0.001279	1	79	1.87426			73	0.000380952	0.00133333	1	0.00133333	0.00133333	0.00133333	1	73	1.77227
	74	0.009548	0.001345	3	Duplicate		0.001253	1	80	1.89798			74	0.0006	0.00127899	1	0.00127899	0.00127899	0.00127899	1	74	1.79655
	75	0.000603	0.001345	3	Duplicate		0.00124	1	81	1.92171			75	0.00069602	0.00125031	1	0.00125031	0.00125031	0.00125031	1	75	1.82083
	76	0.001631	0.001345	3	0.001284	0.001284	0.001232	2	83	1.96916			76	0.0119335	0.00125	1	0.00125	0.00125	0.00125	1	76	1.84511
	77	0.001345	0.001284	2	Duplicate		0.001205	1	84	1.99288			77	0.000810923	0.00119477	1	0.00119477	0.00119477	0.00119477	1	77	1.86939
	78	0.000511	0.001284	2	0.001279	0.001279	0.001176	2	86	2.04033			78	0.000238095	0.00117195	1	0.00117195	0.00117195	0.00117195	1	78	1.89366
	79	0.00053	0.001279	1	0.001253	0.001253	0.001126	1	87	2.06406			79	0.000822059	0.00116799	1	0.00116799	0.00116799	0.00116799	1	79	1.91794
	80	0.009334	0.001253	1	0.00124	0.00124	0.001122	1	88	2.08778			80	0.000666667	0.0011661	1	0.0011661	0.0011661	0.0011661	1	80	1.94222
	81	0.004791	0.00124	1	0.001232	0.001232	0.001121	1	89	2.11151			81	0.00222511	0.00114385	1	0.00114385	0.00114385	0.00114385	1	81	1.9665
	82	0.002199	0.001232	2	Duplicate		0.00112	1	90	2.13523			82	0.000946077	0.00113529	1	0.00113529	0.00113529	0.00113529	1	82	1.99077
	83	0.001084	0.001232	2	0.001205	0.001205	0.001096	1	91	2.15896			83	0.003	0.00113192	1	0.00113192	0.00113192	0.00113192	1	83	2.01505
	84	0.000594	0.001205	1	0.001176	0.001176	0.001084	2	93	2.20641			84	0.000938425	0.00112577	1	0.00112577	0.00112577	0.00112577	1	84	2.03933
	85	0.001022	0.001176	2	Duplicate		0.001076	2	95	2.25386			85	0.00154392	0.00111665	1	0.00111665	0.00111665	0.00111665	1	85	2.06361
	86	0.000504	0.001176	2	0.001126	0.001126	0.001048	1	96	2.27758			86	0.000714286	0.00111111	1	0.00111111	0.00111111	0.00111111	1	86	2.08789
	87	0.000676	0.001126	1	0.001122	0.001122	0.001039	1	97	2.3013			87	0.00658333	0.00109608	1	0.00109608	0.00109608	0.00109608	1	87	2.11216
	88	0.000425	0.001122	1	0.001121	0.001121	0.001033	1	98	2.32503			88	0.000527778	0.00106479	1	0.00106479	0.00106479	0.00106479	1	88	2.13644
	89	0.000672	0.001121	1	0.00112	0.00112	0.001022	1	99	2.34875			89	0.00101465	0.00105409	1	0.00105409	0.00105409	0.00105409	1	89	2.16072
	90	0.001573	0.00112	1	0.001096	0.001096	0.001015	1	100	2.37248			90	0.000558326	0.00104411	1	0.00104411	0.00104411	0.00104411	1	90	2.185
	91	0.001096	0.001096	1	0.001084	0.001084	0.001008	3	103	2.44365			91	0.01524	0.00103115	1	0.00103115	0.00103115	0.00103115	1	91	2.20927
	92	0.000612	0.001084	2	Duplicate		0.000959	1	104	2.46738			92	0.000625	0.00102489	1	0.00102489	0.00102489	0.00102489	1	92	2.23355
	93	0.001651	0.001084	2	0.001076	0.001076	0.000954	1	105	2.4911			93	0.00613858	0.00101465	1	0.00101465	0.00101465	0.00101465	1	93	2.25783
	94	0.001015	0.001076	2	Duplicate		0.000951	3	108	2.56228			94	0.0023947	0.00100615	2	0.00100615	0.00100615	0.00100615	2	95	2.30639
	95	0.000462	0.001076	2	0.001048	0.001048	0.000928	5	113	2.6809			95	0.00190192	0.00100615	2	Duplicate		0.00100154	2	97	2.35494
	96	0.000471	0.001048	1	0.001039	0.001039	0.000907	1	114	2.70463			96	0.00139333	0.00100154	2	0.00100154	0.00100154	0.00100113	1	98	2.37922
	97	0.004941	0.001039	1	0.001033	0.001033	0.000905	1	115	2.72835			97	0.005335	0.00100154	2	Duplicate		0.00100022	1	99	2.4035
	98	0.000672	0.001033	1	0.001022	0.001022	0.000903	1	116	2.75208			98	0.00153049	0.00100113	1	0.00100113	0.00100113	0.001	2	101	2.45205
	99	0.002141	0.001022	1	0.001015	0.001015	0.000899	1	117	2.7758			99	0.000777778	0.00100022	1	0.00100022	0.00100022	0.000990953	1	102	2.47633
	100	0.00112	0.001015	1	0.001008	0.001008	0.000896	1	118	2.79953			100	0.00113192	0.001	2	0.001	0.001	0.000986232	1	103	2.50061
	101	0.000678	0.001008	3	Duplicate		0.000884	1	119	2.82325			101	0.0018962	0.001	2	Duplicate		0.000959239	1	104	2.52488
	102	0.000928	0.001008	3	Duplicate		0.000857	1	120	2.84698			102	0.000397717	0.000990953	1	0.000990953	0.000990953	0.000946077	1	105	2.54916
	103	0.000903	0.001008	3	0.000959	0.000959	0.000842	1	121	2.8707			103	0.00111665	0.000986232	1	0.000986232	0.000986232	0.000944853	1	106	2.57344
	104	0.000451	0.000959	1	0.000954	0.000954	0.00084	1	122	2.89442			104	0.001	0.000959239	1	0.000959239	0.000959239	0.000938425	1	107	2.59772
	105	0.001851	0.000954	1	0.000951	0.000951	0.000818	1	123	2.91815			105	0.00113529	0.000946077	1	0.000946077	0.000946077	0.000916667	1	108	2.622
	106	0.001039	0.000951	3	Duplicate		0.000816	2	125	2.9656			106	0.000447214	0.000944853	1	0.000944853	0.000944853	0.000909761	1	109	2.64627
	107	0.000928	0.000951	3	Duplicate		0.00081	1	126	2.98932			107	0.000520683	0.000938425	1	0.000938425	0.000938425	0.000906014	1	110	2.67055
	108	0.002116	0.000951	3	0.000928	0.000928	0.000802	1	127	3.01305			108	0.000733333	0.000916667	1	0.000916667	0.000916667	0.000904379	1	111	2.69483
	109	0.000951	0.000928	5	Duplicate		0.000792	1	128	3.03677			109	0.000904379	0.000909761	1	0.000909761	0.000909761	0.000893142	1	112	2.71911
	110	0.004065	0.000928	5	Duplicate		0.000775	1	129	3.0605			110	0.000592561	0.000906014	1	0.000906014	0.000906014	0.000878052	1	113	2.74338
	111	0.002819	0.000928	5	Duplicate		0.000774	1	130	3.08422			111	0.0011661	0.000904379	1	0.000904379	0.000904379	0.000867219	1	114	2.76766
	112	0.002819	0.000928	5	Duplicate		0.000761	2	132	3.13167			112	0.0345001	0.000893142	1	0.000893142	0.000893142	0.000858465	1	115	2.79194
	113	0.000928	0.000928	5	0.000907	0.000907	0.000756	1	133	3.1554			113	0.00242057	0.000878052	1	0.000878052	0.000878052	0.000849837	1	116	2.81622
	114	0.001121	0.000907	1	0.000905	0.000905	0.000709	1	134	3.17912			114	0.00052381	0.000867219	1	0.000867219	0.000867219	0.00083749	1	117	2.8405
	115	0.000761	0.000905	1	0.000903	0.000903	0.000693	2	136	3.22657			115	0.000444444	0.000858465	1	0.000858465	0.000858465	0.000833333	1	118	2.86477
	116	0.020587	0.000903	1	0.000899	0.000899	0.000679	2	138	3.27402			116	0.000392837	0.000849837	1	0.000849837	0.000849837	0.000830202	1	119	2.88905
	117	0.001176	0.000899	1	0.000896	0.000896	0.000678	2	140	3.32147			117	0.00127899	0.00083749	1	0.00083749	0.00083749	0.000822059	2	121	2.93761
	118	0.00056	0.000896	1	0.000884	0.000884	0.000676	1	141	3.3452			118	0.00142857	0.000833333	1	0.000833333	0.000833333	0.000822032	1	122	2.96188
	119	0.000588	0.000884	1	0.000857	0.000857	0.000672	5	146	3.46382			119	0.00229364	0.000830202	1	0.000830202	0.000830202	0.000813182	1	123	2.98616
	120	0.001345	0.000857	1	0.000842	0.000842	0.000645	1	147	3.48754			120	0.000451452	0.000822059	2	0.000822059	0.000822059	0.000811035	1	124	3.01044
	121	0.005547	0.000842	1	0.00084	0.00084	0.000616	1	148	3.51127			121	0.000375145	0.000822059	2	Duplicate		0.000810923	1	125	3.03472
	122	0.00084	0.00084	1	0.000818	0.000818	0.000612	2	150	3.55872			122	0.000909761	0.000822032	1	0.000822032	0.000822032	0.000809524	1	126	3.05899
	123	0.000428	0.000818	1	0.000816	0.000816	0.000603	1	151	3.58244			123	0.00100022	0.000813182	1	0.000813182	0.000813182	0.000807469	1	127	3.08327
	124	0.000802	0.000816	2	Duplicate		0.000594	1	152	3.60617			124	0.000796041	0.000811035	1	0.000811035	0.000811035	0.000806034	1	128	3.10755
	125	0.001825	0.000816	2	0.00081	0.00081	0.00059	1	153	3.62989			125	0.000503077	0.000810923	1	0.000810923	0.000810923	0.0008	1	129	3.13183
	126	0.000645	0.00081	1	0.000802	0.000802	0.000588	1	154	3.65362			126	0.000555556	0.000809524	1	0.000809524	0.000809524	0.000796041	2	131	3.18038
	127	0.001626	0.000802	1	0.000792	0.000792	0.000571	2	156	3.70107			127	0.00075	0.000807469	1	0.000807469	0.000807469	0.000790569	1	132	3.20466
	128	0.00157	0.000792	1	0.000775	0.000775	0.00056	2	158	3.74852			128	0.0200007	0.000806034	1	0.000806034	0.000806034	0.000785674	1	133	3.22894
	129	0.000517	0.000775	1	0.000774	0.000774	0.000542	1	159	3.77224			129	0.00141667	0.0008	1	0.0008	0.0008	0.000779759	1	134	3.25322
	130	0.001122	0.000774	1	0.000761	0.000761	0.000537	1	160	3.79597			130	0.000806034	0.000796041	2	0.000796041	0.000796041	0.000777778	2	136	3.30177
	131	0.000542	0.000761	2	Duplicate		0.00053	1	161	3.81969			131	0.00125031	0.000796041	2	Duplicate		0.000760117	1	137	3.32605
	132	0.002958	0.000761	2	0.000756	0.000756	0.000517	1	162	3.84342			132	0.000667967	0.000790569	1	0.000790569	0.000790569	0.000757856	1	138	3.35033
	133	0.001598	0.000756	1	0.000709	0.000709	0.000512	2	164	3.89087			133	0.000666667	0.000785674	1	0.000785674	0.000785674	0.000755637	1	139	3.37461
	134	0.001426	0.000709	1	0.000693	0.000693	0.000511	1	165	3.91459			134	0.000447917	0.000779759	1	0.000779759	0.000779759	0.000754615	2	141	3.42316
	135	0.000928	0.000693	2	Duplicate		0.000504	2	167	3.96204			135	0.00052381	0.000777778	2	0.000777778	0.000777778	0.00075	2	143	3.47172
	136	0.000571	0.000693	2	0.000679	0.000679	0.000471	3	170	4.03321			136	0.00114385	0.000777778	2	Duplicate		0.000741204	1	144	3.49599
	137	0.000816	0.000679	2	Duplicate		0.000462	1	171	4.05694			137	0.000813182	0.000760117	1	0.000760117	0.000760117	0.000733333	1	145	3.52027
	138	0.001345	0.000679	2	0.000678	0.000678	0.000451	1	172	4.08066			138	0.000722756	0.000757856	1	0.000757856	0.000757856	0.000727014	1	146	3.54455
	139	0.002377	0.000678	2	Duplicate		0.000428	2	174	4.12811			139	0.00100615	0.000755637	1	0.000755637	0.000755637	0.000722756	1	147	3.56883
	140	0.002569	0.000678	2	0.000676	0.000676	0.000425	1	175	4.15184			140	0.000675863	0.000754615	2	0.000754615	0.000754615	0.000720607	2	149	3.61738
	141	0.000954	0.000676	1	0.000672	0.000672	0.00042	1	176	4.17556			141	0.000606676	0.000754615	2	Duplicate		0.00071958	1	150	3.64166
	142	0.000774	0.000672	5	Duplicate		0.000392	1	177	4.19929			142	0.000790569	0.00075	2	0.00075	0.00075	0.000715871	1	151	3.66594
	143	0.005305	0.000672	5	Duplicate		0.000336	1	178	4.22301			143	0.000613965	0.00075	2	Duplicate		0.000714286	1	152	3.69022
	144	0.000672	0.000672	5	Duplicate		0.000322	1	179	4.24674			144	0.00028125	0.000741204	1	0.000741204	0.000741204	0.000708333	1	153	3.71449
	145	0.001961	0.000672	5	Duplicate		0.00028	1	180	4.27046			145	0.000990953	0.000733333	1	0.000733333	0.000733333	0.00069602	1	154	3.73877
	146	0.000616	0.000672	5	0.000645	0.000645	0.000256			4.29419			146	0.000809524	0.000727014	1	0.000727014	0.000727014	0.000690139	1	155	3.76305
	147	0.001076	0.000645	1	0.000616	0.000616							147	0.003334	0.000722756	1	0.000722756	0.000722756	0.000687184	1	156	3.78733
	148	0.002045	0.000616	1	0.000612	0.000612							148	0.0015558	0.000720607	2	0.000720607	0.000720607	0.000675863	1	157	3.8116
	149	0.000256	0.000612	2	Duplicate								149	0.00075	0.000720607	2	Duplicate		0.000668977	1	158	3.83588
	150	0.000471	0.000612	2	0.000603	0.000603							150	0.00100154	0.00071958	1	0.00071958	0.00071958	0.000668365	1	159	3.86016
	151	0.00042	0.000603	1	0.000594	0.000594							151	0.000571429	0.000715871	1	0.000715871	0.000715871	0.000667967	1	160	3.88444
	152	0.001436	0.000594	1	0.00059	0.00059							152	0.000573409	0.000714286	1	0.000714286	0.000714286	0.000667245	1	161	3.90872
	153	0.00181	0.00059	1	0.000588	0.000588							153	0.000720607	0.000708333	1	0.000708333	0.000708333	0.000666667	2	163	3.95727
	154	0.000612	0.000588	1	0.000571	0.000571							154	0.000625	0.00069602	1	0.00069602	0.00069602	0.000656993	1	164	3.98155
	155	0.000761	0.000571	2	Duplicate								155	0.000573409	0.000690139	1	0.000690139	0.000690139	0.000626331	1	165	4.00583
	156	0.004366	0.000571	2	0.00056	0.00056							156	0.00106479	0.000687184	1	0.000687184	0.000687184	0.000625	3	168	4.07866
	157	0.000512	0.00056	2	Duplicate								157	0.00191248	0.000675863	1	0.000675863	0.000675863	0.000619048	2	170	4.12722
	158	0.020489	0.00056	2	0.000542	0.000542							158	0.00150231	0.000668977	1	0.000668977	0.000668977	0.000613965	1	171	4.15149
	159	0.009682	0.000542	1	0.000537	0.000537							159	0.00266724	0.000668365	1	0.000668365	0.000668365	0.000611111	1	172	4.17577
	160	0.000857	0.000537	1	0.00053	0.00053							160	0.000916667	0.000667967	1	0.000667967	0.000667967	0.000609887	1	173	4.20005
	161	0.001126	0.00053	1	0.000517	0.000517							161	0.000540865	0.000667245	1	0.000667245	0.000667245	0.000606676	1	174	4.22433
	162	0.000818	0.000517	1	0.000512	0.000512							162	0.000625	0.000666667	2	0.000666667	0.000666667	0.000602698	1	175	4.2486
	163	0.00124	0.000512	2	Duplicate								163	0.000849837	0.000666667	2	Duplicate		0.000602339	1	176	4.27288
	164	0.002475	0.000512	2	0.000511	0.000511							164	0.00109608	0.000656993	1	0.000656993	0.000656993	0.0006	1	177	4.29716
	165	0.003796	0.000511	1	0.000504	0.000504							165	0.000506897	0.000626331	1	0.000626331	0.000626331	0.00059964	1	178	4.32144
	166	0.001008	0.000504	2	Duplicate								166	0.00200693	0.000625	3	0.000625	0.000625	0.000592561	1	179	4.34571
	167	0.006356	0.000504	2	0.000471	0.000471							167	0.00550568	0.000625	3	Duplicate		0.000585973	1	180	4.36999
	168	0.001815	0.000471	3	Duplicate								168	0.000310565	0.000625	3	Duplicate		0.00058482	1	181	4.39427
	169	0.001284	0.000471	3	Duplicate								169	0.000528508	0.000619048	2	0.000619048	0.000619048	0.000583333	2	183	4.44283
	170	0.001493	0.000471	3	0.000462	0.000462							170	0.000777778	0.000619048	2	Duplicate		0.000573409	2	185	4.49138
	171	0.000471	0.000462	1	0.000451	0.000451							171	0.0163444	0.000613965	1	0.000613965	0.000613965	0.000571429	1	186	4.51566
	172	0.001693	0.000451	1	0.000428	0.000428							172	0.000807469	0.000611111	1	0.000611111	0.000611111	0.000566558	2	188	4.56421
	173	0.001393	0.000428	2	Duplicate								173	0.000755637	0.000609887	1	0.000609887	0.000609887	0.000558326	1	189	4.58849
	174	0.000679	0.000428	2	0.000425	0.000425							174	0.000545747	0.000606676	1	0.000606676	0.000606676	0.000555556	1	190	4.61277
	175	0.001489	0.000425	1	0.00042	0.00042							175	0.000532397	0.000602698	1	0.000602698	0.000602698	0.000545747	1	191	4.63705
	176	0.001689	0.00042	1	0.000392	0.000392							176	0.00135443	0.000602339	1	0.000602339	0.000602339	0.000544094	1	192	4.66133
	177	0.001176	0.000392	1	0.000336	0.000336							177	0.000542941	0.0006	1	0.0006	0.0006	0.000542941	1	193	4.6856
	178	0.001076	0.000336	1	0.000322	0.000322							178	0.000667245	0.00059964	1	0.00059964	0.00059964	0.000540865	1	194	4.70988
	179	0.002937	0.000322	1	0.00028	0.00028							179	0.00218529	0.000592561	1	0.000592561	0.000592561	0.000532397	1	195	4.73416
	180	0.405457	0.00028	1	0.000256	0.000256							180	0.000626331	0.000585973	1	0.000585973	0.000585973	0.00053125	1	196	4.75844
	181	0.204368	0.000256	1	0	0							181	0.000619048	0.00058482	1	0.00058482	0.00058482	0.000528508	1	197	4.78271
													182	0.000906014	0.000583333	2	0.000583333	0.000583333	0.000527778	2	199	4.83127
													183	0.00112577	0.000583333	2	Duplicate		0.000527046	1	200	4.85555
													184	0.00167037	0.000573409	2	0.000573409	0.000573409	0.00052381	3	203	4.92838
													185	0.000720607	0.000573409	2	Duplicate		0.000520683	1	204	4.95266
													186	0.000479519	0.000571429	1	0.000571429	0.000571429	0.000514201	1	205	4.97694
													187	0.00105409	0.000566558	2	0.000566558	0.000566558	0.000506897	1	206	5.00121
													188	0.000687184	0.000566558	2	Duplicate		0.000503077	2	208	5.04977
													189	0.000822059	0.000558326	1	0.000558326	0.000558326	0.000501733	2	210	5.09832
													190	0.00100615	0.000555556	1	0.000555556	0.000555556	0.0005	1	211	5.1226
													191	0.00894155	0.000545747	1	0.000545747	0.000545747	0.000497157	1	212	5.14688
													192	0.0085	0.000544094	1	0.000544094	0.000544094	0.000485913	1	213	5.17116
													193	0.000583333	0.000542941	1	0.000542941	0.000542941	0.000479519	1	214	5.19544
													194	0.00083749	0.000540865	1	0.000540865	0.000540865	0.000478566	1	215	5.21971
													195	0.000754615	0.000532397	1	0.000532397	0.000532397	0.000477907	1	216	5.24399
													196	0.000785674	0.00053125	1	0.00053125	0.00053125	0.000471405	1	217	5.26827
													197	0.000566558	0.000528508	1	0.000528508	0.000528508	0.000451452	1	218	5.29255
													198	0.00111111	0.000527778	2	0.000527778	0.000527778	0.000448401	1	219	5.31682
													199	0.000503077	0.000527778	2	Duplicate		0.000447917	1	220	5.3411
													200	0.00396092	0.000527046	1	0.000527046	0.000527046	0.000447214	1	221	5.36538
													201	0.00193448	0.00052381	3	0.00052381	0.00052381	0.000444444	1	222	5.38966
													202	0.0034	0.00052381	3	Duplicate		0.000438614	1	223	5.41394
													203	0.000858465	0.00052381	3	Duplicate		0.000434791	1	224	5.43821
													204	0.0328333	0.000520683	1	0.000520683	0.000520683	0.000428571	1	225	5.46249
													205	0.00133333	0.000514201	1	0.000514201	0.000514201	0.000427446	1	226	5.48677
													206	0.00273415	0.000506897	1	0.000506897	0.000506897	0.000416667	1	227	5.51105
													207	0.000611111	0.000503077	2	0.000503077	0.000503077	0.000405518	1	228	5.53532
													208	0.00052381	0.000503077	2	Duplicate		0.000397717	1	229	5.5596
													209	0.00176255	0.000501733	2	0.000501733	0.000501733	0.000392837	1	230	5.58388
													210	0.005329	0.000501733	2	Duplicate		0.000392677	1	231	5.60816
													211	0.000757856	0.0005	1	0.0005	0.0005	0.000380952	1	232	5.63244
													212	0.000656993	0.000497157	1	0.000497157	0.000497157	0.000375145	1	233	5.65671
													213	0.000438614	0.000485913	1	0.000485913	0.000485913	0.000351364	1	234	5.68099
													214	0.000583333	0.000479519	1	0.000479519	0.000479519	0.000339935	1	235	5.70527
													215	0.000878052	0.000478566	1	0.000478566	0.000478566	0.000333333	3	238	5.7781
													216	0.00025	0.000477907	1	0.000477907	0.000477907	0.000310565	1	239	5.80238
													217	0.00100154	0.000471405	1	0.000471405	0.000471405	0.000285714	1	240	5.82666
													218	0.000602698	0.000451452	1	0.000451452	0.000451452	0.00028125	1	241	5.85093
													219	0.000501733	0.000448401	1	0.000448401	0.000448401	0.00025	1	242	5.87521
													220	0.00134258	0.000447917	1	0.000447917	0.000447917	0.000238095	1	243	5.89949
													221	0.000602339	0.000447214	1	0.000447214	0.000447214
													222	0.000822032	0.000444444	1	0.000444444	0.000444444
													223	0.00104411	0.000438614	1	0.000438614	0.000438614
													224	0.00208706	0.000434791	1	0.000434791	0.000434791
													225	0.000754615	0.000428571	1	0.000428571	0.000428571
													226	0.00125	0.000427446	1	0.000427446	0.000427446
													227	0.000833333	0.000416667	1	0.000416667	0.000416667
													228	0.000285714	0.000405518	1	0.000405518	0.000405518
													229	0.00158431	0.000397717	1	0.000397717	0.000397717
													230	0.00053125	0.000392837	1	0.000392837	0.000392837
													231	0.000448401	0.000392677	1	0.000392677	0.000392677
													232	0.0329587	0.000380952	1	0.000380952	0.000380952
													233	0.0078322	0.000375145	1	0.000375145	0.000375145
													234	0.000893142	0.000351364	1	0.000351364	0.000351364
													235	0.000867219	0.000339935	1	0.000339935	0.000339935
													236	0.00102489	0.000333333	3	0.000333333	0.000333333
													237	0.000514201	0.000333333	3	Duplicate
													238	0.00158282	0.000333333	3	Duplicate
													239	0.00177271	0.000310565	1	0.000310565	0.000310565
													240	0.000544094	0.000285714	1	0.000285714	0.000285714
													241	0.000986232	0.00028125	1	0.00028125	0.00028125
													242	0.13	0.00025	1	0.00025	0.00025
													243	0.121498	0.000238095	1	0.000238095	0.000238095
[truncated: 19 more columns]

## Sheet: Set B Fractures - NE
RR Microscanline	Microfracture	Aperture (mm)	Aperture (mm) sorted	Frequency	Aperture duplicates	no duplicates	no empty cells	Frequency	Cumulative Frequency	Cum Freq/Length		BR Microscanline	Microfracture	Aperture (mm)	Aperture (mm) sorted	Frequency	Aperture duplicates	no duplicates	no empty cells	Frequency	Cumulative Frequency	Cum Freq/Length
RR-4	1	0.00102285	0.00166811	1			0.00166811	1	1	0.0291545		BR-21-3	1	0.000619823	0.00115885	1	0.00115885	0.00115885	0.00115885	1	1	0.0497265
34.30 mm	2	0.00125639	0.00144628	1			0.00144628	1	2	0.058309		20.11 mm	2	0.00027719	0.00104727	1	0.00104727	0.00104727	0.00104727	1	2	0.099453
	3	0.000931978	0.00139439	1			0.00139439	1	3	0.0874636			3	0.000314841	0.000963675	1	0.000963675	0.000963675	0.000963675	1	3	0.14918
	4	0.000960926	0.00137805	1			0.00137805	1	4	0.116618			4	0.000652422	0.000897007	1	0.000897007	0.000897007	0.000897007	1	4	0.198906
	5	0.000789612	0.00133466	1			0.00133466	1	5	0.145773			5	0.000617713	0.000855296	1	0.000855296	0.000855296	0.000855296	1	5	0.248633
	6	0.000805443	0.00125868	1			0.00125868	1	6	0.174927			6	0.000963675	0.000832804	1	0.000832804	0.000832804	0.000832804	1	6	0.298359
	7	0.000600167	0.00125639	1			0.00125639	1	7	0.204082			7	0.000520193	0.000797	1	0.000797	0.000797	0.000797	1	7	0.348086
	8	0.00106262	0.00124687	1			0.00124687	1	8	0.233236			8	0.00104727	0.000725036	1	0.000725036	0.000725036	0.000725036	1	8	0.397812
	9	0.000860484	0.00117734	1			0.00117734	1	9	0.262391			9	0.000520193	0.000713008	1	0.000713008	0.000713008	0.000713008	1	9	0.447539
	10	0.000588661	0.00116344	1			0.00116344	1	10	0.291545			10	0.000482114	0.000710842	1	0.000710842	0.000710842	0.000710842	1	10	0.497265
	11	0.000951992	0.00113539	1			0.00113539	1	11	0.3207			11	0.000582345	0.000709954	1	0.000709954	0.000709954	0.000709954	1	11	0.546992
	12	0.00103974	0.00110182	1			0.00110182	1	12	0.349854			12	0.000451138	0.000662207	1	0.000662207	0.000662207	0.000662207	1	12	0.596718
	13	0.00117734	0.00110153	1			0.00110153	1	13	0.379009			13	0.000606168	0.000652422	1	0.000652422	0.000652422	0.000652422	1	13	0.646445
	14	0.00104038	0.00106262	1			0.00106262	1	14	0.408163			14	0.000709954	0.000632092	1	0.000632092	0.000632092	0.000632092	1	14	0.696171
	15	0.00065801	0.00105832	1			0.00105832	1	15	0.437318			15	0.000713008	0.000619823	1	0.000619823	0.000619823	0.000619823	1	15	0.745898
	16	0.000871173	0.00104038	1			0.00104038	1	16	0.466472			16	0.000522412	0.000617713	1	0.000617713	0.000617713	0.000617713	1	16	0.795624
	17	0.000926142	0.00103974	1			0.00103974	1	17	0.495627			17	0.000662207	0.000614345	1	0.000614345	0.000614345	0.000614345	1	17	0.845351
	18	0.00110153	0.00102285	1			0.00102285	1	18	0.524781			18	0.000507236	0.000614131	1	0.000614131	0.000614131	0.000614131	1	18	0.895077
	19	0.00078933	0.0010225	1			0.0010225	1	19	0.553936			19	0.000832804	0.000606168	1	0.000606168	0.000606168	0.000606168	1	19	0.944804
	20	0.00116344	0.00102197	1			0.00102197	1	20	0.58309			20	0.000614131	0.000589419	1	0.000589419	0.000589419	0.000589419	1	20	0.99453
	21	0.000877788	0.00101935	1			0.00101935	1	21	0.612245			21	0.000855296	0.000582345	1	0.000582345	0.000582345	0.000582345	1	21	1.04426
	22	0.0010225	0.00096821	1			0.00096821	1	22	0.641399			22	0.000614345	0.000553199	1	0.000553199	0.000553199	0.000553199	1	22	1.09398
	23	0.000600154	0.000961647	1			0.000961647	1	23	0.670554			23	0.00115885	0.000530188	1	0.000530188	0.000530188	0.000530188	1	23	1.14371
	24	0.00137805	0.000960926	1			0.000960926	1	24	0.699708			24	0.000446581	0.000522412	2	0.000522412	0.000522412	0.000522412	1	24	1.19344
	25	0.000517295	0.000956983	1			0.000956983	1	25	0.728863			25	0.000553199	0.000520193	2	0.000520193	0.000520193	0.000520193	2	26	1.29289
	26	0.00101935	0.000956748	1			0.000956748	1	26	0.758017			26	0.000446581	0.000520193	1	Duplicate		0.000507236	1	27	1.34262
	27	0.000494769	0.000955533	1			0.000955533	1	27	0.787172			27	0.000725036	0.000507236	1	0.000507236	0.000507236	0.000503872	1	28	1.39234
	28	0.00057578	0.000953897	1			0.000953897	1	28	0.816327			28	0.000490304	0.000503872	1	0.000503872	0.000503872	0.000490304	1	29	1.44207
	29	0.000501575	0.000951992	1			0.000951992	1	29	0.845481			29	0.000503872	0.000490304	1	0.000490304	0.000490304	0.000482114	1	30	1.4918
	30	0.000961647	0.00094164	1			0.00094164	1	30	0.874636			30	0.000589419	0.000482114	1	0.000482114	0.000482114	0.000451138	1	31	1.54152
	31	0.000405326	0.000931978	1			0.000931978	1	31	0.90379			31	0.000710842	0.000451138	1	0.000451138	0.000451138	0.000447777	1	32	1.59125
	32	0.000730116	0.000926142	1			0.000926142	1	32	0.932945			32	0.000897007	0.000447777	2	0.000447777	0.000447777	0.000446581	2	34	1.6907
	33	0.00139439	0.000903976	1			0.000903976	1	33	0.962099			33	0.000396116	0.000446581	2	0.000446581	0.000446581	0.000444277	1	35	1.74043
	34	0.00096821	0.00088249	1			0.00088249	1	34	0.991254			34	0.000374181	0.000446581	1	Duplicate		0.000396116	1	36	1.79015
	35	0.000663235	0.000882416	1			0.000882416	1	35	1.02041			35	0.000444277	0.000444277	1	0.000444277	0.000444277	0.000374181	1	37	1.83988
	36	0.000730487	0.000877788	1			0.000877788	1	36	1.04956			36	0.000359992	0.000396116	1	0.000396116	0.000396116	0.000359992	1	38	1.88961
	37	0.000785618	0.000871173	1			0.000871173	1	37	1.07872			37	0.000447777	0.000374181	1	0.000374181	0.000374181	0.000314841	1	39	1.93933
	38	0.000566257	0.000862113	1			0.000862113	1	38	1.10787			38	0.000530188	0.000359992	1	0.000359992	0.000359992	0.00027719	1	40	1.98906
	39	0.000716159	0.000860484	1			0.000860484	1	39	1.13703			39	0.000797	0.000314841	1	0.000314841	0.000314841
	40	0.000953897	0.000854345	1			0.000854345	1	40	1.16618			40	0.000632092	0.00027719	1	0.00027719	0.00027719
	41	0.000646565	0.000815857	1			0.000815857	1	41	1.19534
	42	0.000552134	0.000815632	1			0.000815632	1	42	1.22449
	43	0.000792906	0.000807937	1			0.000807937	1	43	1.25364
	44	0.000466959	0.000805443	1			0.000805443	1	44	1.2828
	45	0.00074586	0.000792906	1			0.000792906	1	45	1.31195
	46	0.000854345	0.000789612	1			0.000789612	1	46	1.34111
	47	0.000815857	0.00078933	1			0.00078933	1	47	1.37026
	48	0.000571525	0.000785618	1			0.000785618	1	48	1.39942
	49	0.000361459	0.000774801	1			0.000774801	1	49	1.42857
	50	0.000807937	0.000771873	1			0.000771873	1	50	1.45773
	51	0.000620668	0.000761873	1			0.000761873	1	51	1.48688
	52	0.000747249	0.000747249	1			0.000747249	1	52	1.51603
	53	0.000447936	0.000745861	1			0.000745861	1	53	1.54519
	54	0.000815632	0.00074586	1			0.00074586	1	54	1.57434
	55	0.000674696	0.000730487	1			0.000730487	1	55	1.6035
	56	0.00133466	0.000730116	1			0.000730116	1	56	1.63265
	57	0.000774801	0.000727502	1			0.000727502	1	57	1.66181
	58	0.00105832	0.000719346	1			0.000719346	1	58	1.69096
	59	0.000745861	0.000716159	1			0.000716159	1	59	1.72012
	60	0.000956748	0.000700739	1			0.000700739	1	60	1.74927
	61	0.000771873	0.000691099	1			0.000691099	1	61	1.77843
	62	0.000591796	0.000674696	1			0.000674696	1	62	1.80758
	63	0.00144628	0.000663501	1			0.000663501	1	63	1.83673
	64	0.00125868	0.000663235	1			0.000663235	1	64	1.86589
	65	0.000956983	0.00065801	1			0.00065801	1	65	1.89504
	66	0.000271177	0.000646565	1			0.000646565	1	66	1.9242
	67	0.000639058	0.000639058	1			0.000639058	1	67	1.95335
	68	0.00113539	0.000622783	1			0.000622783	1	68	1.98251
	69	0.000691099	0.000620668	1			0.000620668	1	69	2.01166
	70	0.000719346	0.000614367	1			0.000614367	1	70	2.04082
	71	0.000482024	0.000600167	1			0.000600167	1	71	2.06997
	72	0.000700739	0.000600154	1			0.000600154	1	72	2.09913
	73	0.00088249	0.000591796	1			0.000591796	1	73	2.12828
	74	0.000497728	0.000588661	1			0.000588661	1	74	2.15743
	75	0.00049773	0.00057578	1			0.00057578	1	75	2.18659
	76	0.00051808	0.000571525	1			0.000571525	1	76	2.21574
	77	0.00043594	0.000566257	1			0.000566257	1	77	2.2449
	78	0.000614367	0.000552134	1			0.000552134	1	78	2.27405
	79	0.00124687	0.00051808	1			0.00051808	1	79	2.30321
	80	0.000903976	0.000517295	1			0.000517295	1	80	2.33236
	81	0.000761873	0.000509165	1			0.000509165	1	81	2.36152
	82	0.00094164	0.000501575	1			0.000501575	1	82	2.39067
	83	0.000882416	0.00049773	1			0.00049773	1	83	2.41983
	84	0.000862113	0.000497728	1			0.000497728	1	84	2.44898
	85	0.000663501	0.000494769	1			0.000494769	1	85	2.47813
	86	0.000509165	0.000482024	1			0.000482024	1	86	2.50729
	87	0.00110182	0.000466959	1			0.000466959	1	87	2.53644
	88	0.00166811	0.000447936	1			0.000447936	1	88	2.5656
	89	0.000622783	0.00043594	1			0.00043594	1	89	2.59475
	90	0.00102197	0.000405326	1			0.000405326	1	90	2.62391
	91	0.000727502	0.000361459	1			0.000361459	1	91	2.65306
	92	0.000955533	0.000271177	1			0.000271177	1	92	2.68222

## Sheet: Set C Fractures - NW
RR Microscanline	Microfracture	Aperture (mm)	Aperture (mm) sorted	Frequency	Aperture duplicates	no duplicates	no empty cells	Frequency	Cumulative Frequency	cum freq/length		BR Microscanline	Microfracture	Aperture (mm)	Aperture (mm) sorted	Frequency	Aperture duplicates	no duplicates	no empty cells	Frequency	Cumulative Frequency	cum freq/length		Rt16 Microscanline	Microfracture	Aperture (mm)	Aperture (mm) sorted	Frequency	Aperture duplicates	no duplicates	no empty cells	Frequency	Cumulative Frequency	cum freq/length		Rt16 Macroscanline	Fracture	Aperture (mm) sorted	Frequency	Aperture duplicates	no duplicates	no empty cells	Frequency	Cumulative Frequency	cum freq/length
RR-4	1	0.000542402	0.00258484	1	0.00258484	0.00258484	0.00258484	1	1	0.0291545		BR-21-3	1	0.000925144	0.00124809	1			0.00124809	1	1	0.0497265		R16-3-2C-1	1	0.000587	0.013165	1	0.013165	0.013165	0.013165	1	1	0.0237248		RT16-2	1	1.15	1	1.15	1.15	1.15	1	1	2.40385e-05
34.30 mm	2	0.000757001	0.00221553	1	0.00221553	0.00221553	0.00221553	1	2	0.058309		20.11 mm	2	0.000804819	0.00118511	1			0.00118511	1	2	0.099453		42.15 mm	2	0.001225	0.002877	1	0.002877	0.002877	0.002877	1	2	0.0474496		41.6 m	2	0.75	2	0.75	0.75	0.75	2	3	7.21154e-05
	3	0.00151547	0.00216607	1	0.00216607	0.00216607	0.00216607	1	3	0.0874636			3	0.00124809	0.00116522	1			0.00116522	1	3	0.14918			3	0.000915	0.002065	1	0.002065	0.002065	0.002065	1	3	0.0711744			3	0.75	2	Duplicate		0.62	2	5	0.000120192
	4	0.00122065	0.00205837	2	0.00205837	0.00205837	0.00205837	1	4	0.116618			4	0.000562113	0.00099444	1			0.00099444	1	4	0.198906			4	0.000986	0.002062	1	0.002062	0.002062	0.002062	1	4	0.0948992			4	0.62	2	0.62	0.62	0.5	4	9	0.000216346
	5	0.00136087	0.00186391	2	0.00186391	0.00186391	0.00186391	2	6	0.174927			5	0.000756249	0.000966202	1			0.000966202	1	5	0.248633			5	0.000581	0.001591	1	0.001591	0.001591	0.001591	1	5	0.118624			5	0.62	2	Duplicate		0.4	6	15	0.000360577
	6	0.000592945	0.00186391	1	Duplicate		0.00156575	1	7	0.204082			6	0.00116522	0.000925144	1			0.000925144	1	6	0.298359			6	0.000421	0.001569	1	0.001569	0.001569	0.001569	1	6	0.142349			6	0.5	4	0.5	0.5	0.33	2	17	0.000408654
	7	0.00108092	0.00156575	1	0.00156575	0.00156575	0.00153398	1	8	0.233236			7	0.000592395	0.000880746	1			0.000880746	1	7	0.348086			7	0.000759	0.001455	1	0.001455	0.001455	0.001455	1	7	0.166074			7	0.5	4	Duplicate		0.265	2	19	0.000456731
	8	0.00078576	0.00153398	1	0.00153398	0.00153398	0.00151547	1	9	0.262391			8	0.000546006	0.000804819	1			0.000804819	1	8	0.397812			8	0.000744	0.001436	1	0.001436	0.001436	0.001436	1	8	0.189798			8	0.5	4	Duplicate		0.215	3	22	0.000528846
	9	0.000766906	0.00151547	1	0.00151547	0.00151547	0.001478	1	10	0.291545			9	0.00071867	0.000799372	1			0.000799372	1	9	0.447539			9	0.001197	0.001425	1	0.001425	0.001425	0.001425	1	9	0.213523			9	0.5	4	Duplicate		0.175	2	24	0.000576923
	10	0.000853753	0.001478	1	0.001478	0.001478	0.00144147	1	11	0.3207			10	0.00061522	0.000756249	1			0.000756249	1	10	0.497265			10	0.001068	0.001423	1	0.001423	0.001423	0.001423	1	10	0.237248			10	0.4	6	0.4	0.4
	11	0.000694523	0.00144147	1	0.00144147	0.00144147	0.00141144	1	12	0.349854			11	0.000457985	0.00071867	1			0.00071867	1	11	0.546992			11	0.000607	0.00141	1	0.00141	0.00141	0.00141	1	11	0.260973			11	0.4	6	Duplicate
	12	0.000398297	0.00141144	1	0.00141144	0.00141144	0.00140209	1	13	0.379009			12	0.00041639	0.000674532	1			0.000674532	1	12	0.596718			12	0.000879	0.00132	1	0.00132	0.00132	0.00132	1	12	0.284698			12	0.4	6	Duplicate
	13	0.000492191	0.00140209	1	0.00140209	0.00140209	0.00138114	1	14	0.408163			13	0.00057108	0.000653071	1			0.000653071	1	13	0.646445			13	0.000536	0.001303	1	0.001303	0.001303	0.001303	1	13	0.308422			13	0.4	6	Duplicate
	14	0.00045836	0.00138114	1	0.00138114	0.00138114	0.00136087	1	15	0.437318			14	0.000799372	0.000648851	1			0.000648851	1	14	0.696171			14	0.000787	0.001233	1	0.001233	0.001233	0.001233	1	14	0.332147			14	0.4	6	Duplicate
	15	0.000499113	0.00136087	1	0.00136087	0.00136087	0.00133045	1	16	0.466472			15	0.000357743	0.000635533	1			0.000635533	1	15	0.745898			15	0.001096	0.001225	1	0.001225	0.001225	0.001225	1	15	0.355872			15	0.4	6	Duplicate
	16	0.000570025	0.00133045	1	0.00133045	0.00133045	0.00122875	1	17	0.495627			16	0.000674532	0.00061522	1			0.00061522	1	16	0.795624			16	0.000697	0.001201	1	0.001201	0.001201	0.001201	1	16	0.379597			16	0.33	2	0.33	0.33
	17	0.00103239	0.00122875	1	0.00122875	0.00122875	0.00122065	1	18	0.524781			17	0.00118511	0.00061088	1			0.00061088	1	17	0.845351			17	0.001425	0.001197	1	0.001197	0.001197	0.001197	1	17	0.403321			17	0.33	2	Duplicate
	18	0.00102519	0.00122065	1	0.00122065	0.00122065	0.00118585	1	19	0.553936			18	0.000262868	0.000607905	1			0.000607905	1	18	0.895077			18	0.00132	0.001187	1	0.001187	0.001187	0.001187	1	18	0.427046			18	0.265	2	0.265	0.265
	19	0.000765938	0.00118585	1	0.00118585	0.00118585	0.00117038	1	20	0.58309			19	0.000385769	0.000592395	1			0.000592395	1	19	0.944804			19	0.001303	0.00118	1	0.00118	0.00118	0.00118	1	19	0.450771			19	0.265	2	Duplicate
	20	0.00060576	0.00117038	1	0.00117038	0.00117038	0.00116344	1	21	0.612245			20	0.000511212	0.00057108	1			0.00057108	1	20	0.99453			20	0.00077	0.001164	1	0.001164	0.001164	0.001164	1	20	0.474496			20	0.215	3	0.215	0.215
	21	0.00216607	0.00116344	1	0.00116344	0.00116344	0.00116022	1	22	0.641399			21	0.000532014	0.000562113	1			0.000562113	1	21	1.04426			21	0.00141	0.001096	2	0.001096	0.001096	0.001096	1	21	0.498221			21	0.215	3	Duplicate
	22	0.000712466	0.00116022	1	0.00116022	0.00116022	0.00115668	1	23	0.670554			22	0.00061088	0.000546043	1			0.000546043	1	22	1.09398			22	0.00093	0.001085	2	0.001085	0.001085	0.001085	2	23	0.54567			22	0.215	3	Duplicate
	23	0.000660281	0.00115668	1	0.00115668	0.00115668	0.0011559	1	24	0.699708			23	0.00099444	0.000546006	1			0.000546006	1	23	1.14371			23	0.001423	0.001085	1	Duplicate		0.001068	1	24	0.569395			23	0.175	2	0.175	0.175
	24	0.00109666	0.0011559	1	0.0011559	0.0011559	0.00109691	1	25	0.728863			24	0.000607905	0.000532014	1			0.000532014	1	24	1.19344			24	0.001436	0.001068	1	0.001068	0.001068	0.001047	1	25	0.59312			24	0.175	2	Duplicate
	25	0.00090945	0.00109691	1	0.00109691	0.00109691	0.00109666	1	26	0.758017			25	0.000653071	0.000511212	1			0.000511212	1	25	1.24316			25	0.000749	0.001047	1	0.001047	0.001047	0.001042	1	26	0.616845
	26	0.00070735	0.00109666	1	0.00109666	0.00109666	0.00108092	1	27	0.787172			26	0.000880746	0.000457985	1			0.000457985	1	26	1.29289			26	0.000654	0.001042	1	0.001042	0.001042	0.001016	1	27	0.640569
	27	0.00044393	0.00108092	1	0.00108092	0.00108092	0.00107938	1	28	0.816327			27	0.000648851	0.00041639	1			0.00041639	1	27	1.34262			27	0.001591	0.001016	1	0.001016	0.001016	0.000986	1	28	0.664294
	28	0.000582708	0.00107938	1	0.00107938	0.00107938	0.00106436	1	29	0.845481			28	0.000966202	0.000385769	1			0.000385769	1	28	1.39234			28	0.000843	0.000986	2	0.000986	0.000986	0.00098	2	30	0.711744
	29	0.0011559	0.00106436	1	0.00106436	0.00106436	0.00106262	1	30	0.874636			29	0.000546043	0.000357743	1			0.000357743	1	29	1.44207			29	0.00118	0.00098	2	0.00098	0.00098	0.000967	1	31	0.735469
	30	0.000637624	0.00106262	1	0.00106262	0.00106262	0.00104672	1	31	0.90379			30	0.000635533	0.000262868	1			0.000262868	1	30	1.4918			30	0.000701	0.00098	1	Duplicate		0.00095	1	32	0.759193
	31	0.00115668	0.00104672	1	0.00104672	0.00104672	0.00104664	1	32	0.932945															31	0.000887	0.000967	1	0.000967	0.000967	0.00093	1	33	0.782918
	32	0.000472818	0.00104664	1	0.00104664	0.00104664	0.00104541	1	33	0.962099															32	0.001187	0.00095	1	0.00095	0.00095	0.000915	1	34	0.806643
	33	0.000866423	0.00104541	1	0.00104541	0.00104541	0.00103239	1	34	0.991254															33	0.00098	0.00093	1	0.00093	0.00093	0.000899	1	35	0.830368
	34	0.000714594	0.00103239	1	0.00103239	0.00103239	0.00102519	1	35	1.02041															34	0.00095	0.000915	1	0.000915	0.000915	0.000887	1	36	0.854093
	35	0.00104664	0.00102519	1	0.00102519	0.00102519	0.00102254	1	36	1.04956															35	0.001047	0.000899	1	0.000899	0.000899	0.000879	2	38	0.901542
	36	0.00122875	0.00102254	1	0.00102254	0.00102254	0.00102041	1	37	1.07872															36	0.001455	0.000887	2	0.000887	0.000887	0.000845	1	39	0.925267
	37	0.000732606	0.00102041	1	0.00102041	0.00102041	0.000982987	1	38	1.10787															37	0.000967	0.000879	2	0.000879	0.000879	0.000843	1	40	0.948992
	38	0.000912681	0.000982987	1	0.000982987	0.000982987	0.000962651	1	39	1.13703															38	0.001085	0.000879	1	Duplicate		0.000811	1	41	0.972716
	39	0.000884354	0.000962651	1	0.000962651	0.000962651	0.000962261	1	40	1.16618															39	0.001233	0.000845	1	0.000845	0.000845	0.000787	1	42	0.996441
	40	0.000785739	0.000962261	1	0.000962261	0.000962261	0.00094077	1	41	1.19534															40	0.000682	0.000843	1	0.000843	0.000843	0.00077	1	43	1.02017
	41	0.00118585	0.00094077	1	0.00094077	0.00094077	0.00092527	1	42	1.22449															41	0.001042	0.000811	1	0.000811	0.000811	0.000759	1	44	1.04389
	42	0.000523826	0.00092527	1	0.00092527	0.00092527	0.000923568	1	43	1.25364															42	0.001164	0.000787	1	0.000787	0.000787	0.000749	1	45	1.06762
	43	0.000654783	0.000923568	2	0.000923568	0.000923568	0.000912681	2	45	1.31195															43	0.000738	0.00077	1	0.00077	0.00077	0.000744	1	46	1.09134
	44	0.00138114	0.000912681	2	0.000912681	0.000912681	0.00090945	1	46	1.34111															44	0.00098	0.000759	1	0.000759	0.000759	0.000738	1	47	1.11507
	45	0.00133045	0.000912681	1	Duplicate		0.000884354	2	48	1.39942															45	0.002065	0.000749	1	0.000749	0.000749	0.000701	1	48	1.13879
	46	0.00094077	0.00090945	2	0.00090945	0.00090945	0.000882992	1	49	1.42857															46	0.000691	0.000744	1	0.000744	0.000744	0.000697	1	49	1.16251
	47	0.000664831	0.000884354	2	0.000884354	0.000884354	0.000866826	1	50	1.45773															47	0.001016	0.000738	1	0.000738	0.000738	0.000691	1	50	1.18624
	48	0.000795001	0.000884354	1	Duplicate		0.000866423	1	51	1.48688															48	0.002877	0.000701	1	0.000701	0.000701	0.000682	1	51	1.20996
	49	0.000790679	0.000882992	1	0.000882992	0.000882992	0.000853753	1	52	1.51603															49	0.002062	0.000697	1	0.000697	0.000697	0.000654	1	52	1.23369
	50	0.00205837	0.000866826	1	0.000866826	0.000866826	0.00084046	1	53	1.54519															50	0.000811	0.000691	1	0.000691	0.000691	0.000635	1	53	1.25741
	51	0.00156575	0.000866423	1	0.000866423	0.000866423	0.000838594	1	54	1.57434															51	0.000395	0.000682	1	0.000682	0.000682	0.000629	1	54	1.28114
	52	0.00140209	0.000853753	1	0.000853753	0.000853753	0.000819156	1	55	1.6035															52	0.001201	0.000654	1	0.000654	0.000654	0.000615	1	55	1.30486
	53	0.000398482	0.00084046	1	0.00084046	0.00084046	0.00081735	1	56	1.63265															53	0.001569	0.000635	1	0.000635	0.000635	0.000607	1	56	1.32859
	54	0.00102041	0.000838594	1	0.000838594	0.000838594	0.000816327	1	57	1.66181															54	0.000615	0.000629	1	0.000629	0.000629	0.000587	1	57	1.35231
	55	0.00104541	0.000819156	1	0.000819156	0.000819156	0.000812212	1	58	1.69096															55	0.013165	0.000615	1	0.000615	0.000615	0.000581	1	58	1.37604
	56	0.000637571	0.00081735	1	0.00081735	0.00081735	0.000796964	2	60	1.74927															56	0.000635	0.000607	1	0.000607	0.000607	0.000565	1	59	1.39976
	57	0.000637571	0.000816327	1	0.000816327	0.000816327	0.000795001	1	61	1.77843															57	0.000531	0.000587	1	0.000587	0.000587	0.000536	1	60	1.42349
	58	0.000816327	0.000812212	2	0.000812212	0.000812212	0.000793327	2	63	1.83673															58	0.000629	0.000581	1	0.000581	0.000581	0.000531	1	61	1.44721
	59	0.000882992	0.000796964	2	0.000796964	0.000796964	0.000790679	1	64	1.86589															59	0.000879	0.000565	1	0.000565	0.000565	0.000528	1	62	1.47094
	60	0.000588661	0.000796964	1	Duplicate		0.00078576	1	65	1.89504															60	0.000528	0.000536	1	0.000536	0.000536	0.000421	1	63	1.49466
	61	0.000588661	0.000795001	2	0.000795001	0.000795001	0.000785739	1	66	1.9242															61	0.000565	0.000531	1	0.000531	0.000531	0.000395	1	64	1.51839
	62	0.000702231	0.000793327	2	0.000793327	0.000793327	0.000781213	1	67	1.95335															62	0.001085	0.000528	1	0.000528	0.000528	0.000365	1	65	1.54211
	63	0.000692676	0.000793327	1	Duplicate		0.000766906	1	68	1.98251															63	0.000365	0.000421	1	0.000421	0.000421	0.000265	1	66	1.56584
	64	0.000702231	0.000790679	1	0.000790679	0.000790679	0.000765938	1	69	2.01166															64	0.000899	0.000395	1	0.000395	0.000395
	65	0.000412307	0.00078576	1	0.00078576	0.00078576	0.000757001	1	70	2.04082															65	0.000265	0.000365	1	0.000365	0.000365
	66	0.00073611	0.000785739	1	0.000785739	0.000785739	0.00073611	1	71	2.06997															66	0.000845	0.000265	1	0.000265	0.000265
	67	0.00258484	0.000781213	1	0.000781213	0.000781213	0.000732675	1	72	2.09913
	68	0.000838594	0.000766906	1	0.000766906	0.000766906	0.000732606	1	73	2.12828
	69	0.001478	0.000765938	1	0.000765938	0.000765938	0.000730145	1	74	2.15743
	70	0.00153398	0.000757001	1	0.000757001	0.000757001	0.000715694	1	75	2.18659
	71	0.00092527	0.00073611	1	0.00073611	0.00073611	0.000714594	1	76	2.21574
	72	0.000812212	0.000732675	1	0.000732675	0.000732675	0.000712466	1	77	2.2449
	73	0.000923568	0.000732606	1	0.000732606	0.000732606	0.00070735	1	78	2.27405
	74	0.00107938	0.000730145	1	0.000730145	0.000730145	0.000702678	1	79	2.30321
	75	0.00106436	0.000715694	1	0.000715694	0.000715694	0.000702231	2	81	2.36152
	76	0.00141144	0.000714594	1	0.000714594	0.000714594	0.000694523	1	82	2.39067
	77	0.000702678	0.000712466	1	0.000712466	0.000712466	0.000692676	1	83	2.41983
	78	0.00221553	0.00070735	1	0.00070735	0.00070735	0.000679994	1	84	2.44898
	79	0.000580565	0.000702678	2	0.000702678	0.000702678	0.000664831	1	85	2.47813
	80	0.00186391	0.000702231	2	0.000702231	0.000702231	0.000660281	1	86	2.50729
	81	0.00081735	0.000702231	1	Duplicate		0.000654783	1	87	2.53644
	82	0.00186391	0.000694523	1	0.000694523	0.000694523	0.00065338	1	88	2.5656
	83	0.00104672	0.000692676	1	0.000692676	0.000692676	0.000648315	1	89	2.59475
	84	0.000962261	0.000679994	1	0.000679994	0.000679994	0.000641767	1	90	2.62391
	85	0.000793327	0.000664831	1	0.000664831	0.000664831	0.000638227	1	91	2.65306
	86	0.000793327	0.000660281	1	0.000660281	0.000660281	0.000637624	1	92	2.68222
	87	0.000605442	0.000654783	1	0.000654783	0.000654783	0.000637571	2	94	2.74052
	88	0.000638227	0.00065338	1	0.00065338	0.00065338	0.000621696	1	95	2.76968
	89	0.00065338	0.000648315	1	0.000648315	0.000648315	0.00062069	1	96	2.79883
	90	0.000962651	0.000641767	1	0.000641767	0.000641767	0.000614367	1	97	2.82799
	91	0.00144147	0.000638227	1	0.000638227	0.000638227	0.000608454	1	98	2.85714
	92	0.000715694	0.000637624	2	0.000637624	0.000637624	0.00060576	1	99	2.8863
	93	0.00116344	0.000637571	2	0.000637571	0.000637571	0.000605442	1	100	2.91545
	94	0.00057723	0.000637571	1	Duplicate		0.000602314	1	101	2.94461
	95	0.000982987	0.000621696	1	0.000621696	0.000621696	0.000592945	1	102	2.97376
	96	0.000730145	0.00062069	1	0.00062069	0.00062069	0.000588661	2	104	3.03207
	97	0.000732675	0.000614367	1	0.000614367	0.000614367	0.000585192	2	106	3.09038
	98	0.000819156	0.000608454	1	0.000608454	0.000608454	0.000582708	1	107	3.11953
	99	0.000796964	0.00060576	1	0.00060576	0.00060576	0.000580565	1	108	3.14869
	100	0.000435919	0.000605442	1	0.000605442	0.000605442	0.00057723	2	110	3.207
	101	0.00117038	0.000602314	1	0.000602314	0.000602314	0.000570025	1	111	3.23615
	102	0.000912681	0.000592945	2	0.000592945	0.000592945	0.000542402	1	112	3.26531
	103	0.00057723	0.000588661	2	0.000588661	0.000588661	0.000523826	1	113	3.29446
	104	0.000884354	0.000588661	2	Duplicate		0.000499113	1	114	3.32362
	105	0.000585192	0.000585192	2	0.000585192	0.000585192	0.000492191	1	115	3.35277
	106	0.000413234	0.000585192	1	Duplicate		0.000472818	1	116	3.38192
	107	0.000614367	0.000582708	1	0.000582708	0.000582708	0.00045836	1	117	3.41108
	108	0.00084046	0.000580565	2	0.000580565	0.000580565	0.00044393	1	118	3.44023
	109	0.00116022	0.00057723	2	0.00057723	0.00057723	0.000435919	1	119	3.46939
	110	0.000621696	0.00057723	1	Duplicate		0.000435587	1	120	3.49854
	111	0.000866826	0.000570025	1	0.000570025	0.000570025	0.000413234	1	121	3.5277
	112	0.000679994	0.000542402	1	0.000542402	0.000542402	0.000412307	1	122	3.55685
	113	0.000379395	0.000523826	1	0.000523826	0.000523826	0.000398482	1	123	3.58601
	114	0.000648315	0.000499113	1	0.000499113	0.000499113	0.000398297	1	124	3.61516
	115	0.000781213	0.000492191	1	0.000492191	0.000492191	0.000379395	1	125	3.64431
	116	0.000435587	0.000472818	1	0.000472818	0.000472818	0.000245276	1	126	3.67347
	117	0.000245276	0.00045836	1	0.00045836	0.00045836
	118	0.000585192	0.00044393	1	0.00044393	0.00044393
	119	0.00062069	0.000435919	1	0.000435919	0.000435919
	120	0.000796964	0.000435587	1	0.000435587	0.000435587
	121	0.00102254	0.000413234	1	0.000413234	0.000413234
	122	0.000641767	0.000412307	1	0.000412307	0.000412307
	123	0.00109691	0.000398482	1	0.000398482	0.000398482
	124	0.000608454	0.000398297	1	0.000398297	0.000398297
	125	0.00106262	0.000379395	1	0.000379395	0.000379395
	126	0.000602314	0.000245276	1	0.000245276	0.000245276

## Sheet: Set D Fractures - ENE
Rt16 Microscanline	Microfracture	Aperture (mm)	Aperture mm sorted	frequency	Aperture duplicates	no duplicates	no empty cells	Frequency	Cumulative Frequency	cum freq/length
R16-3-2C-2	1	0.000615552	0.00496166	1	0.00496166	0.00496166	0.00496166	1	1	0.0226706
44.11 mm	2	0.00075	0.00318961	1	0.00318961	0.00318961	0.00318961	1	2	0.0453412
	3	0.00055085	0.00260305	1	0.00260305	0.00260305	0.00260305	1	3	0.0680118
	4	0.000675972	0.00172312	1	0.00172312	0.00172312	0.00172312	1	4	0.0906824
	5	0.00172312	0.00163447	1	0.00163447	0.00163447	0.00163447	1	5	0.113353
	6	0.0006875	0.00147221	1	0.00147221	0.00147221	0.00147221	1	6	0.136024
	7	0.000385294	0.00129184	1	0.00129184	0.00129184	0.00129184	1	7	0.158694
	8	0.000501733	0.00125123	1	0.00125123	0.00125123	0.00125123	1	8	0.181365
	9	0.00032709	0.00105255	1	0.00105255	0.00105255	0.00105255	1	9	0.204035
	10	0.00163447	0.0010487	1	0.0010487	0.0010487	0.0010487	1	10	0.226706
	11	0.000760702	0.00101817	1	0.00101817	0.00101817	0.00101817	1	11	0.249377
	12	0.00105255	0.00101379	1	0.00101379	0.00101379	0.00101379	1	12	0.272047
	13	0.000333333	0.001	1	0.001	0.001	0.001	1	13	0.294718
	14	0.000999673	0.000999673	1	0.000999673	0.000999673	0.000999673	1	14	0.317388
	15	0.000631133	0.000849837	1	0.000849837	0.000849837	0.000849837	1	15	0.340059
	16	0.000305556	0.000813182	1	0.000813182	0.000813182	0.000813182	1	16	0.36273
	17	0.00071875	0.0008125	1	0.0008125	0.0008125	0.0008125	1	17	0.3854
	18	0.000607169	0.000792599	1	0.000792599	0.000792599	0.000792599	1	18	0.408071
	19	0.00101817	0.000760702	2	0.000760702	0.000760702	0.000760702	1	19	0.430741
	20	0.000482669	0.00075	2	0.00075	0.00075	0.00075	2	21	0.476083
	21	0.00147221	0.00075	1	Duplicate		0.000724356	1	22	0.498753
	22	0.000460639	0.000724356	1	0.000724356	0.000724356	0.00071875	1	23	0.521424
	23	0.000792599	0.00071875	1	0.00071875	0.00071875	0.000710384	1	24	0.544094
	24	0.000639492	0.000710384	1	0.000710384	0.000710384	0.000709558	1	25	0.566765
	25	0.000388889	0.000709558	1	0.000709558	0.000709558	0.000703277	1	26	0.589436
	26	0.000388889	0.000703277	1	0.000703277	0.000703277	0.0006875	1	27	0.612106
	27	0.000642826	0.0006875	1	0.0006875	0.0006875	0.000675972	1	28	0.634777
	28	0.00260305	0.000675972	2	0.000675972	0.000675972	0.000666667	2	30	0.680118
	29	0.000813182	0.000666667	2	0.000666667	0.000666667	0.000658314	1	31	0.702788
	30	0.000285714	0.000666667	1	Duplicate		0.000645833	1	32	0.725459
	31	0.000658314	0.000658314	1	0.000658314	0.000658314	0.000642826	1	33	0.74813
	32	0.00043948	0.000645833	1	0.000645833	0.000645833	0.000639492	2	35	0.793471
	33	0.000346672	0.000642826	2	0.000642826	0.000642826	0.000631133	1	36	0.816141
	34	0.000645833	0.000639492	2	0.000639492	0.000639492	0.000626331	1	37	0.838812
	35	0.00125123	0.000639492	1	Duplicate		0.000625087	1	38	0.861483
	36	0.00496166	0.000631133	1	0.000631133	0.000631133	0.000624228	1	39	0.884153
	37	0.00318961	0.000626331	1	0.000626331	0.000626331	0.000615552	1	40	0.906824
	38	0.000624228	0.000625087	1	0.000625087	0.000625087	0.000607169	1	41	0.929494
	39	0.000479167	0.000624228	1	0.000624228	0.000624228	0.000593841	1	42	0.952165
	40	0.000709558	0.000615552	1	0.000615552	0.000615552	0.000584373	1	43	0.974836
	41	0.00039597	0.000607169	1	0.000607169	0.000607169	0.000566728	1	44	0.997506
	42	0.000625087	0.000593841	1	0.000593841	0.000593841	0.000555556	2	46	1.04285
	43	0.000710384	0.000584373	1	0.000584373	0.000584373	0.00055085	1	47	1.06552
	44	0.000666667	0.000566728	2	0.000566728	0.000566728	0.000545261	1	48	1.08819
	45	0.000566728	0.000555556	2	0.000555556	0.000555556	0.000514229	1	49	1.11086
	46	0.000666667	0.000555556	1	Duplicate		0.000507419	1	50	1.13353
	47	0.00129184	0.00055085	1	0.00055085	0.00055085	0.000501733	2	52	1.17887
	48	0.0008125	0.000545261	1	0.000545261	0.000545261	0.000485341	1	53	1.20154
	49	0.0004375	0.000514229	1	0.000514229	0.000514229	0.000482669	1	54	1.22421
	50	0.000501733	0.000507419	2	0.000507419	0.000507419	0.000479167	1	55	1.24688
	51	0.000356	0.000501733	2	0.000501733	0.000501733	0.000466667	1	56	1.26955
	52	0.000294628	0.000501733	1	Duplicate		0.000460639	1	57	1.29222
	53	0.00034375	0.000485341	1	0.000485341	0.000485341	0.000444444	1	58	1.31489
	54	0.000514229	0.000482669	1	0.000482669	0.000482669	0.00043948	1	59	1.33757
	55	0.000593841	0.000479167	1	0.000479167	0.000479167	0.0004375	1	60	1.36024
	56	0.000375578	0.000466667	1	0.000466667	0.000466667	0.00039597	1	61	1.38291
	57	0.000233324	0.000460639	1	0.000460639	0.000460639	0.000388889	2	63	1.42825
	58	0.000507419	0.000444444	1	0.000444444	0.000444444	0.000385294	1	64	1.45092
	59	0.000233324	0.00043948	1	0.00043948	0.00043948	0.000375578	1	65	1.47359
	60	0.000545261	0.0004375	1	0.0004375	0.0004375	0.000356	1	66	1.49626
	61	0.000849837	0.00039597	2	0.00039597	0.00039597	0.000346672	1	67	1.51893
	62	0.000639492	0.000388889	2	0.000388889	0.000388889	0.00034375	1	68	1.5416
	63	0.000303338	0.000388889	1	Duplicate		0.000333333	1	69	1.56427
	64	0.000291667	0.000385294	1	0.000385294	0.000385294	0.00032709	1	70	1.58694
	65	0.000171796	0.000375578	1	0.000375578	0.000375578	0.000305556	1	71	1.60961
	66	0.0010487	0.000356	1	0.000356	0.000356	0.000303338	1	72	1.63228
	67	0.000466667	0.000346672	1	0.000346672	0.000346672	0.000294628	1	73	1.65495
	68	0.000485341	0.00034375	1	0.00034375	0.00034375	0.000291667	1	74	1.67762
	69	0.000555556	0.000333333	1	0.000333333	0.000333333	0.000285714	1	75	1.70029
	70	0.000283279	0.00032709	1	0.00032709	0.00032709	0.000283279	1	76	1.72297
	71	0.000724356	0.000305556	1	0.000305556	0.000305556	0.000233324	2	78	1.76831
	72	0.000626331	0.000303338	1	0.000303338	0.000303338	0.000208333	1	79	1.79098
	73	0.000208333	0.000294628	1	0.000294628	0.000294628	0.000171796	1	80	1.81365
	74	0.000555556	0.000291667	1	0.000291667	0.000291667
	75	0.000444444	0.000285714	1	0.000285714	0.000285714
	76	0.00101379	0.000283279	2	0.000283279	0.000283279
	77	0.001	0.000233324	2	0.000233324	0.000233324
	78	0.000703277	0.000233324	1	Duplicate
	79	0.00075	0.000208333	1	0.000208333	0.000208333
	80	0.000584373	0.000171796	1	0.000171796	0.000171796
